# Supplementary material for: Bioinformatics Analysis and Functional Prediction of Transmembrane Proteins in Entamoeba histolytica
Source: MDPI journal article supplement (doi:10.3390/genes9100499), 2018-10-16
Supplement: s1 [file s1]

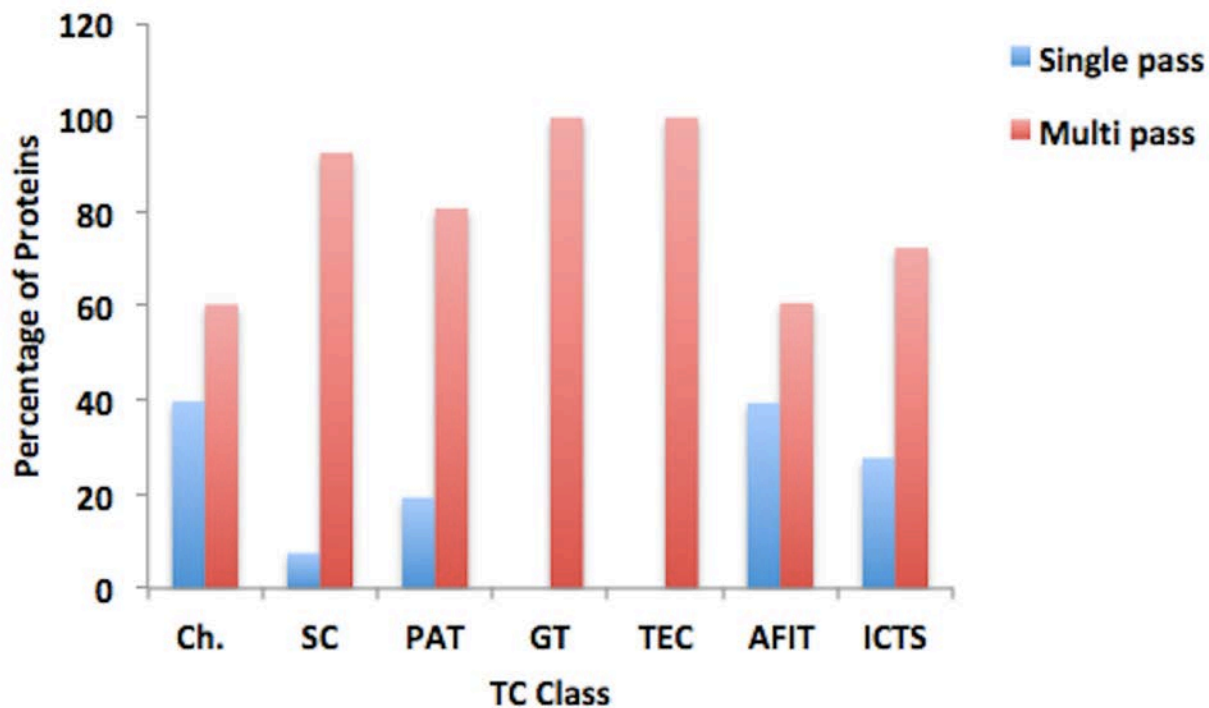

**Figure S1.** Distribution of single pass and multipass proteins in different classes of transporters in *E. histolytica*. (Ch.—channel, SC—secondary carriers, PAT—primary active transporters, GT—group translocators, TEC—Transmembrane electron carriers, AFIT—accessory factors involved in transport, ICTS—incompletely characterized transport systems).
