# Supplementary material for: Bioinformatics Analysis and Functional Prediction of Transmembrane Proteins in Entamoeba histolytica
Source: Genes (Basel). 2018 Oct 16;9(10):499. doi: 10.3390/genes9100499 (PMC6209943; doi:10.3390/genes9100499)
Supplement: Supplementary file 1 [file genes-09-00499-s001.zip › Table S1.xlsx]

## Sheet: Sheet1
TableS1. Complete dataset of the identification, classification and characterization of transmembrane and transmembrane transport proteins in E. histolytica.
UniProt ID	Gene Ids	Protein Name	AmoebaDB Names	Length	Protein Family	Localization		TM Helix		Signal Peptide	Substrate Specificity	TC Classification				GO Molecular Function	GO Biological Process
						Cello 2.0	LocTree 3	TMHMM	TOPCON	SignalP-4.1	TrSSP	TC Class	TC Class Description	TC Sub-Class	TC Sub-Class Description
C4M6W2	EHI_139330	Uncharacterized protein	hypothetical protein	230	YhhN-like protein	PlasmaMembrane	endoplasmic reticulum membrane	7	8	No	No hits	1	Channel	1.A.1.28.5	Voltage-gated Ion Channel (VIC) Superfamily
C4LXR7	EHI_014310	Calcium-gated potassium channel protein, putative	calcium-gated potassium channel protein, putative	862	Potassium channel domain	PlasmaMembrane	plasma membrane	7	6	No	Anion	1	Channel	1.A.1.3.1	Voltage-gated Ion Channel (VIC) Superfamily	calcium-activated potassium channel activity [GO:0015269]; voltage-gated potassium channel activity [GO:0005249]
C4M0T8	EHI_100500	Hypothetical membrane-spanning protein	hypothetical membrane-spanning protein	453	Tapt1 family	PlasmaMembrane	mitochondrion membrane	8	7	No	No hits	1	Channel	1.A.1.5.22	Voltage-gated Ion Channel (VIC) Superfamily
C4LY15	EHI_177610	Calcium load-activated calcium channel (CLAC channel)	hypothetical protein, conserved	176	Integral membrane protein DUF106	PlasmaMembrane	endoplasmic reticulum membrane	1	2	No	Cation	1	Channel	1.A.106.1.1	Calcium Load-activated Calcium Channel (CLAC) Family	calcium channel activity [GO:0005262]	endoplasmic reticulum calcium ion homeostasis [GO:0032469]
C4LWU5	EHI_198990	Formate/nitrite transporter family protein, putative	formate/nitrite transporter family protein, putative	356	Formate/nitrite transporter	PlasmaMembrane	golgi apparatus membrane	6	6	No	Anion/Cation/Sugar	1	Channel	1.A.16.2.1	Formate-Nitrite Transporter (FNT) Family	high-affinity secondary active nitrite transmembrane transporter activity [GO:0015513]	nitrite transport [GO:0015707]
C4LSV5	EHI_152720	Small-conductance mechanosensitive ion channel, putative	small-conductance mechanosensitive ion channel, putative	553	Mechanosensitive ion channel	PlasmaMembrane	plasma membrane	6	6	No	No hits	1	Channel	1.A.23.4.8	The Small Conductance Mechanosensitive Ion Channel (MscS) Family	mechanosensitive ion channel activity [GO:0008381]	anion transport [GO:0006820]
C4LYI4	EHI_093930	Guanylate-binding protein, putative	Guanylate-binding protein, putative	752	Guanylate-binding protein, N-terminal domain	Nuclear	endoplasmic reticulum membrane	1	2	Yes	No hits	1	Channel	1.N.5.1.4	Endoplasmic Reticulum (ER) Fusion GTPase, Atlastin (Atlastin) Family
C4LU83	EHI_110310	Magnesium and cobalt transport protein CorA, putative	magnesium and cobalt transport protein CorA, putative	422	CorA-like Mg2+ transporter protein	PlasmaMembrane	mitochondrion membrane	2	2	No	Anion/Cation/Proteins/mRNA	1	Channel	1.A.35.2.3	CorA Metal Ion Transporter (MIT) Family	metal ion transmembrane transporter activity [GO:0046873]	cation transmembrane transport [GO:0098655]
C4LWJ3	EHI_096840	Magnesium and cobalt transport protein CorA, putative	magnesium and cobalt transport protein CorA, putative	423	CorA-like Mg2+ transporter protein	PlasmaMembrane	mitochondrion membrane	2	2	No	No hits	1	Channel	1.A.35.2.3	CorA Metal Ion Transporter (MIT) Family	metal ion transmembrane transporter activity [GO:0046873]	cation transmembrane transport [GO:0098655]
C4M4J0	EHI_139000	Magnesium and cobalt transport protein CorA, putative	magnesium and cobalt transport protein CorA, putative	376	CorA-like Mg2+ transporter protein	PlasmaMembrane	mitochondrion membrane	2	2	No	Anion/Cation	1	Channel	1.A.35.3.2	CorA Metal Ion Transporter (MIT) Family	metal ion transmembrane transporter activity [GO:0046873]	cation transmembrane transport [GO:0098655]
C4LVA8	EHI_196900	Uncharacterized protein	hypothetical protein	367	Golgi pH regulator, conserved domain	PlasmaMembrane	plasma membrane	8	8	No	Anion	1	Channel	1.A.38.1.1	Golgi pH Regulator (GPHR) Family
C4M2H9	EHI_054480	Uncharacterized protein	hypothetical protein	132	FAMILY NOT NAMED (PTHR36460)	PlasmaMembrane	golgi apparatus membrane	3	3	No	Anion	1	Channel	1.A.4.6.3	Transient Receptor Potential Ca2+ Channel (TRP-CC) Family
C4M1A2	EHI_188280	Presenilin (EC 3.4.23.-)	presenilin 1 peptidase, putative	396	Presenilin	PlasmaMembrane	endoplasmic reticulum membrane	7	8	No	Cation	1	Channel	1.A.54.1.1	Presenilin ER Ca2+ Leak Channel (Presenilin) Family	aspartic-type endopeptidase activity [GO:0004190]; endopeptidase activity [GO:0004175]	Notch signaling pathway [GO:0007219]; protein processing [GO:0016485]
C4LY30	EHI_177160	Signal peptide peptidase family protein	signal peptide peptidase family protein	316	Signal peptide peptidase	PlasmaMembrane	endoplasmic reticulum membrane	9	9	No	No hits	1	Channel	1.A.54.3.1	Presenilin ER Ca2+ Leak Channel (Presenilin) Family	aspartic-type endopeptidase activity [GO:0004190]
C4M1W4	EHI_027780	Signal peptide peptidase family protein	signal peptide peptidase family protein	321	Signal peptide peptidase	PlasmaMembrane	golgi apparatus membrane	9	9	No	No hits	1	Channel	1.A.54.3.4	Presenilin ER Ca2+ Leak Channel (Presenilin) Family	aspartic-type endopeptidase activity [GO:0004190]
C4M4K7	EHI_031250	Signal peptidase, putative	signal peptidase, putative	340	Signal peptide peptidase	PlasmaMembrane	endoplasmic reticulum membrane	8	9	No	No hits	1	Channel	1.A.54.3.4	Presenilin ER Ca2+ Leak Channel (Presenilin) Family	aspartic-type endopeptidase activity [GO:0004190]
C4LXG0	EHI_130920	Uncharacterized protein	hypothetical protein, conserved	2401	Protein of unknown function (DUF3595)	PlasmaMembrane	endoplasmic reticulum membrane	34	36	No	No hits	1	Channel	1.A.75.1.2	Mechanical Nociceptor, Piezo (Piezo) Family	cation channel activity [GO:0005261]; mechanosensitive ion channel activity [GO:0008381]	cellular response to mechanical stimulus [GO:0071260]; detection of mechanical stimulus [GO:0050982]; regulation of membrane potential [GO:0042391]
C4M8B9	EHI_188580	Uncharacterized protein	hypothetical protein, conserved	2166	Protein of unknown function (DUF3595)	PlasmaMembrane	endoplasmic reticulum membrane	31	34	No	No hits	1	Channel	1.A.75.1.2	Mechanical Nociceptor, Piezo (Piezo) Family	cation channel activity [GO:0005261]; mechanosensitive ion channel activity [GO:0008381]	cellular response to mechanical stimulus [GO:0071260]; detection of mechanical stimulus [GO:0050982]; regulation of membrane potential [GO:0042391]
C4M4K5	EHI_031230	Uncharacterized protein	hypothetical protein	486	GWT1	PlasmaMembrane	endoplasmic reticulum membrane	13	13	No	No hits	1	Channel	1.A.75.1.5	Mechanical Nociceptor, Piezo (Piezo) Family	transferase activity, transferring acyl groups [GO:0016746]	GPI anchor biosynthetic process [GO:0006506]
B1N535	EHI_040820	Uncharacterized protein	hypothetical protein	96	OSTC sub-family	PlasmaMembrane	endoplasmic reticulum membrane	3	3	No	No hits	1	Channel	1.A.76.1.12	Magnesium Transporter1 (MagT1) Family
C4LWC8	EHI_096150	Uncharacterized protein	hypothetical protein, conserved	125	OSTC sub-family	PlasmaMembrane	endoplasmic reticulum membrane	3	3	No	Amino Acid/Sugar	1	Channel	1.A.76.2.1	Magnesium Transporter1 (MagT1) Family
C4MB10	EHI_200980	Vesicle transport protein	hypothetical protein, conserved	186	Got1/Sft2-like family	PlasmaMembrane	golgi apparatus membrane	4	4	No	No hits	1	Channel	1.A.77.3.15	Mg2+ /Ca2+ Uniporter (MCU) Family		protein transport [GO:0015031]; vesicle-mediated transport [GO:0016192]
C4M2I0	EHI_054490	Uncharacterized protein	hypothetical protein	132	FAMILY NOT NAMED (PTHR36460)	PlasmaMembrane	golgi apparatus membrane	3	3	No	Anion	1	Channel	1.A.77.3.15	Mg2+ /Ca2+ Uniporter (MCU) Family
C4LTG7	EHI_045560	Uncharacterized protein	hypothetical protein	758	Alpha/beta hydrolase of unknown function (DUF900)	PlasmaMembrane	endoplasmic reticulum membrane	3	4	No	No hits	1	Channel	1.A.77.4.2	Mg2+ /Ca2+ Uniporter (MCU) Family
C4M257	EHI_174090	Uncharacterized protein	hypothetical protein, conserved	745	Alpha/beta hydrolase of unknown function (DUF900)	PlasmaMembrane	endoplasmic reticulum membrane	4	4	No	No hits	1	Channel	1.A.77.4.2	Mg2+ /Ca2+ Uniporter (MCU) Family
C4M8U3	EHI_169620	Uncharacterized protein	hypothetical protein	210	SNARE associated Golgi protein	PlasmaMembrane	endoplasmic reticulum membrane	4	5	No	No hits	1	Channel	1.A.77.4.3	Mg2+ /Ca2+ Uniporter (MCU) Family
C4M7K7	EHI_170400	Uncharacterized protein	hypothetical protein	644	Alpha/beta hydrolase of unknown function (DUF900)	PlasmaMembrane	endoplasmic reticulum membrane	4	4	No	No hits	1	Channel	1.A.77.4.3	Mg2+ /Ca2+ Uniporter (MCU) Family
C4LYT9	EHI_010520	Uncharacterized protein	hypothetical protein	274	Major intrinsic protein family signature	PlasmaMembrane	endoplasmic reticulum membrane	6	6	No	Sugar	1	Channel	1.A.8.12.1	Major Intrinsic Protein (MIP) Family	channel activity [GO:0015267]
C4M405	EHI_195000	Uncharacterized protein	hypothetical protein	314	Major intrinsic protein	PlasmaMembrane	endoplasmic reticulum membrane	7	8	No	Anion/Other	1	Channel	1.A.8.12.10	Major Intrinsic Protein (MIP) Family	channel activity [GO:0015267]
B1N5Y2	EHI_091840	Cysteine surface protein, putative	cysteine surface protein, putative	347	Protein tyrosine kinase	PlasmaMembrane	cytoplasm	1	1	No	No hits	1	Channel	1.A.87.2.4	Mechanosensitive Calcium Channel (MCA) Family	ATP binding [GO:0005524]; protein kinase activity [GO:0004672]
C4LT25	EHI_148550	Protein tyrosine kinase domain-containing protein	protein tyrosine kinase domain-containing protein	1062	Protein tyrosine kinase	PlasmaMembrane	cytoplasm	2	2	No	No hits	1	Channel	1.A.87.2.4	Mechanosensitive Calcium Channel (MCA) Family	ATP binding [GO:0005524]; protein kinase activity [GO:0004672]; signal transducer activity [GO:0004871]	intracellular signal transduction [GO:0035556]; protein phosphorylation [GO:0006468]
C4LTS1	EHI_050480	Tyrosine kinase, putative	tyrosine kinase, putative	1726	Protein tyrosine kinase	PlasmaMembrane	plasma membrane	1	1	Yes	No hits	1	Channel	1.A.87.2.4	Mechanosensitive Calcium Channel (MCA) Family	ATP binding [GO:0005524]; protein serine/threonine kinase activity [GO:0004674]; signal transducer activity [GO:0004871]	intracellular signal transduction [GO:0035556]
C4M3F9	EHI_017760	Tyrosine kinase, putative	tyrosine kinase, putative	1017	Protein tyrosine kinase	PlasmaMembrane	cytoplasm	2	1	No	No hits	1	Channel	1.A.87.2.4	Mechanosensitive Calcium Channel (MCA) Family	ATP binding [GO:0005524]; protein serine/threonine kinase activity [GO:0004674]; signal transducer activity [GO:0004871]	intracellular signal transduction [GO:0035556]
C4M670	EHI_043020	Protein kinase domain containing protein	protein kinase domain containing protein	482	Protein tyrosine kinase	PlasmaMembrane	cytoplasm	1	1	No	No hits	1	Channel	1.A.87.2.4	Mechanosensitive Calcium Channel (MCA) Family	ATP binding [GO:0005524]; protein serine/threonine kinase activity [GO:0004674]; signal transducer activity [GO:0004871]	intracellular signal transduction [GO:0035556]
C4M6T0	EHI_184540	Protein kinase, putative	protein kinase, putative	1055	Protein tyrosine kinase	PlasmaMembrane	cytoplasm	2	1	Yes	No hits	1	Channel	1.A.87.2.4	Mechanosensitive Calcium Channel (MCA) Family	ATP binding [GO:0005524]; protein kinase activity [GO:0004672]; signal transducer activity [GO:0004871]	intracellular signal transduction [GO:0035556]; protein phosphorylation [GO:0006468]
C4M762	EHI_083440	Tyrosine kinase, putative	tyrosine kinase, putative	1228	Protein tyrosine kinase	PlasmaMembrane	cytoplasm	1	0	Yes	No hits	1	Channel	1.A.87.2.4	Mechanosensitive Calcium Channel (MCA) Family	ATP binding [GO:0005524]; protein kinase activity [GO:0004672]; signal transducer activity [GO:0004871]	intracellular signal transduction [GO:0035556]; protein phosphorylation [GO:0006468]
C4LTL5	EHI_012220	Protein kinase domain containing protein	protein kinase domain containing protein	1041	Protein tyrosine kinase	PlasmaMembrane	cytoplasm	2	1	Yes	No hits	1	Channel	1.A.87.2.6	Mechanosensitive Calcium Channel (MCA) Family	ATP binding [GO:0005524]; protein kinase activity [GO:0004672]; signal transducer activity [GO:0004871]	intracellular signal transduction [GO:0035556]; protein phosphorylation [GO:0006468]
C4LTV2	EHI_050820	Tyrosine kinase, putative	tyrosine kinase, putative	1753	Protein tyrosine kinase	PlasmaMembrane	cytoplasm	1	1	Yes	No hits	1	Channel	1.A.87.2.6	Mechanosensitive Calcium Channel (MCA) Family	ATP binding [GO:0005524]; protein serine/threonine kinase activity [GO:0004674]; signal transducer activity [GO:0004871]	intracellular signal transduction [GO:0035556]
C4LU62	EHI_068720	Protein kinase domain containing protein	protein kinase domain containing protein	1052	Protein tyrosine kinase	PlasmaMembrane	cytoplasm	2	1	Yes	No hits	1	Channel	1.A.87.2.6	Mechanosensitive Calcium Channel (MCA) Family	ATP binding [GO:0005524]; protein kinase activity [GO:0004672]; signal transducer activity [GO:0004871]	intracellular signal transduction [GO:0035556]; protein phosphorylation [GO:0006468]
C4LX15	EHI_127440	Tyrosine kinase, putative	tyrosine kinase, putative	1637	Protein tyrosine kinase	PlasmaMembrane	secreted	2	1	Yes	No hits	1	Channel	1.A.87.2.6	Mechanosensitive Calcium Channel (MCA) Family	ATP binding [GO:0005524]; protein serine/threonine kinase activity [GO:0004674]; signal transducer activity [GO:0004871]	intracellular signal transduction [GO:0035556]
C4LYM9	EHI_118810	Protein kinase domain containing protein	protein kinase domain containing protein	1070	Protein tyrosine kinase	PlasmaMembrane	cytoplasm	2	1	Yes	No hits	1	Channel	1.A.87.2.6	Mechanosensitive Calcium Channel (MCA) Family	ATP binding [GO:0005524]; protein kinase activity [GO:0004672]; signal transducer activity [GO:0004871]	intracellular signal transduction [GO:0035556]; protein phosphorylation [GO:0006468]
C4M046	EHI_021310	Receptor protein kinase, putative	receptor protein kinase, putative	1061	Protein tyrosine kinase	PlasmaMembrane	plasma membrane	2	1	Yes	No hits	1	Channel	1.A.87.2.6	Mechanosensitive Calcium Channel (MCA) Family	ATP binding [GO:0005524]; protein kinase activity [GO:0004672]
C4M275	EHI_180150	Protein tyrosine kinase domain-containing protein	protein tyrosine kinase domain-containing protein	1204	Protein tyrosine kinase	PlasmaMembrane	plasma membrane	2	1	Yes	No hits	1	Channel	1.A.87.2.6	Mechanosensitive Calcium Channel (MCA) Family	ATP binding [GO:0005524]; protein kinase activity [GO:0004672]; signal transducer activity [GO:0004871]	intracellular signal transduction [GO:0035556]; protein phosphorylation [GO:0006468]
C4M9R8	EHI_128430	Protein tyrosine kinase domain-containing protein	protein tyrosine kinase domain-containing protein	1072	Protein tyrosine kinase	PlasmaMembrane	cytoplasm	2	1	Yes	No hits	1	Channel	1.A.87.2.6	Mechanosensitive Calcium Channel (MCA) Family	ATP binding [GO:0005524]; protein kinase activity [GO:0004672]; signal transducer activity [GO:0004871]	intracellular signal transduction [GO:0035556]; protein phosphorylation [GO:0006468]
C4M446	EHI_030120	Tyrosine kinase, putative	tyrosine kinase, putative	1348	Growth factor receptor cysteine-rich domain superfamily	PlasmaMembrane	cytoplasm	1	1	Yes	No hits	1	Channel	1.A.87.2.6	Mechanosensitive Calcium Channel (MCA) Family
C4LST1	EHI_152440	Uncharacterized	hypothetical protein	1539	Papain family cysteine protease	PlasmaMembrane	secreted	1	2	Yes	No hits	1	Channel	1.C.75.1.7	Serratia-type Pore-forming Toxin (S-PFT) Family
C4LSA8	EHI_153160	Uncharacterized protein	hypothetical protein	593	tRNA synthetases class II (A)	PlasmaMembrane	endoplasmic reticulum membrane	8	8	No	Anion/Cation	1	Channel	1.C.105.2.10	Bacillus thuringiensis Vegetative Insecticidal Protein-3 (Vip3) Family
C4LSB3	EHI_153210	Uncharacterized protein	hypothetical protein	551	Intramolecular chaperone auto-processing domain	PlasmaMembrane	golgi apparatus membrane	5	5	No	No hits	1	Channel	1.C.105.2.10	Bacillus thuringiensis Vegetative Insecticidal Protein-3 (Vip3) Family
C4M315	EHI_025280	Tyrosine kinase, putative	tyrosine kinase, putative	1124	Legume-like lectin family	PlasmaMembrane	plasma membrane	1	1	Yes	No hits	1	Channel	1.A.87.2.6	Mechanosensitive Calcium Channel (MCA) Family
C4LTM1	EHI_012280	Protein	hypothetical protein, conserved	959	Root hair defective 3 GTP-binding protein (RHD3)	Nuclear	endoplasmic reticulum membrane	2	3	No	No hits	1	Channel	1.C.105.2.10	Bacillus thuringiensis Vegetative Insecticidal Protein-3 (Vip3) Family
C4M613	EHI_072090	Uncharacterized protein	hypothetical protein	640	Intramolecular chaperone auto-processing domain	PlasmaMembrane	cytoplasm	5	5	No	No hits	1	Channel	1.C.105.2.11	Bacillus thuringiensis Vegetative Insecticidal Protein-3 (Vip3) Family
C4M1N7	EHI_062510	Uncharacterized protein	hypothetical protein	350	Sad1 / UNC-like C-terminal	Nuclear	endoplasmic reticulum membrane	1	1	No	No hits	1	Channel	1.C.105.2.11	Bacillus thuringiensis Vegetative Insecticidal Protein-3 (Vip3) Family
C4LW32	EHI_141860	Uncharacterized protein	phosphoinositide phosphatase, putative	586	SacI homology domain	Nuclear	endoplasmic reticulum membrane	2	3	No	No hits	1	Channel	1.C.105.2.5	Bacillus thuringiensis Vegetative Insecticidal Protein-3 (Vip3) Family
C4LWG1	EHI_096480	Uncharacterized protein	hypothetical protein	413	Sad1 / UNC-like C-terminal	Nuclear	endoplasmic reticulum membrane	1	1	No	No hits	1	Channel	1.C.105.2.9	Bacillus thuringiensis Vegetative Insecticidal Protein-3 (Vip3) Family
C4M9P1	EHI_080730	Hemolysin-3, putative	hemolysin-3, putative	277	Haemolysin-III related	PlasmaMembrane	endoplasmic reticulum membrane	7	7	No	No hits	1	Channel	1.C.113.1.1	Hly III (Hly III) Family
C4LTH7	EHI_011810	Uncharacterized protein	hypothetical protein, conserved	272	Eukaryotic and archaeal DNA primase small subunit	PlasmaMembrane	endoplasmic reticulum membrane	1	0	No	Anion/Electron/Proteins/mRNA	1	Channel	1.C.57.3.4	Clostridial Cytotoxin (CCT) Family
B1N449	EHI_037210	Uncharacterized protein	hypothetical protein	297	Alpha/beta hydrolase family	Cytoplasmic	endoplasmic reticulum membrane	1	2	No	Anion/Electron	1	Channel	1.C.57.3.4	Clostridial Cytotoxin (CCT) Family
C4M9N5	EHI_061020	Uncharacterized protein	hypothetical protein	380	Endonuclease/Exonuclease/phosphatase family	PlasmaMembrane	secreted	1	1	No	No hits	1	Channel	1.C.67.1.2	SphH Hemolysin (SphH) Family
C4M9D3	EHI_149730	Uncharacterized protein	hypothetical protein, conserved	400	Vitamin B6 photo-protection and homoeostasis	PlasmaMembrane	secreted	4	2	No	Anion/Other	1	Channel	1.C.8.1.3	Botulinum and Tetanus Toxin (BTT) Family
Q1EPY8	EHI_081370	V-SNARE protein VampD3	vesicle-associated membrane protein, putative	99	Synaptobrevin	Chloroplast	plasma membrane	1	1	No	Proteins/mRNA/Sugar/Other	1	Channel	1.F.1.1.1	Synaptosomal Vesicle Fusion Pore (SVF-Pore) Family
Q1EPZ7	EHI_068480	EhSyntaxin G	hypothetical protein	105	Snare region anchored in the vesicle membrane C-terminus	Chloroplast	golgi apparatus membrane	1	1	No	Proteins/mRNA	1	Channel	1.F.1.1.2	Synaptosomal Vesicle Fusion Pore (SVF-Pore) Family
Q7Z0T4	EHI_170040	Longin-type vesicle-associated membrane protein, putative (Synaptobrevin-like 2)	longin-type vesicle-associated membrane protein, putative	230	Synaptobrevin	PlasmaMembrane	vacuole membrane	1	1	No	Cation/Proteins/MRNA	1	Channel	1.F.1.1.3	Synaptosomal Vesicle Fusion Pore (SVF-Pore) Family	SNAP receptor activity [GO:0005484]; SNARE binding [GO:0000149]	exocytosis [GO:0006887]; vesicle fusion [GO:0006906]
Q1EQ02	EHI_054110	EhSyntaxin C	hypothetical protein	111	t-SNARE coiled-coil homology domain profile.	Nuclear	plasma membrane	1	1	No	No hits	1	Channel	1.F.1.1.3	Synaptosomal Vesicle Fusion Pore (SVF-Pore) Family
Q1EPZ5	EHI_107040	EhSyntaxin I	hypothetical protein	275	SNARE domain	Cytoplasmic	golgi apparatus membrane	1	1	No	Cation/Proteins/mRNA	1	Channel	1.F.1.1.4	Synaptosomal Vesicle Fusion Pore (SVF-Pore) Family
B1N2W5	EHI_098490	Vesicle-associated membrane protein, putative	vesicle-associated membrane protein, putative	144	Synaptobrevin	Cytoplasmic	vacuole membrane	1	1	No	Cation/Proteins/mRNA	1	Channel	1.F.1.1.4	Synaptosomal Vesicle Fusion Pore (SVF-Pore) Family
Q1EPY4	EHI_168380	V-SNARE protein VampH	hypothetical protein	252	Synaptobrevin	Nuclear	plasma membrane	1	1	No	Anion/Cation/Proteins/mRNA	1	Channel	1.F.1.1.4	Synaptosomal Vesicle Fusion Pore (SVF-Pore) Family
Q1EPY7	EHI_022910	Longin-type vesicle-associated membrane protein, putative	longin-type vesicle-associated membrane protein, putative	228	Synaptobrevin	Nuclear	plasma membrane	1	1	No	Anion/Proteins/mRNA	1	Channel	1.F.1.1.4	Synaptosomal Vesicle Fusion Pore (SVF-Pore) Family
Q1EPY9	EHI_170630	V-SNARE protein VampD2	vesicle-associated membrane protein, putative	101	Synaptobrevin	Nuclear	plasma membrane	1	1	No	Proteins/mRNA/Other	1	Channel	1.F.1.1.4	Synaptosomal Vesicle Fusion Pore (SVF-Pore) Family
Q1EPZ0	EHI_054110	V-SNARE protein VampD1	hypothetical protein	127	Synaptobrevin	Nuclear	vacuole membrane	1	1	No	Proteins/mRNA/Other	1	Channel	1.F.1.1.4	Synaptosomal Vesicle Fusion Pore (SVF-Pore) Family
B1N348	EHI_137830	Uncharacterized protein	hypothetical protein	226	Synaptobrevin	PlasmaMembrane	plasma membrane	1	1	No	No hits	1	Channel	1.F.1.1.5	Synaptosomal Vesicle Fusion Pore (SVF-Pore) Family	SNAP receptor activity [GO:0005484]; SNARE binding [GO:0000149]	exocytosis [GO:0006887]; vesicle fusion [GO:0006906]
Q1EPZ6	EHI_116720	EhSyntaxin H	hypothetical protein	214	Snare region anchored in the vesicle membrane C-terminus	Cytoplasmic	golgi apparatus membrane	1	1	No	Proteins/mRNA	1	Channel	1.F.1.1.5	Synaptosomal Vesicle Fusion Pore (SVF-Pore) Family
Q1EQ00	EHI_156430	EhSyntaxin D2	NUF1 protein, putative	114	Snare region anchored in the vesicle membrane C-terminus	Nuclear	golgi apparatus membrane	1	1	No	Cation/Proteins/mRNA	1	Channel	1.F.1.1.5	Synaptosomal Vesicle Fusion Pore (SVF-Pore) Family
Q1EQ01	EHI_117250	EhSyntaxin D1	hypothetical protein, conserved	109	Snare region anchored in the vesicle membrane C-terminus	Nuclear	golgi apparatus membrane	1	1	No	Cation/Proteins/mRNA	1	Channel	1.F.1.1.5	Synaptosomal Vesicle Fusion Pore (SVF-Pore) Family
C4M6U3	EHI_054180	Protein SEY1 homolog 2	GTP-binding protein, putative	825	Protein SEY1 [SEY1].	Cytoplasmic	endoplasmic reticulum membrane	1	3	No hit	No hits	1	Channel	1.N.5.1.6	Endoplasmic Reticulum (ER) Fusion GTPase, Atlastin (Atlastin) Family
C4M5E3	EHI_131980	DnaJ domain containing protein	DnaJ domain containing protein	293	Alpha/beta hydrolase family	PlasmaMembrane	mitochondrion	1	0	Yes	No hits	1	Channel	1.P.1.1.1	Polyoma Virus SV40 ER Penitration Channel (VPEC) Family
C4LVC2	EHI_197050	DnaJ domain containing protein	DnaJ domain containing protein	418	DnaJ domain	PlasmaMembrane	cytoplasm	6	8	No	No hits	1	Channel	1.P.1.1.1	Polyoma Virus SV40 ER Penitration Channel (VPEC) Family
C4LVV4	EHI_125670	DnaJ domain containing protein	DnaJ domain containing protein	444	DnaJ domain	PlasmaMembrane	mitochondrion	9	9	No	No hits	1	Channel	1.P.1.1.1	Polyoma Virus SV40 ER Penitration Channel (VPEC) Family
C4M280	EHI_180300	DnaJ domain containing protein	DnaJ domain containing protein	407	DnaJ domain	PlasmaMembrane	cytoplasm	8	9	No	Cation	1	Channel	1.P.1.1.1	Polyoma Virus SV40 ER Penitration Channel (VPEC) Family
C4LY73	EHI_051790	Uncharacterized protein	hypothetical protein	165	Microsomal signal peptidase 25 kDa subunit (SPC25)	PlasmaMembrane	endoplasmic reticulum membrane	2	2	No	No hits	2	Secondary carriers	2.A.1.1.50	Major Facilitator Superfamily (MFS)	peptidase activity [GO:0008233]	protein targeting to ER [GO:0045047]; signal peptide processing [GO:0006465]
B1N318	EHI_008110	Transporter, major facilitator family	transporter, major facilitator family	508	Major Facilitator Superfamily	PlasmaMembrane	plasma membrane	9	10	No	Cation/Other	2	Secondary carriers	2.A.1.11.6	Major Facilitator Superfamily (MFS)		transmembrane transport [GO:0055085]
C4LTZ2	EHI_067960	Transporter, major facilitator family	transporter, major facilitator family	489	Major Facilitator Superfamily	PlasmaMembrane	plasma membrane	12	12	No	Other	2	Secondary carriers	2.A.1.2.10	Major Facilitator Superfamily (MFS)		transmembrane transport [GO:0055085]
C4M507	EHI_141000	Transporter, major facilitator family	transporter, major facilitator family	520	Major Facilitator Superfamily	PlasmaMembrane	plasma membrane	9	12	No	Amino Acid/Sugar	2	Secondary carriers	2.A.1.2.10	Major Facilitator Superfamily (MFS)	transporter activity [GO:0005215]	transmembrane transport [GO:0055085]
C4LU32	EHI_068400	Major facilitator superfamily transporter, putative	major facilitator superfamily transporter, putative	531	Major Facilitator Superfamily	PlasmaMembrane	golgi apparatus membrane	11	12	No	Other	2	Secondary carriers	2.A.1.2.10	Major Facilitator Superfamily (MFS)		transmembrane transport [GO:0055085]
C4LVA4	EHI_182490	Transporter, major facilitator family	transporter, major facilitator family	529	Major Facilitator Superfamily	PlasmaMembrane	plasma membrane	12	12	No	Anion	2	Secondary carriers	2.A.1.2.10	Major Facilitator Superfamily (MFS)		transmembrane transport [GO:0055085]
C4LVJ8	EHI_103540	Transporter, major facilitator family	transporter, major facilitator family	502	Major Facilitator Superfamily	PlasmaMembrane	plasma membrane	12	12	No	No hits	2	Secondary carriers	2.A.1.2.10	Major Facilitator Superfamily (MFS)		transmembrane transport [GO:0055085]
B1N2F5	EHI_151820	Eukaryotic translation initiation factor 4E, putative	eukaryotic translation initiation factor 4E, putative	169	Alpha/beta hydrolase family	PlasmaMembrane	cytoplasm	1	2	Yes	No hits	2	Secondary carriers	2.A.1.2.35	Major Facilitator Superfamily (MFS)
B1N4W6	EHI_094800	Major facilitator superfamily protein	major facilitator superfamily protein	560	Major Facilitator Superfamily	PlasmaMembrane	plasma membrane	12	12	No	Anion/Cation	2	Secondary carriers	2.A.1.2.40	Major Facilitator Superfamily (MFS)		transmembrane transport [GO:0055085]
C4MB75	EHI_117260	Transporter, major facilitator family	transporter, major facilitator family	531	Major facilitator superfamily (MFS) profile.	PlasmaMembrane	plasma membrane	11	12	No	Amino Acid/Sugar	2	Secondary carriers	2.A.1.2.58	Major Facilitator Superfamily (MFS)	transporter activity [GO:0005215]	transmembrane transport [GO:0055085]
C4M254	EHI_173950	Transporter, major facilitator family	transporter, major facilitator family	528	Major Facilitator Superfamily	PlasmaMembrane	plasma membrane	12	12	No	Amino Acid/Sugar	2	Secondary carriers	2.A.1.2.96	Major Facilitator Superfamily (MFS)	transporter activity [GO:0005215]	transmembrane transport [GO:0055085]
B1N5W6	EHI_015010	Uncharacterized protein	hypothetical protein	294	Vacuole effluxer Atg22 like	PlasmaMembrane	endoplasmic reticulum membrane	7	8	No	No hits	2	Secondary carriers	2.A.1.24.3	Major Facilitator Superfamily (MFS)		transmembrane transport [GO:0055085]
C4LY68	EHI_051720	Transporter, major facilitator family	transporter, major facilitator family	524	Major Facilitator Superfamily	PlasmaMembrane	plasma membrane	11	12	No	Sugar/Other	2	Secondary carriers	2.A.1.24.3	Major Facilitator Superfamily (MFS)		transmembrane transport [GO:0055085]
C4M4T5	EHI_193310	Transporter, major facilitator family	transporter, major facilitator family	519	Major Facilitator Superfamily	PlasmaMembrane	plasma membrane	11	12	No	Sugar/Other	2	Secondary carriers	2.A.1.24.3	Major Facilitator Superfamily (MFS)		transmembrane transport [GO:0055085]
C4LW46	EHI_142010	Uncharacterized protein	hypothetical protein	679	Intramolecular chaperone auto-processing domain	PlasmaMembrane	plasma membrane	5	5	No	No hits	2	Secondary carriers	2.A.1.33.3	Major Facilitator Superfamily (MFS)
C4M404	EHI_194990	Uncharacterized protein	hypothetical protein	577	Major Facilitator Superfamily	PlasmaMembrane	plasma membrane	12	12	No	No hits	2	Secondary carriers	2.A.1.37.1	Major Facilitator Superfamily (MFS)		transmembrane transport [GO:0055085]
C4M022	EHI_134730	Transporter, major facilitator family	transporter, major facilitator family	525	Major Facilitator Superfamily	PlasmaMembrane	plasma membrane	11	12	No	Cation	2	Secondary carriers	2.A.1.37.1	Major Facilitator Superfamily (MFS)		transmembrane transport [GO:0055085]
C4M0A6	EHI_005130	Transporter, major facilitator family	transporter, major facilitator family	496	Major Facilitator Superfamily	PlasmaMembrane	golgi apparatus membrane	10	12	No	Sugar/Other	2	Secondary carriers	2.A.1.46.5	Major Facilitator Superfamily (MFS)		transmembrane transport [GO:0055085]
C4LYT2	EHI_010350	Uncharacterized protein	hypothetical protein	133	FAMILY NOT NAMED (PTHR36460)	PlasmaMembrane	golgi apparatus membrane	3	3	No	No hits	2	Secondary carriers	2.A.1.47.1	Major Facilitator Superfamily (MFS)
C4LVS9	EHI_187120	Major facilitator superfamily protein	major facilitator superfamily protein	516	Major Facilitator Superfamily	PlasmaMembrane	plasma membrane	10	12	No	Anion/Sugar	2	Secondary carriers	2.A.1.49.5	Major Facilitator Superfamily (MFS)		transmembrane transport [GO:0055085]
C4LVP8	EHI_186810	Major facilitator superfamily protein	major facilitator superfamily protein	393	Major Facilitator Superfamily	PlasmaMembrane	plasma membrane	11	12	No	Anion/Cation/Sugar	2	Secondary carriers	2.A.1.58.6	Major Facilitator Superfamily (MFS)
C4LXM1	EHI_073610	Uncharacterized protein	hypothetical protein	418	Major Facilitator superfamily	PlasmaMembrane	endoplasmic reticulum membrane	12	12	No	Amino Acid/Anion	2	Secondary carriers	2.A.1.58.6	Major Facilitator Superfamily (MFS)
C4LSQ0	EHI_152120	Uncharacterized protein	hypothetical protein	256	Transmembrane proteins 14C	PlasmaMembrane	mitochondrion membrane	5	5	No	No hits	2	Secondary carriers	2.A.1.64.3	Major Facilitator Superfamily (MFS)
B1N3K6	EHI_138340	Major facilitator superfamily protein	major facilitator superfamily protein	533	Major Facilitator Superfamily	PlasmaMembrane	golgi apparatus membrane	9	12	No	Cation/Other	2	Secondary carriers	2.A.1.74.2	Major Facilitator Superfamily (MFS)		transmembrane transport [GO:0055085]
C4M4C3	EHI_156230	Transporter, major facilitator family	transporter, major facilitator family	507	Major Facilitator Superfamily	PlasmaMembrane	plasma membrane	9	12	No	Cation	2	Secondary carriers	2.A.1.74.2	Major Facilitator Superfamily (MFS)		transmembrane transport [GO:0055085]
C4LY66	EHI_051700	Transporter, major facilitator family	transporter, major facilitator family	491	Major Facilitator Superfamily	PlasmaMembrane	plasma membrane	12	12	No	Cation/Sugar	2	Secondary carriers	2.A.1.74.2	Major Facilitator Superfamily (MFS)		transmembrane transport [GO:0055085]
C4M1N0	EHI_134010	Transporter, major facilitator family	transporter, major facilitator family	435	Major Facilitator Superfamily	PlasmaMembrane	mitochondrion membrane	12	12	No	Amino Acid/Cation	2	Secondary carriers	2.A.1.74.2	Major Facilitator Superfamily (MFS)		transmembrane transport [GO:0055085]
C4LU91	EHI_110390	Transporter, major facilitator family	transporter, major facilitator family	530	Major facilitator superfamily (MFS) profile.	PlasmaMembrane	golgi apparatus membrane	12	12	No	Amino Acid/Sugar	2	Secondary carriers	2.A.1.75.4	Major Facilitator Superfamily (MFS)
C4LYD9	EHI_008030	Phosphate transporter, putative	phosphate transporter, putative	432	Sugar (and other) transporter	PlasmaMembrane	endoplasmic reticulum membrane	12	12	No	Amino Acid/Sugar	2	Secondary carriers	2.A.1.9.11	Major Facilitator Superfamily (MFS)	transporter activity [GO:0005215]	transmembrane transport [GO:0055085]
C4M550	EHI_078310	Uncharacterized protein	hypothetical protein, conserved	460	Transmembrane protein TauE-like	PlasmaMembrane	golgi apparatus membrane	10	11	No	Cation/Sugar/Other	2	Secondary carriers	2.A.102.5.2	4-Toluene Sulfonate Uptake Permease (TSUP) Family
C4LTE6	EHI_045330	Monoglyceride lipase, putative	unspecified product	284	Alpha/beta hydrolase family	PlasmaMembrane	mitochondrion	2	0	No	No hits	2	Secondary carriers	2.A.117.1.1	Proteobacterial Antimicrobial Compound Efflux (PACE) Family	lipase activity [GO:0016298]	lipid metabolic process [GO:0006629]
C4M6D4	EHI_142870	Uncharacterized protein	hypothetical protein	712	BTB domain profile.	PlasmaMembrane	chloroplast	2	2	No	No hits	2	Secondary carriers	2.A.123.1.17	Sweet; PQ-loop; Saliva; MtN3 (Sweet) Family
C4M0J1	EHI_024490	Phosphatidate cytidylyltransferase, putative	phosphatidate cytidylyltransferase, putative	230	FARNESOL KINASE, CHLOROPLASTIC (PTHR32523:SF7)	PlasmaMembrane	plasma membrane	6	7	Yes	Anion	2	Secondary carriers	2.A.16.3.2	Tellurite-resistance/Dicarboxylate Transporter (TDT) Family	kinase activity [GO:0016301]; nucleotidyltransferase activity [GO:0016779]
C4LSN3	EHI_151940	Amino acid transporter, putative	amino acid transporter, putative	480	Transmembrane amino acid transporter protein	PlasmaMembrane	endoplasmic reticulum membrane	10	10	No	Amino Acid	2	Secondary carriers	2.A.18.10.2	Amino Acid/Auxin Permease (AAAP) Family
C4LZT5	EHI_194200	Amino acid transporter, putative	amino acid transporter, putative	537	Transmembrane amino acid transporter protein	PlasmaMembrane	plasma membrane	11	11	No	Amino Acid	2	Secondary carriers	2.A.18.10.2	Amino Acid/Auxin Permease (AAAP) Family
C4LZU5	EHI_194310	Amino acid transporter, putative	amino acid transporter, putative	508	Transmembrane amino acid transporter protein	PlasmaMembrane	golgi apparatus membrane	11	11	No	Amino Acid	2	Secondary carriers	2.A.18.10.2	Amino Acid/Auxin Permease (AAAP) Family
C4M1Z1	EHI_165090	Amino acid transporter, putative	amino acid transporter, putative	476	Transmembrane amino acid transporter protein	PlasmaMembrane	golgi apparatus membrane	10	11	No	Amino Acid/Sugar	2	Secondary carriers	2.A.18.10.2	Amino Acid/Auxin Permease (AAAP) Family
C4M615	EHI_072120	Amino acid transporter, putative	amino acid transporter, putative	454	Transmembrane amino acid transporter protein	PlasmaMembrane	golgi apparatus membrane	9	11	No	Amino Acid/Anion/Sugar	2	Secondary carriers	2.A.18.10.2	Amino Acid/Auxin Permease (AAAP) Family
C4M8D5	EHI_185430	Amino acid transporter, putative	amino acid transporter, putative	686	Transmembrane amino acid transporter protein	PlasmaMembrane	endoplasmic reticulum membrane	11	11	No	Cation/Other	2	Secondary carriers	2.A.18.10.2	Amino Acid/Auxin Permease (AAAP) Family
C4M8I5	EHI_162180	Amino acid transporter, putative	amino acid transporter, putative	501	Transmembrane amino acid transporter protein	PlasmaMembrane	golgi apparatus membrane	11	11	No	Anion	2	Secondary carriers	2.A.18.10.2	Amino Acid/Auxin Permease (AAAP) Family
C4LTW0	EHI_050900	N-system amino acid transporter 1, putative	N-system amino acid transporter 1, putative	674	Transmembrane amino acid transporter protein	PlasmaMembrane	plasma membrane	10	11	No	Amino Acid	2	Secondary carriers	2.A.18.6.1	Amino Acid/Auxin Permease (AAAP) Family	amino acid transmembrane transporter activity [GO:0015171]	amino acid transmembrane transport [GO:0003333]
C4LV56	EHI_182750	Amino acid transporter, putative	amino acid transporter, putative	390	Transmembrane amino acid transporter protein	PlasmaMembrane	plasma membrane	11	11	No	No hits	2	Secondary carriers	2.A.18.6.1	Amino Acid/Auxin Permease (AAAP) Family	amino acid transmembrane transporter activity [GO:0015171]	amino acid transmembrane transport [GO:0003333]
C4M8E3	EHI_115320	Amino acid transporter, putative	amino acid transporter, putative	421	Transmembrane amino acid transporter protein	PlasmaMembrane	vacuole membrane	10	11	No	Amino Acid/Cation	2	Secondary carriers	2.A.18.6.11	Amino Acid/Auxin Permease (AAAP) Family	amino acid transmembrane transporter activity [GO:0015171]	amino acid transmembrane transport [GO:0003333]
B1N3V2	EHI_122920	N-system amino acid transporter 1, putative	N-system amino acid transporter 1, putative	154	Transmembrane amino acid transporter protein	PlasmaMembrane	vacuole membrane	4	3	No	Cation	2	Secondary carriers	2.A.18.6.13	Amino Acid/Auxin Permease (AAAP) Family	amino acid transmembrane transporter activity [GO:0015171]	amino acid transmembrane transport [GO:0003333]
C4MAA8	EHI_129510	Amino acid transporter, putative	amino acid transporter, putative	393	Transmembrane amino acid transporter protein	PlasmaMembrane	vacuole membrane	11	11	No	No hits	2	Secondary carriers	2.A.18.6.13	Amino Acid/Auxin Permease (AAAP) Family	amino acid transmembrane transporter activity [GO:0015171]	amino acid transmembrane transport [GO:0003333]
C4M142	EHI_107010	N-system amino acid transporter 1, putative	N-system amino acid transporter 1, putative	699	Transmembrane amino acid transporter protein	PlasmaMembrane	plasma membrane	11	11	No	Amino Acid/Cation/Sugar	2	Secondary carriers	2.A.18.6.14	Amino Acid/Auxin Permease (AAAP) Family	amino acid transmembrane transporter activity [GO:0015171]	amino acid transmembrane transport [GO:0003333]
C4M9T9	EHI_190460	Amino acid transporter, putative	amino acid transporter, putative	700	Transmembrane amino acid transporter protein	PlasmaMembrane	plasma membrane	12	11	No	Amino Acid/Anion/Cation/Sugar	2	Secondary carriers	2.A.18.6.14	Amino Acid/Auxin Permease (AAAP) Family	amino acid transmembrane transporter activity [GO:0015171]	amino acid transmembrane transport [GO:0003333]
C4LUD3	EHI_049310	PH domain containing protein	PH domain containing protein	575	Pleckstrin homology domain.	PlasmaMembrane	golgi apparatus membrane	10	9	No	No hits	2	Secondary carriers	2.A.19.4.2	Ca2+:Cation Antiporter (CaCA) Family	calcium, potassium:sodium antiporter activity [GO:0008273]; calcium channel activity [GO:0005262]; calcium ion binding [GO:0005509]; potassium ion binding [GO:0030955]; sodium ion binding [GO:0031402]	cellular calcium ion homeostasis [GO:0006874]
C4M5I8	EHI_001770	Sodium/calcium exchanger protein, putative	sodium/calcium exchanger protein, putative	513	Sodium/calcium exchanger protein	PlasmaMembrane	vacuole membrane	13	13	Yes	Cation	2	Secondary carriers	2.A.19.4.7	Ca2+:Cation Antiporter (CaCA) Family		transmembrane transport [GO:0055085]
C4M246	EHI_169290	Bax inhibitor, putative	Bax inhibitor, putative	213	Bax inhibitor 1-related	PlasmaMembrane	endoplasmic reticulum membrane	7	6	No	No hits	2	Secondary carriers	2.A.2.3.8	Glycoside-Pentoside-Hexuronide (GPH):Cation Symporter Family
C4LSD6	EHI_153450	Transporter, major facilitator family	transporter, major facilitator family	461	Major Facilitator Superfamily	PlasmaMembrane	plasma membrane	12	12	No	Amino Acid/Anion/Cation/Sugar/Other	2	Secondary carriers	2.A.2.4.11	Glycoside-Pentoside-Hexuronide (GPH):Cation Symporter Family		transmembrane transport [GO:0055085]
C4MA32	EHI_175940	Sucrose transporter, putative	sucrose transporter, putative	491	Major Facilitator Superfamily	PlasmaMembrane	plasma membrane	12	12	No	Anion	2	Secondary carriers	2.A.2.4.11	Glycoside-Pentoside-Hexuronide (GPH):Cation Symporter Family		transmembrane transport [GO:0055085]
B1N3M1	EHI_193470 EHI_200720	Uncharacterized protein	signal peptidase complex subunit, putative	93	Microsomal signal peptidase 12 kDa subunit (SPC12)	PlasmaMembrane	endoplasmic reticulum membrane	2	2	No	Anion	2	Secondary carriers	2.A.28.2.3	Bile Acid:Na+ Symporter (BASS) Family	peptidase activity [GO:0008233]	protein targeting to ER [GO:0045047]; signal peptide processing [GO:0006465]
Q8I8D2	EHI_091450	Cysteine protease 16 (Cysteine protease, putative)	cysteine protease, putative	650	Papain family cysteine protease	PlasmaMembrane	plasma membrane	1	1	Yes	No hits	2	Secondary carriers	2.A.28.3.6	Bile Acid:Na+ Symporter (BASS) Family	cysteine-type endopeptidase activity [GO:0004197]	immune response [GO:0006955]; positive regulation of peptidase activity [GO:0010952]; proteolysis involved in cellular protein catabolic process [GO:0051603]
Q8I8D6	EHI_140220	Cysteine protease 12 (Cysteine protease, putative)	cysteine protease, putative	474	Papain family cysteine protease	PlasmaMembrane	secreted	1	1	Yes	No hits	2	Secondary carriers	2.A.28.3.6	Bile Acid:Na+ Symporter (BASS) Family	cysteine-type endopeptidase activity [GO:0004197]	proteolysis involved in cellular protein catabolic process [GO:0051603]
C4M1E2	EHI_030720	Cysteine protease, putative	cysteine protease, putative	444	Serine/Threonine protein kinases, catalytic domain	PlasmaMembrane	secreted	1	1	Yes	No hits	2	Secondary carriers	2.A.28.3.6	Autophagy-related Phagophore-formation Transporter (APT) Family
C4M4S8	EHI_095150	Mitochondrial carrier protein (Mitochondrial carrier protein, putative)	mitochondrial carrier protein, putative	276	Mitochondrial carrier protein	PlasmaMembrane	chloroplast membrane	1	0	No	Amino Acid/Anion/Sugar/Other	2	Secondary carriers	2.A.29.22.2	Mitochondrial Carrier (MC) Family	ADP transmembrane transporter activity [GO:0015217]; ATP transmembrane transporter activity [GO:0005347]	mitochondrial transport [GO:0006839]
C4M7U4	EHI_020320	Amino acid-polyamine transporter, putative	amino acid-polyamine transporter, putative	476	Amino acid permease	PlasmaMembrane	plasma membrane	12	12	No	Cation	2	Secondary carriers	2.A.3.12.1	Amino Acid-Polyamine-Organocation (APC) Superfamily	antiporter activity [GO:0015297]; L-amino acid transmembrane transporter activity [GO:0015179]
C4M0U9	EHI_100280	Amino acid-polyamine transporter, putative	amino acid-polyamine transporter, putative	545	Amino acid permease	PlasmaMembrane	plasma membrane	12	12	No	Amino Acid/Cation	2	Secondary carriers	2.A.3.12.2	Amino Acid-Polyamine-Organocation (APC) Superfamily	antiporter activity [GO:0015297]; L-amino acid transmembrane transporter activity [GO:0015179]
C4M715	EHI_189970	Amino acid permease, putative	amino acid permease, putative	495	Amino acid permease	PlasmaMembrane	plasma membrane	12	12	No	Amino Acid/Other	2	Secondary carriers	2.A.3.12.3	Amino Acid-Polyamine-Organocation (APC) Superfamily	antiporter activity [GO:0015297]; L-amino acid transmembrane transporter activity [GO:0015179]
C4LVG9	EHI_197530	Sodium/hydrogen exchanger	sodium/proton antiporter, putative	561	Sodium/hydrogen exchanger family	PlasmaMembrane	vacuole membrane	13	13	No	Amino Acid/Cation	2	Secondary carriers	2.A.36.1.9	Monovalent Cation:Proton Antiporter-1 (CPA1) Family	potassium:proton antiporter activity [GO:0015386]; sodium:proton antiporter activity [GO:0015385]	potassium ion transmembrane transport [GO:0071805]; regulation of intracellular pH [GO:0051453]; sodium ion import across plasma membrane [GO:0098719]
C4MB25	EHI_176180	Sodium/hydrogen exchanger	sodium/proton antiporter, putative	604	Sodium/hydrogen exchanger family	PlasmaMembrane	golgi apparatus membrane	12	13	No	Amino Acid/Cation	2	Secondary carriers	2.A.36.1.9	Monovalent Cation:Proton Antiporter-1 (CPA1) Family	potassium:proton antiporter activity [GO:0015386]; sodium:proton antiporter activity [GO:0015385]	potassium ion transmembrane transport [GO:0071805]; regulation of intracellular pH [GO:0051453]; sodium ion import across plasma membrane [GO:0098719]
C4LTJ1	EHI_011970	High-affinity potassium uptake transporter, putative	high-affinity potassium uptake transporter, putative	482	Cation transport protein	PlasmaMembrane	plasma membrane	6	7	No	Anion	2	Secondary carriers	2.A.38.2.4	K+ Transporter (Trk) Family	cation transmembrane transporter activity [GO:0008324]
C4LWU8	EHI_199020	High-affinity potassium uptake transporter, putative	high-affinity potassium uptake transporter, putative	733	Cation transport protein	PlasmaMembrane	plasma membrane	6	0	No	Anion/Cation/Sugar	2	Secondary carriers	2.A.38.2.4	K+ Transporter (Trk) Family	cation transmembrane transporter activity [GO:0008324]
C4M9H3	EHI_105870	Phosphatidylinositol N-acetylglucosaminyltransferase subunit A, putative	phosphatidylinositol N-acetylglucosaminyltransferase subunit A, putative	449	Glycosyl transferases group 1	PlasmaMembrane	endoplasmic reticulum membrane	1	2	No	Anion/Electron/Other	2	Secondary carriers	2.A.38.4.5	K+ Transporter (Trk) Family	phosphatidylinositol N-acetylglucosaminyltransferase activity [GO:0017176]	GPI anchor biosynthetic process [GO:0006506]
C4LU69	EHI_110150	Zinc/cadmium transporter, putative	zinc/cadmium transporter, putative	437	Cation efflux family	PlasmaMembrane	mitochondrion membrane	6	6	No	Anion/Electron/Proteins/mRNA	2	Secondary carriers	2.A.4.2.2	Cation Diffusion Facilitator (CDF) Family	zinc ion transmembrane transporter activity [GO:0005385]	regulation of sequestering of zinc ion [GO:0061088]; response to zinc ion [GO:0010043]
C4MA64	EHI_069990	Zinc transporter, putative	zinc transporter, putative	439	Cation efflux family	PlasmaMembrane	mitochondrion membrane	6	6	No	Anion/Proteins/mRNA	2	Secondary carriers	2.A.4.2.7	Cation Diffusion Facilitator (CDF) Family	zinc ion transmembrane transporter activity [GO:0005385]	regulation of sequestering of zinc ion [GO:0061088]; response to zinc ion [GO:0010043]
C4M312	EHI_025250	Cation transporter, putative	cation transporter, putative	314	Cation efflux family	PlasmaMembrane	golgi apparatus membrane	6	6	No	Sugar	2	Secondary carriers	2.A.4.4.3	Cation Diffusion Facilitator (CDF) Family	zinc ion transmembrane transporter activity [GO:0005385]	regulation of sequestering of zinc ion [GO:0061088]; response to zinc ion [GO:0010043]
C4M5V5	EHI_026390	Cation transporter, putative	cation transporter, putative	471	Cation efflux family	PlasmaMembrane	golgi apparatus membrane	9	9	No	Amino Acid/Cation	2	Secondary carriers	2.A.4.4.3	Cation Diffusion Facilitator (CDF) Family	zinc ion transmembrane transporter activity [GO:0005385]	regulation of sequestering of zinc ion [GO:0061088]; response to zinc ion [GO:0010043]
C4M4F2	EHI_078700	Cation transporter, putative	cation transporter, putative	372	Cation efflux family	PlasmaMembrane	plasma membrane	6	6	No	Cation/Other	2	Secondary carriers	2.A.4.5.3	Cation Diffusion Facilitator (CDF) Family	cation transmembrane transporter activity [GO:0008324]
C4LVF7	EHI_197410	Cation transporter, putative	cation transporter, putative	371	Cation efflux family	PlasmaMembrane	secreted	5	6	No	Cation/Electron	2	Secondary carriers	2.A.4.5.5	Cation Diffusion Facilitator (CDF) Family	cation transmembrane transporter activity [GO:0008324]
C4LSG6	EHI_151230	PQ loop repeat protein	PQ loop repeat protein	228	PQ loop repeat	PlasmaMembrane	plasma membrane	6	6	No	Anion/Cation/Sugar	2	Secondary carriers	2.A.43.2.13	Lysosomal Cystine Transporter (LCT) Family
C4LT11	EHI_148410	PQ loop repeat protein	PQ loop repeat protein	320	PQ loop repeat	PlasmaMembrane	vacuole membrane	7	7	No	Anion/Other	2	Secondary carriers	2.A.43.2.4	Lysosomal Cystine Transporter (LCT) Family	basic amino acid transmembrane transporter activity [GO:0015174]
C4M7F6	EHI_035970	Mannose-P-dolichol utilization defect 1 protein homolog, putative	PQ loop repeat protein	212	PQ loop repeat	PlasmaMembrane	endoplasmic reticulum membrane	7	7	No	No hits	2	Secondary carriers	2.A.43.3.1	Lysosomal Cystine Transporter (LCT) Family		dolichol-linked oligosaccharide biosynthetic process [GO:0006488]
B1N5T2	EHI_072250	Uncharacterized protein	hypothetical protein	224	PQ loop repeat	PlasmaMembrane	golgi apparatus membrane	5	5	Yes	Anion/Sugar	2	Secondary carriers	2.A.43.4.1	Lysosomal Cystine Transporter (LCT) Family
C4LVU2	EHI_187250	PQ loop repeat protein	PQ loop repeat protein	363	PQ loop repeat	PlasmaMembrane	plasma membrane	8	7	Yes	Anion/Other	2	Secondary carriers	2.A.43.4.1	Lysosomal Cystine Transporter (LCT) Family
C4M161	EHI_107200	PQ loop repeat protein	PQ loop repeat protein	308	PQ loop repeat	PlasmaMembrane	plasma membrane	7	7	Yes	Anion/Sugar	2	Secondary carriers	2.A.43.4.1	Lysosomal Cystine Transporter (LCT) Family
C4M853	EHI_052130	Uncharacterized protein	hypothetical protein, conserved	302	PQ loop repeat	PlasmaMembrane	golgi apparatus membrane	8	7	Yes	Anion	2	Secondary carriers	2.A.43.4.1	Lysosomal Cystine Transporter (LCT) Family
C4M8Q6	EHI_132430	PQ loop repeat protein	PQ loop repeat protein	364	PQ loop repeat	PlasmaMembrane	plasma membrane	7	7	Yes	Other	2	Secondary carriers	2.A.43.4.1	Lysosomal Cystine Transporter (LCT) Family
C4LT55	EHI_148880	Sodium/sulfate symporter, putative	citrate transporter, putative	691	Citrate transporter	PlasmaMembrane	plasma membrane	12	14	No	Anion/Cation	2	Secondary carriers	2.A.47.4.5	Divalent Anion:Na+ Symporter (DASS) Family	cation transmembrane transporter activity [GO:0008324]	potassium ion transport [GO:0006813]
C4LY12	EHI_177580	Sodium/sulfate symporter, putative	citrate transporter, putative	657	Citrate transporter	PlasmaMembrane	plasma membrane	11	14	No	Anion/Cation	2	Secondary carriers	2.A.47.4.5	Divalent Anion:Na+ Symporter (DASS) Family	cation transmembrane transporter activity [GO:0008324]	potassium ion transport [GO:0006813]
C4M0X1	EHI_015330	Sodium/sulfate symporter, putative	citrate transporter, putative	689	Citrate transporter	PlasmaMembrane	plasma membrane	9	14	No	Anion/Cation	2	Secondary carriers	2.A.47.4.5	Divalent Anion:Na+ Symporter (DASS) Family		transmembrane transport [GO:0055085]
C4M6M7	EHI_147510	Sodium/sulfate symporter, putative	citrate transporter, putative	784	RCK C-terminal domain profile.	PlasmaMembrane	plasma membrane	13	0	No	Amino Acid/Anion	2	Secondary carriers	2.A.47.4.5	Divalent Anion:Na+ Symporter (DASS) Family	cation transmembrane transporter activity [GO:0008324]	potassium ion transport [GO:0006813]
C4M8D1	EHI_185600	Sodium/sulfate symporter, putative	citrate transporter, putative	691	RCK C-terminal domain profile.	PlasmaMembrane	plasma membrane	13	15	No	No hits	2	Secondary carriers	2.A.47.4.6	Divalent Anion:Na+ Symporter (DASS) Family	cation transmembrane transporter activity [GO:0008324]	potassium ion transport [GO:0006813]
C4LVQ3	EHI_186860	Chloride channel protein	chloride channel protein 2, putative	676	Voltage gated chloride channel	PlasmaMembrane	plasma membrane	12	12	No	Amino Acid	2	Secondary carriers	2.A.49.2.7	Chloride Carrier/Channel (ClC) Family	voltage-gated chloride channel activity [GO:0005247]	chloride transmembrane transport [GO:1902476]
Q70S43	EHI_142170	Chloride channel protein	chloride channel protein 2, putative	668	Voltage gated chloride channel	PlasmaMembrane	plasma membrane	11	11	No	Amino Acid/Anion/Cation	2	Secondary carriers	2.A.49.2.7	Chloride Carrier/Channel (ClC) Family	voltage-gated chloride channel activity [GO:0005247]	chloride transmembrane transport [GO:1902476]
C4MBG1	EHI_030600	Zinc transporter, putative	metal cation transporter, zinc (Zn2 )-iron (Fe2 ) permease (ZIP) family	298	ZIP Zinc transporter	PlasmaMembrane	plasma membrane	8	8	No	Cation	2	Secondary carriers	2.A.5.3.1	Zinc (Zn2+)-Iron (Fe2+) Permease (ZIP) Family	zinc ion transmembrane transporter activity [GO:0005385]	zinc II ion transmembrane transport [GO:0071577]
C4LSV9	EHI_152760	Metal cation transporter, zinc (Zn2 )-iron (Fe2 ) permease (ZIP) family (Zinc transporter, putative)	metal cation transporter, zinc (Zn2 )-iron (Fe2 ) permease (ZIP) family	289	ZIP Zinc transporter	PlasmaMembrane	plasma membrane	6	8	No	Cation	2	Secondary carriers	2.A.5.3.5	Zinc (Zn2+)-Iron (Fe2+) Permease (ZIP) Family	zinc ion transmembrane transporter activity [GO:0005385]	zinc II ion transmembrane transport [GO:0071577]
C4LVL2	EHI_103680	Zinc transporter, putative	metal cation transporter, zinc (Zn2 )-iron (Fe2 ) permease (ZIP) family	275	ZIP Zinc transporter	PlasmaMembrane	endoplasmic reticulum membrane	6	8	No	Amino Acid/Other	2	Secondary carriers	2.A.5.5.5	Zinc (Zn2+)-Iron (Fe2+) Permease (ZIP) Family	zinc ion transmembrane transporter activity [GO:0005385]	zinc II ion transmembrane transport [GO:0071577]
C4MA21	EHI_039590	Uncharacterized protein	hypothetical protein, conserved	483	MBOAT, membrane-bound O-acyltransferase family	PlasmaMembrane	endoplasmic reticulum membrane	9	11	No	No hits	2	Secondary carriers	2.A.50.2.1	Glycerol Uptake (GUP) Family
C4M8V2	EHI_169580	Nucleoside transporter, putative	nucleoside transporter, putative	379	Nucleoside transporter	PlasmaMembrane	plasma membrane	10	10	No	Amino Acid/Anion	2	Secondary carriers	2.A.57.1.8	Equilibrative Nucleoside Transporter (ENT) Family	nucleoside transmembrane transporter activity [GO:0005337]
C4LUC0	EHI_110730	Nucleoside transporter, putative	nucleoside transporter, putative	487	Nucleoside transporter	PlasmaMembrane	endoplasmic reticulum membrane	11	11	No	Anion	2	Secondary carriers	2.A.57.2.4	Equilibrative Nucleoside Transporter (ENT) Family	nucleoside transmembrane transporter activity [GO:0005337]
C4MAK6	EHI_017040	Nucleoside transporter, putative	nucleoside transporter, putative	481	Nucleoside transporter	PlasmaMembrane	endoplasmic reticulum membrane	11	11	No	No hits	2	Secondary carriers	2.A.57.2.7	Equilibrative Nucleoside Transporter (ENT) Family	nucleoside transmembrane transporter activity [GO:0005337]
C4LW60	EHI_142150	Battenin	BTN1 protein, putative	445	CLN3 protein	PlasmaMembrane	vacuole membrane	11	11	No	Anion/Sugar	2	Secondary carriers	2.A.57.5.6	Equilibrative Nucleoside Transporter (ENT) Family		arginine transport [GO:0015809]; cell-cell adhesion [GO:0098609]; cell-substrate adhesion [GO:0031589]; negative regulation of cell proliferation [GO:0008285]; negative regulation of protein secretion [GO:0050709]; pinocytosis [GO:0006907]; positive regulation of protein secretion [GO:0050714]; regulation of intracellular pH [GO:0051453]; regulation of sorocarp development [GO:0031156]; vacuolar …
C4LZY4	EHI_065680	MmpL efflux pump, putative	MmpL efflux pump, putative	840	MMPL family	PlasmaMembrane	golgi apparatus membrane	12	12	No	Anion/Cation	2	Secondary carriers	2.A.6.5.5	Resistance-Nodulation-Cell Division (RND) Superfamily
C4M1F4	EHI_030870	MmpL efflux pump, putative	MmpL efflux pump, putative	843	MMPL family	PlasmaMembrane	golgi apparatus membrane	12	12	No	No hits	2	Secondary carriers	2.A.6.5.6	Resistance-Nodulation-Cell Division (RND) Superfamily
C4M1I3	EHI_000920	MmpL efflux pump, putative	MmpL efflux pump, putative	779	MMPL family	PlasmaMembrane	golgi apparatus membrane	12	12	No	Anion/Cation	2	Secondary carriers	2.A.6.5.6	Resistance-Nodulation-Cell Division (RND) Superfamily
C4M8X7	EHI_080220	Niemann-Pick C1 protein, putative	Niemann-Pick C1 protein, putative	1339	Patched family	PlasmaMembrane	plasma membrane	16	15	Yes	Anion/Other	2	Secondary carriers	2.A.6.6.12	Resistance-Nodulation-Cell Division (RND) Superfamily
C4M4G8	EHI_042140	Aldehyde dehydrogenase	aldehyde dehydrogenase 1, putative	529	Aldehyde dehydrogenase family	PlasmaMembrane	cytoplasm	1	1	No	Anion/Cation/Electron	2	Secondary carriers	2.A.65.1.1	Bilirubin Transporter (BRT) Family	aldehyde dehydrogenase [NAD(P)+] activity [GO:0004030]	cellular aldehyde metabolic process [GO:0006081]
C4LSG7	EHI_151240	0ligosaccharide translocation protein RFT1, putative	0ligosaccharide translocation protein RFT1, putative	495	Rft protein	PlasmaMembrane	endoplasmic reticulum membrane	10	12	No	Anion	2	Secondary carriers	2.A.66.3.3	The Multidrug/Oligosaccharidyl-lipid/Polysaccharide (MOP) Flippase Superfamily, Oligosaccharidyl-lipid Flippase (OLF) Family	lipid transporter activity [GO:0005319]	glycolipid translocation [GO:0034203]
C4M325	EHI_025380	Hypothetical membrane-spanning protein	hypothetical membrane-spanning protein	421	Lung seven transmembrane receptor	PlasmaMembrane	endoplasmic reticulum membrane	7	7	No	No hits	2	Secondary carriers	2.A.66.3.4	Multidrug/Oligosaccharidyl-lipid/Polysaccharide (MOP) Flippase Superfamily
C4M416	EHI_195130	Auxin efflux carrier family protein, putative	transporter, auxin efflux carrier (AEC) family	426	Membrane transport protein	PlasmaMembrane	endoplasmic reticulum membrane	10	10	No	Amino Acid/Anion/Other	2	Secondary carriers	2.A.69.2.4	Auxin Efflux Carrier (AEC) Family		transmembrane transport [GO:0055085]
C4M583	EHI_111850	Auxin efflux carrier family protein, putative	transporter, auxin efflux carrier (AEC) family	523	Membrane transport protein	PlasmaMembrane	cytoplasm	10	9	No	Cation/Electron	2	Secondary carriers	2.A.69.2.4	Auxin Efflux Carrier (AEC) Family		transmembrane transport [GO:0055085]
C4MAS5	EHI_048980	Auxin efflux carrier family protein, putative	transporter, auxin efflux carrier (AEC) family	485	Membrane transport protein	PlasmaMembrane	golgi apparatus membrane	10	10	No	No hits	2	Secondary carriers	2.A.69.2.4	Auxin Efflux Carrier (AEC) Family		transmembrane transport [GO:0055085]
C4M0G2	EHI_006890	Uncharacterized protein	hypothetical protein, conserved	351	Membrane transport protein	PlasmaMembrane	endoplasmic reticulum membrane	6	8	No	No hits	2	Channel	2.A.69.4.6	Auxin Efflux Carrier		transmembrane transport [GO:0055085]
B1N4Q4	EHI_041050 EHI_068590	UDP-galactose transporter-related protein 1, putative	UDP-galactose transporter-related protein 1, putative	335	UAA transporter family	PlasmaMembrane	endoplasmic reticulum membrane	8	9	No	Sugar	2	Secondary carriers	2.A.7.11.1	Drug/Metabolite Transporter (DMT) Superfamily	UDP-galactose transmembrane transporter activity [GO:0005459]	UDP-galactose transmembrane transport [GO:0072334]
B1N2N7	EHI_092680	Uncharacterized protein	hypothetical protein, conserved	400	Nucleotide-sugar transporter	PlasmaMembrane	golgi apparatus membrane	10	10	No	Cation/Sugar	2	Secondary carriers	2.A.7.12.13	Drug/Metabolite Transporter (DMT) Superfamily
B1N4Z2	EHI_136740	Uncharacterized protein (Fragment)	hypothetical protein, conserved	187	Nucleotide-sugar transporter	PlasmaMembrane	golgi apparatus membrane	5	5	No	Electron/Sugar	2	Secondary carriers	2.A.7.12.13	Drug/Metabolite Transporter (DMT) Superfamily
C4M904	EHI_147870	Uncharacterized protein	hypothetical protein, conserved	402	EamA-like transporter family	PlasmaMembrane	golgi apparatus membrane	10	10	No	Anion/Cation	2	Secondary carriers	2.A.7.12.13	Drug/Metabolite Transporter (DMT) Superfamily
C4LST4	EHI_152470	Uncharacterized protein	hypothetical protein, conserved	469	EamA-like transporter family	PlasmaMembrane	golgi apparatus membrane	10	10	No	Anion	2	Secondary carriers	2.A.7.12.13	Drug/Metabolite Transporter (DMT) Superfamily
C4LUG1	EHI_049600	Uncharacterized protein	hypothetical protein, conserved	394	EamA-like transporter family	PlasmaMembrane	golgi apparatus membrane	10	10	No	Anion/Cation	2	Secondary carriers	2.A.7.12.13	Drug/Metabolite Transporter (DMT) Superfamily
C4LXI1	EHI_131130	Uncharacterized protein	hypothetical protein, conserved	406	EamA-like transporter family	PlasmaMembrane	golgi apparatus membrane	10	10	No	Anion	2	Secondary carriers	2.A.7.12.13	Drug/Metabolite Transporter (DMT) Superfamily
C4M0G7	EHI_006940	Uncharacterized protein	hypothetical protein, conserved	368	EamA-like transporter family	PlasmaMembrane	golgi apparatus membrane	9	9	No	Sugar	2	Secondary carriers	2.A.7.12.13	Drug/Metabolite Transporter (DMT) Superfamily
C4LTQ4	EHI_050270	UDP-N-acetylglucosamine transporter, putative	UDP-N-acetylglucosamine transporter, putative	318	Nucleotide-sugar transporter	PlasmaMembrane	golgi apparatus membrane	10	10	Yes	Cation/Sugar	2	Secondary carriers	2.A.7.12.16	Drug/Metabolite Transporter (DMT) Superfamily	sugar:proton symporter activity [GO:0005351]
C4LZJ2	EHI_124580	UDP-N-acetylglucosamine transporter, putative	UDP-N-acetylglucosamine transporter, putative	389	Nucleotide-sugar transporter	PlasmaMembrane	golgi apparatus membrane	10	10	No	Cation	2	Secondary carriers	2.A.7.12.16	Drug/Metabolite Transporter (DMT) Superfamily	sugar:proton symporter activity [GO:0005351]
C4M1U9	EHI_027630	Hypothetical membrane-spanning protein	hypothetical membrane-spanning protein	324	Solute carrier family 35 member	PlasmaMembrane	golgi apparatus membrane	9	10	No	Cation	2	Secondary carriers	2.A.7.24.10	Drug/Metabolite Transporter (DMT) Superfamily, The Thiamine Pyrophosphate Transporter (TPPT) Family	transmembrane transporter activity [GO:0022857]
C4M793	EHI_044210	Monoglyceride lipase, putative	hydrolase, alpha/beta fold family domain containing protein	285	Alpha/beta hydrolase family	PlasmaMembrane	mitochondrion	2	0	No	Anion/Electron/Other	2	Secondary carriers	2.A.7.28.2	Drug/Metabolite Transporter (DMT) Superfamily	lipase activity [GO:0016298]	lipid metabolic process [GO:0006629]
C4M4F8	EHI_041930	Uncharacterized protein	hypothetical protein, conserved	151	Uncharacterised protein family UPF0546	PlasmaMembrane	golgi apparatus membrane	4	5	No	Anion/Cation	2	Secondary carriers	2.A.7.32.3	Drug/Metabolite Transporter (DMT) Superfamily
C4M705	EHI_057700	Uncharacterized protein	hypothetical protein, conserved	399	CEO family (DUF1632)	PlasmaMembrane	golgi apparatus membrane	10	10	No	Amino Acid/Anion/Sugar	2	Secondary carriers	2.A.7.8.1	Drug/Metabolite Transporter (DMT) Superfamily	carbohydrate transmembrane transporter activity [GO:0015144]
C4LWQ6	EHI_198600	Uncharacterized protein	hypothetical protein, conserved	404	CEO family (DUF1632)	PlasmaMembrane	golgi apparatus membrane	10	10	No	Amino Acid/Anion/Sugar	2	Secondary carriers	2.A.7.8.2	Drug/Metabolite Transporter (DMT) Superfamily	carbohydrate transmembrane transporter activity [GO:0015144]
C4LZU8	EHI_194340	Uncharacterized protein	hypothetical protein, conserved	398	CEO family (DUF1632)	PlasmaMembrane	golgi apparatus membrane	10	10	No	Amino Acid/Sugar	2	Secondary carriers	2.A.7.8.2	Drug/Metabolite Transporter (DMT) Superfamily	carbohydrate transmembrane transporter activity [GO:0015144]
C4M0H6	EHI_007030	Uncharacterized protein	hypothetical protein, conserved	370	CEO family (DUF1632)	PlasmaMembrane	golgi apparatus membrane	10	9	No	Amino Acid/Anion/Sugar	2	Secondary carriers	2.A.7.8.2	Drug/Metabolite Transporter (DMT) Superfamily	carbohydrate transmembrane transporter activity [GO:0015144]
C4M9J3	EHI_107660	Uncharacterized protein	hypothetical protein, conserved	413	CEO family (DUF1632)	PlasmaMembrane	golgi apparatus membrane	10	10	No	Amino Acid/Anion	2	Secondary carriers	2.A.7.8.2	Drug/Metabolite Transporter (DMT) Superfamily	carbohydrate transmembrane transporter activity [GO:0015144]
C4LWP6	EHI_069580	Uncharacterized protein	hypothetical protein, conserved	383	CEO family (DUF1632)	PlasmaMembrane	golgi apparatus membrane	10	10	No	Amino Acid/Cation/Sugar	2	Secondary carriers	2.A.7.8.2	Drug/Metabolite Transporter (DMT) Superfamily	carbohydrate transmembrane transporter activity [GO:0015144]
C4LSF3	EHI_153730	Uncharacterized protein	hypothetical protein	356	Organic solute transporter Ostalpha	PlasmaMembrane	endoplasmic reticulum membrane	7	7	No	No hits	2	Secondary carriers	2.A.82.1.3	Organic Solute Transporter (OST) Family	transporter activity [GO:0005215]
C4M2P5	EHI_006110	Uncharacterized protein	hypothetical protein	361	Domain of unknown function DUF20	PlasmaMembrane	golgi apparatus membrane	8	10	No	Anion/Cation	2	Secondary carriers	2.A.86.1.3	Autoinducer-2 Exporter (AI-2E) Family (formerly the PerM Family, TC #9.B.22)
C4LVC4	EHI_197070	Steroid 5-alpha reductase, putative	steroid 5-alpha reductase, putative	252	3-oxo-5-alpha-steroid 4-dehydrogenase	PlasmaMembrane	endoplasmic reticulum membrane	6	7	No	No hits	2	Secondary carriers	2.A.90.3.2	Vitamin A Receptor/Transporter (STRA6) Family	3-oxo-5-alpha-steroid 4-dehydrogenase activity [GO:0003865]	steroid biosynthetic process [GO:0006694]
C4LTB8	EHI_045030	Uncharacterized protein	trans-2,3-enoyl-CoA reductase, putative	264	3-oxo-5-alpha-steroid 4-dehydrogenase	PlasmaMembrane	endoplasmic reticulum membrane	4	5	No	No hits	2	Secondary carriers	2.A.90.3.2	Vitamin A Receptor/Transporter (STRA6) Family	oxidoreductase activity [GO:0016491]; oxidoreductase activity, acting on the CH-CH group of donors [GO:0016627]	very long-chain fatty acid biosynthetic process [GO:0042761]
C4M0Z7	EHI_135110	Uncharacterized protein	hypothetical protein	287	3-oxo-5-alpha-steroid 4-dehydrogenase	PlasmaMembrane	endoplasmic reticulum membrane	5	5	No	No hits	2	Secondary carriers	2.A.90.3.2	Vitamin A Receptor/Transporter (STRA6) Family	oxidoreductase activity [GO:0016491]; oxidoreductase activity, acting on the CH-CH group of donors [GO:0016627]	very long-chain fatty acid biosynthetic process [GO:0042761]
C4M2S8	EHI_076870	3-oxo-5-alpha-steroid 4-dehydrogenase domain-containing protein (Steroid 5-alpha reductase, putative)	3-oxo-5-alpha-steroid 4-dehydrogenase domain-containing protein	285	3-oxo-5-alpha-steroid 4-dehydrogenase	PlasmaMembrane	endoplasmic reticulum membrane	4	5	No	No hits	2	Secondary carriers	2.A.90.3.2	Vitamin A Receptor/Transporter (STRA6) Family	oxidoreductase activity [GO:0016491]; oxidoreductase activity, acting on the CH-CH group of donors [GO:0016627]	very long-chain fatty acid biosynthetic process [GO:0042761]
C4M8B4	EHI_101290	Uncharacterized protein	hypothetical protein, conserved	476	Plasma-membrane choline transporter	PlasmaMembrane	golgi apparatus membrane	8	10	No	Anion	2	Secondary carriers	2.A.92.1.9	Choline Transporter-like (CTL) Family
C4M3S6	EHI_052880	Uncharacterized protein	hypothetical protein	1784	tolA_full: protein TolA	PlasmaMembrane	nucleus	1	1	Yes	No hits	2	Secondary carriers	2.C.1.2.1	TonB-ExbB-ExbD/TolA-TolQ-TolR Outer Membrane Receptor Energizers and Stabilizers (TonB/TolA) Family	transporter activity [GO:0005215]	bacteriocin transport [GO:0043213]; ion transport [GO:0006811]
C4LTR1	EHI_050360	Oxysterol binding protein, putative	oxysterol binding protein, putative	719	Oxysterol-binding protein	Nuclear	endoplasmic reticulum membrane	1	1	No	No hits	2	Secondary carriers	2.D.1.1.1	PI4P/PS Counter Transporter (P/P-CT) Family
C4M380	EHI_086250	Oxysterol binding protein, putative	oxysterol-binding protein, putative	698	Oxysterol-binding protein	Cytoplasmic	endoplasmic reticulum membrane	1	1	No	No hits	2	Secondary carriers	2.D.1.1.2	PI4P/PS Counter Transporter (P/P-CT) Family
C4LVS2	EHI_187050	Uncharacterized protein	hypothetical protein	489	Intramolecular chaperone auto-processing domain	PlasmaMembrane	plasma membrane	5	5	No	No hits	3	Primary active transporter	3.A.1.1.22	ATP-binding Cassette (ABC) Superfamily
B1N556	EHI_029830	Uncharacterized protein	hypothetical protein, conserved	211	Cleft lip and palate transmembrane protein 1 (CLPTM1)	PlasmaMembrane	endoplasmic reticulum membrane	3	3	No	No hits	3	Primary active transporter	3.A.1.105.20	ATP-binding Cassette (ABC) Superfamily
C4LW13	EHI_126280	Uncharacterized protein	hypothetical protein, conserved	337	GPI transamidase subunit PIG-U	PlasmaMembrane	endoplasmic reticulum membrane	7	9	No	No hits	3	Primary active transporter	3.A.1.147.6	ATP-binding Cassette (ABC) Superfamily		attachment of GPI anchor to protein [GO:0016255]
B1N3U1	EHI_081130	p-glycoprotein 6, putative	P-glycoprotein 6, putative	524	ABC transporter	PlasmaMembrane	plasma membrane	5	5	No	Amino Acid/Sugar/Other	3	Primary active transporter	3.A.1.201.1	ATP-binding Cassette (ABC) Superfamily	ATPase activity, coupled to transmembrane movement of substances [GO:0042626]; ATP binding [GO:0005524]
C4M3B2	EHI_175450	p-glycoprotein-5	P-glycoprotein-5	1296	ABC transporter transmembrane region	PlasmaMembrane	plasma membrane	11	0	No	Anion/Proteins/mRNA/Sugar/Other	3	Primary active transporter	3.A.1.201.1	ATP-binding Cassette (ABC) Superfamily	ATPase activity, coupled to transmembrane movement of substances [GO:0042626]; ATP binding [GO:0005524]
C4M3W0	EHI_016380	Multidrug resistance protein 2, putative	P-glycoprotein-2	1312	ABC transporter transmembrane region	PlasmaMembrane	plasma membrane	11	12	No	Sugar/Other	3	Primary active transporter	3.A.1.201.1	ATP-binding Cassette (ABC) Superfamily	ATPase activity, coupled to transmembrane movement of substances [GO:0042626]; ATP binding [GO:0005524]
C4M422	EHI_114150	p-glycoprotein-1	P-glycoprotein-1	1302	ABC transporter transmembrane region	PlasmaMembrane	plasma membrane	9	12	No	Anion/Proteins/mRNA/Sugar/Other	3	Primary active transporter	3.A.1.201.1	ATP-binding Cassette (ABC) Superfamily	ATPase activity, coupled to transmembrane movement of substances [GO:0042626]; ATP binding [GO:0005524]
B1N2Q9	EHI_186600	p-glycoprotein-2, putative	P-glycoprotein-2, putative	413	ABC transporter integral membrane type-1 fused domain profile.	PlasmaMembrane	mitochondrion membrane	4	3	No	Proteins/mRNA/Sugar	3	Primary active transporter	3.A.1.201.15	ATP-binding Cassette (ABC) Superfamily	ATPase activity, coupled to transmembrane movement of substances [GO:0042626]; ATP binding [GO:0005524]
C4M9Z7	EHI_125030	p-glycoprotein 5, putative	P-glycoprotein 5, putative	609	ABC transporter transmembrane region	PlasmaMembrane	plasma membrane	6	6	No	Anion/Sugar	3	Primary active transporter	3.A.1.201.16	ATP-binding Cassette (ABC) Superfamily	ATPase activity, coupled to transmembrane movement of substances [GO:0042626]; ATP binding [GO:0005524]
B1N2J5	EHI_050640	p-glycoprotein 6, putative	P-glycoprotein 6, putative	451	ABC transporter	PlasmaMembrane	plasma membrane	4	4	No	Anion/Sugar	3	Primary active transporter	3.A.1.201.23	ATP-binding Cassette (ABC) Superfamily	ATPase activity, coupled to transmembrane movement of substances [GO:0042626]; ATP binding [GO:0005524]
C4LVN6	EHI_186350	p-glycoprotein-2	P-glycoprotein-2	1310	ABC transporter	PlasmaMembrane	plasma membrane	11	12	No	Sugar/Other	3	Primary active transporter	3.A.1.201.24	ATP-binding Cassette (ABC) Superfamily	ATPase activity, coupled to transmembrane movement of substances [GO:0042626]; ATP binding [GO:0005524]
B1N521	EHI_075410	p-glycoprotein 5, putative	P-glycoprotein 5, putative	290	ABC transporter integral membrane type-1 fused domain profile.	PlasmaMembrane	plasma membrane	5	5	No	Anion/Sugar	3	Primary active transporter	3.A.1.201.29	ATP-binding Cassette (ABC) Superfamily	ATPase activity, coupled to transmembrane movement of substances [GO:0042626]; ATP binding [GO:0005524]
C4LSW6	EHI_152830	ATP-binding cassette sub-family G1, putative	ATP-binding cassette sub-family G1, putative	409	ABC-2 type transporter	PlasmaMembrane	plasma membrane	5	6	No	No hits	3	Primary active transporter	3.A.1.204.12	ATP-binding Cassette (ABC) Superfamily	ATP binding [GO:0005524]
B1N2M5	EHI_178580	ATP-binding cassette protein, putative	ATP-binding cassette protein, putative	1358	ABC transporter	PlasmaMembrane	plasma membrane	11	12	No	Anion/Electron	3	Primary active transporter	3.A.1.204.2	ATP-binding Cassette (ABC) Superfamily	ATPase activity, coupled to transmembrane movement of substances [GO:0042626]; ATP binding [GO:0005524]	transmembrane transport [GO:0055085]
C4LY93	EHI_166890	ABC transporter, putative	ABC transporter, putative	637	ABC transporter	PlasmaMembrane	plasma membrane	7	6	No	Anion/Electron	3	Primary active transporter	3.A.1.204.2	ATP-binding Cassette (ABC) Superfamily	ATPase activity, coupled to transmembrane movement of substances [GO:0042626]; ATP binding [GO:0005524]
C4LT38	EHI_148680	Uncharacterized protein	hypothetical protein, conserved	1129	FtsX-like permease family	PlasmaMembrane	golgi apparatus membrane	15	10	No	Cation	3	Primary active transporter	3.A.1.207.4	ATP-binding Cassette (ABC) Superfamily
C4LV61	EHI_182810	Uncharacterized protein	hypothetical protein	1008	FtsX-like permease family	PlasmaMembrane	golgi apparatus membrane	11	10	No	Cation	3	Primary active transporter	3.A.1.207.4	ATP-binding Cassette (ABC) Superfamily
C4M0V2	EHI_100320	Multidrug resistance protein, putative	multidrug resistance protein, putative	1600	ABC transporter transmembrane region	PlasmaMembrane	plasma membrane	16	16	No	Anion/Other	3	Primary active transporter	3.A.1.208.32	ATP-binding Cassette (ABC) Superfamily	ATPase activity, coupled to transmembrane movement of substances [GO:0042626]; ATP binding [GO:0005524]	transmembrane transport [GO:0055085]
C4M978	EHI_124840	ABC transporter, putative	ABC transporter, putative	1372	ABC transporter transmembrane region	PlasmaMembrane	mitochondrion	16	15	No	Anion	3	Primary active transporter	3.A.1.208.32	ATP-binding Cassette (ABC) Superfamily	ATPase activity, coupled to transmembrane movement of substances [GO:0042626]; ATP binding [GO:0005524]; xenobiotic transmembrane transporting ATPase activity [GO:0008559]	transmembrane transport [GO:0055085]
C4M9U4	EHI_108480	Sec1 family domain containing protein	Sec1 family protein	468	Sec1 family	PlasmaMembrane	cytoplasm	1	0	No	No hits	3	Primary active transporter	3.A.1.208.33	ATP-binding Cassette (ABC) Superfamily		vesicle docking involved in exocytosis [GO:0006904]
C4M9N1	EHI_060870	Uncharacterized protein	hypothetical protein	840	ABC transporter	PlasmaMembrane	mitochondrion membrane	7	7	No	Anion/Proteins/mRNA/Sugar	3	Primary active transporter	3.A.1.208.35	ATP-binding Cassette (ABC) Superfamily	ATPase activity, coupled to transmembrane movement of substances [GO:0042626]; ATP binding [GO:0005524]	transmembrane transport [GO:0055085]
C4M558	EHI_178050	ATP-binding cassette, putative	ATP-binding cassette protein, putative	1343	ABC transporter transmembrane region	PlasmaMembrane	plasma membrane	11	12	No	Anion/Electron/Other	3	Primary active transporter	3.A.1.208.35	ATP-binding Cassette (ABC) Superfamily	ATPase activity, coupled to transmembrane movement of substances [GO:0042626]; ATP binding [GO:0005524]	transmembrane transport [GO:0055085]
C4M3D9	EHI_095820	ATP-binding cassette, putative	ATP-binding cassette protein, putative	1337	ABC transporter transmembrane region	PlasmaMembrane	plasma membrane	11	13	No	Anion/Electron/Other	3	Primary active transporter	3.A.1.208.8	ATP-binding Cassette (ABC) Superfamily	ATPase activity, coupled to transmembrane movement of substances [GO:0042626]; ATP binding [GO:0005524]	transmembrane transport [GO:0055085]
B1N4V2	EHI_001290	p-glycoprotein-2, putative	P-glycoprotein-2, putative	322	ABC transporter transmembrane region	PlasmaMembrane	plasma membrane	3	4	No	Cation	3	Primary active transporter	3.A.1.211.11	ATP-binding Cassette (ABC) Superfamily	ATPase activity, coupled to transmembrane movement of substances [GO:0042626]; ATP binding [GO:0005524]
Q24811	EHI_197670	ABC family transporter (ABC transporter, putative)	ABC transporter, putative	808	ABC transporter	PlasmaMembrane	endoplasmic reticulum membrane	6	6	No	Other	3	Primary active transporter	3.A.1.211.12	ATP-binding Cassette (ABC) Superfamily	ATPase activity, coupled to transmembrane movement of substances [GO:0042626]; ATP binding [GO:0005524]	lipid transport [GO:0006869]
C4M007	EHI_134470	ATP-binding cassette protein, putative	ATP-binding cassette protein, putative	1314	ABC transporter transmembrane region	PlasmaMembrane	chloroplast	11	0	No	Anion/Cation/Sugar/Other	3	Primary active transporter	3.A.1.211.32	ATP-binding Cassette (ABC) Superfamily	ATPase activity, coupled to transmembrane movement of substances [GO:0042626]; ATP binding [GO:0005524]	transmembrane transport [GO:0055085]
C4M7I3	EHI_112010	ABC transporter, putative	ABC transporter, putative	917	ABC transporter	PlasmaMembrane	chloroplast	7	7	No	Anion/Electron/Other	3	Primary active transporter	3.A.1.211.7	ATP-binding Cassette (ABC) Superfamily	ATPase activity, coupled to transmembrane movement of substances [GO:0042626]; ATP binding [GO:0005524]	lipid transport [GO:0006869]; protein-chromophore linkage [GO:0018298]
C4M7Y6	EHI_119560	Derlin	hypothetical protein, conserved	198	Der1-like family	PlasmaMembrane	endoplasmic reticulum membrane	4	6	No	No hits	3	Primary active transporter	3.A.16.1.1	Endoplasmic Reticular Retrotranslocon (ER-RT) Family
C4LUH3	EHI_049740	Ubiquitin-conjugating	ubiquitin-conjugating enzyme family protein	344	Ubiquitin-conjugating enzyme	Nuclear	endoplasmic reticulum membrane	1	1	No	No hits	3	Primary active transporter	3.A.16.1.2	Endoplasmic Reticular Retrotranslocon (ER-RT) Family
C4LW85	EHI_155320	Zinc finger domain containing protein	zinc finger domain containing protein	442	Ring finger	PlasmaMembrane	nucleus	6	7	No	No hits	3	Primary active transporter	3.A.16.1.3	Endoplasmic Reticular Retrotranslocon (ER-RT) Family	ubiquitin protein ligase activity [GO:0061630]	proteasome-mediated ubiquitin-dependent protein catabolic process [GO:0043161]; protein polyubiquitination [GO:0000209]; protein ubiquitination involved in ubiquitin-dependent protein catabolic process [GO:0042787]
B1N3U9	EHI_110940	Zinc finger domain containing protein	zinc finger domain containing protein	195	Ring finger domain	PlasmaMembrane	plasma membrane	2	2	No	No hits	3	Primary active transporter	3.A.16.1.3	Endoplasmic Reticular Retrotranslocon (ER-RT) Family	ubiquitin protein ligase activity [GO:0061630]	proteasome-mediated ubiquitin-dependent protein catabolic process [GO:0043161]
C4LSN5	EHI_151960	Zinc finger domain containing protein	zinc finger domain containing protein	446	Ring finger domain	PlasmaMembrane	endoplasmic reticulum membrane	6	7	No	No hits	3	Primary active transporter	3.A.16.1.3	Endoplasmic Reticular Retrotranslocon (ER-RT) Family
C4LXE3	EHI_130650	Zinc finger domain containing protein	zinc finger domain containing protein	319	Ring finger domain	PlasmaMembrane	nucleus	5	4	No	No hits	3	Primary active transporter	3.A.16.1.3	Endoplasmic Reticular Retrotranslocon (ER-RT) Family
C4LXJ9	EHI_073340	Zinc finger domain containing protein	zinc finger domain containing protein	382	Ring finger domain	PlasmaMembrane	nucleus	5	5	No	No hits	3	Primary active transporter	3.A.16.1.3	Endoplasmic Reticular Retrotranslocon (ER-RT) Family
C4M1S1	EHI_164390	Zinc finger domain containing protein	zinc finger domain containing protein	219	Ring finger domain	PlasmaMembrane	plasma membrane	3	3	No	No hits	3	Primary active transporter	3.A.16.1.3	Endoplasmic Reticular Retrotranslocon (ER-RT) Family	ubiquitin protein ligase activity [GO:0061630]	proteasome-mediated ubiquitin-dependent protein catabolic process [GO:0043161]
C4M1T9	EHI_027510	Zinc finger domain containing protein	zinc finger domain containing protein	391	Ring finger domain	PlasmaMembrane	plasma membrane	4	4	Yes	No hits	3	Primary active transporter	3.A.16.1.3	Endoplasmic Reticular Retrotranslocon (ER-RT) Family
C4M7F0	EHI_166440	Zinc finger domain containing protein	zinc finger domain containing protein	310	Ring finger domain	PlasmaMembrane	plasma membrane	6	6	No	No hits	3	Primary active transporter	3.A.16.1.3	Endoplasmic Reticular Retrotranslocon (ER-RT) Family	ubiquitin protein ligase activity involved in ERAD pathway [GO:1904264]; ubiquitin-specific protease binding [GO:1990381]	endoplasmic reticulum unfolded protein response [GO:0030968]; protein polyubiquitination [GO:0000209]; protein ubiquitination involved in ubiquitin-dependent protein catabolic process [GO:0042787]
C4LXY8	EHI_035580	Derlin	Der1 family protein, putative	254	Der1-like family	PlasmaMembrane	endoplasmic reticulum membrane	5	6	No	Anion	3	Primary active transporter	3.A.16.1.3	Endoplasmic Reticular Retrotranslocon (ER-RT) Family
C4M9I6	EHI_187760	Uncharacterized	hypothetical protein, conserved	241	Sel1 repeat	Cytoplasmic	endoplasmic reticulum membrane	1	0	No	No hits	3	Primary active transporter	3.A.16.1.3	Endoplasmic Reticular Retrotranslocon (ER-RT) Family
C4M5G0	EHI_058540	Zinc	zinc finger domain containing protein	260	Ring finger domain	Extracellular	golgi apparatus membrane	1	1	No	Cation/Electron/Proteins/mRNA	3	Primary active transporter	3.A.16.1.3	Endoplasmic Reticular Retrotranslocon (ER-RT) Family
C4M8G3	EHI_036640	Zinc	zinc finger domain containing protein	260	Ring finger domain	Extracellular	golgi apparatus membrane	1	1	No	Cation/Electron/Proteins/mRNA	3	Primary active transporter	3.A.16.1.3	Endoplasmic Reticular Retrotranslocon (ER-RT) Family
C4LZN3	EHI_175080	Guanylate binding protein, putative	guanylate binding protein, putative	541	Guanylate-binding protein, N-terminal domain	PlasmaMembrane	endoplasmic reticulum membrane	3	3	Yes	No hits	3	Primary active transporter	1.N.5.1.5	Endoplasmic Reticulum (ER) Fusion GTPase, Atlastin (Atlastin) Family	GTPase activity [GO:0003924]; GTP binding [GO:0005525]
C4M2Z1	EHI_074020	V-type proton ATPase subunit a	vacuolar proton ATPase subunit, putative	803	V-type ATPase 116kDa subunit family	PlasmaMembrane	plasma membrane	6	7	No	Anion/Cation	3	Primary active transporter	3.A.2.2.4	H+- or Na+-translocating F-type, V-type and A-type ATPase (F-ATPase) Superfamily	ATPase binding [GO:0051117]; proton-transporting ATPase activity, rotational mechanism [GO:0046961]	ATP hydrolysis coupled proton transport [GO:0015991]; ATP synthesis coupled proton transport [GO:0015986]; vacuolar acidification [GO:0007035]; vacuolar proton-transporting V-type ATPase complex assembly [GO:0070072]
C4LUX4	EHI_092090	Uncharacterized protein	hypothetical protein, conserved	799	EXS family	PlasmaMembrane	plasma membrane	7	8	No	Anion	3	Primary active transporter	3.A.2.2.4	H+- or Na+-translocating F-type, V-type and A-type ATPase (F-ATPase) Superfamily
C4M169	EHI_107280	V-type proton ATPase subunit a	vacuolar proton ATPase subunit, putative	871	V-type ATPase 116kDa subunit family	PlasmaMembrane	vacuole membrane	6	7	No	Anion/Cation	3	Primary active transporter	3.A.2.2.6	H+- or Na+-translocating F-type, V-type and A-type ATPase (F-ATPase) Superfamily	ATPase binding [GO:0051117]; proton-transporting ATPase activity, rotational mechanism [GO:0046961]	ATP hydrolysis coupled proton transport [GO:0015991]; ATP synthesis coupled proton transport [GO:0015986]; vacuolar acidification [GO:0007035]; vacuolar proton-transporting V-type ATPase complex assembly [GO:0070072]
C4M343	EHI_059840	V-type proton ATPase proteolipid subunit	V-type ATPase, C subunit, putative	177	ATP synthase subunit C	PlasmaMembrane	vacuole membrane	4	4	No	Cation	3	Primary active transporter	3.A.2.2.7	H+- or Na+-translocating F-type, V-type and A-type ATPase (F-ATPase) Superfamily	proton-transporting ATPase activity, rotational mechanism [GO:0046961]	asexual reproduction [GO:0019954]; ATP hydrolysis coupled proton transport [GO:0015991]; calcium ion transport [GO:0006816]; vacuolar acidification [GO:0007035]
C4MAX4	EHI_029370	Vacuolar ATP synthase proteolipid subunit, putative	Vacuolar ATP synthase proteolipid subunit, putative	173	ATP synthase subunit C	PlasmaMembrane	vacuole membrane	4	4	No	Amino Acid/Cation	3	Primary active transporter	3.A.2.2.7	H+- or Na+-translocating F-type, V-type and A-type ATPase (F-ATPase) Superfamily	proton-transporting ATPase activity, rotational mechanism [GO:0046961]	ATP hydrolysis coupled proton transport [GO:0015991]; vacuolar acidification [GO:0007035]
C4MBH5	EHI_073180	Zinc	zinc finger domain containing protein	102	Ring finger domain	Extracellular	endoplasmic reticulum membrane	1	1	No	No hits	3	Primary active transporter	3.A.20.1.1	Peroxisomal Protein Importer (PPI) Family
C4M901	EHI_038330	Zinc finger domain containing protein	zinc finger domain containing protein	217	Ring finger domain	PlasmaMembrane	endoplasmic reticulum membrane	2	1	No	No hits	3	Primary active transporter	3.A.20.1.3	Peroxisomal Protein Importer (PPI) Family	ubiquitin-like protein conjugating enzyme binding [GO:0044390]; ubiquitin protein ligase activity involved in ERAD pathway [GO:1904264]	ER-associated misfolded protein catabolic process [GO:0071712]; protein ubiquitination involved in ubiquitin-dependent protein catabolic process [GO:0042787]
C4M5X7	EHI_137030	Zinc finger domain containing protein	zinc finger domain containing protein	141	zinc-RING finger domain	PlasmaMembrane	nucleus	1	1	No	No hits	3	Primary active transporter	3.A.20.1.3	Peroxisomal Protein Importer (PPI) Family
C4M3Y2	EHI_200770	Short chain dehydrogenase family protein	3-ketodihydrosphingosine reductase protein, putative	337	short chain dehydrogenase	PlasmaMembrane	chloroplast	2	5	No	Electron	3	Primary active transporter	3.A.25.2.1	Symbiont-specific ERAD-like Machinery (SELMA) Family	2,3-dihydro-2,3-dihydroxybenzoate dehydrogenase activity [GO:0008667]	siderophore biosynthetic process [GO:0019290]
C4LSX6	EHI_148060	ER membrane protein complex subunit 3	hypothetical protein, conserved	273	Integral membrane protein DUF106	PlasmaMembrane	endoplasmic reticulum membrane	3	3	No	Anion/Other	3	Primary active transporter	3.A.27.1.1	Endoplasmic Reticulum Membrane Protein Insertion Complex (EMC) Family		protein folding in endoplasmic reticulum [GO:0034975]
C4MBJ2	EHI_063570	Uncharacterized protein	hypothetical protein, conserved	135	Protein of unknown function (DUF1077)	PlasmaMembrane	endoplasmic reticulum membrane	4	2	No	Anion/Sugar	3	Primary active transporter	3.A.27.1.1	Endoplasmic Reticulum Membrane Protein Insertion Complex (EMC) Family		protein folding in endoplasmic reticulum [GO:0034975]
C4LZY3	EHI_065670	Cation-transporting ATPase (EC 3.6.3.-)	cation-transporting P-typeATPase, putative	1118	E1-E2 ATPase	PlasmaMembrane	endoplasmic reticulum membrane	9	12	No	Anion/Electron	3	Primary active transporter	3.A.3.10.2	P-type ATPase (P-ATPase) Superfamily	ATP binding [GO:0005524]; calcium-transporting ATPase activity [GO:0005388]; metal ion binding [GO:0046872]	cellular calcium ion homeostasis [GO:0006874]
C4M1F1	EHI_030830	Calcium-transporting ATPase (EC 3.6.3.8)	Plasma membrane calcium-transporting ATPase, putative	1026	haloacid dehalogenase-like hydrolase	PlasmaMembrane	plasma membrane	8	10	No	Anion/Proteins/mRNA/Sugar	3	Primary active transporter	3.A.3.2.1	P-type ATPase (P-ATPase) Superfamily	ATP binding [GO:0005524]; calcium-transporting ATPase activity [GO:0005388]
C4M3X0	EHI_016480	Calcium-transporting ATPase (EC 3.6.3.8)	Plasma membrane calcium-transporting ATPase, putative	1072	haloacid dehalogenase-like hydrolase	PlasmaMembrane	plasma membrane	8	10	No	Anion/Proteins/mRNA/Sugar	3	Primary active transporter	3.A.3.2.1	P-type ATPase (P-ATPase) Superfamily	ATP binding [GO:0005524]; calcium-transporting ATPase activity [GO:0005388]
C4M2K1	EHI_054830	Calcium-transporting ATPase (EC 3.6.3.8)	Plasma membrane calcium-transporting ATPase, putative	1087	haloacid dehalogenase-like hydrolase	PlasmaMembrane	plasma membrane	8	10	No	Anion/Proteins/mRNA/Sugar	3	Primary active transporter	3.A.3.2.14	P-type ATPase (P-ATPase) Superfamily	ATP binding [GO:0005524]; calcium-transporting ATPase activity [GO:0005388]
C4MAZ0	EHI_136610	Plasma membrane calcium ion-transporting ATPase, putative	plasma membrane calcium ion-transporting ATPase, putative	627	Putative hydrolase of sodium-potassium ATPase alpha subunit	PlasmaMembrane	plasma membrane	5	4	No	Sugar	3	Primary active transporter	3.A.3.2.14	P-type ATPase (P-ATPase) Superfamily	ATP binding [GO:0005524]; calcium-transporting ATPase activity [GO:0005388]
C4M1V7	EHI_027710	Calcium-transporting P-type ATPase, putative	calcium-transporting P-type ATPase, putative	1137	haloacid dehalogenase-like hydrolase	PlasmaMembrane	endoplasmic reticulum membrane	10	10	No	Anion/Electron	3	Primary active transporter	3.A.3.2.21	P-type ATPase (P-ATPase) Superfamily	ATP binding [GO:0005524]; hydrolase activity [GO:0016787]
B1N3C2	EHI_001150	Plasma membrane calcium-transporting ATPase 1, putative	plasma membrane calcium-transporting ATPase 1, putative	685	haloacid dehalogenase-like hydrolase	PlasmaMembrane	plasma membrane	5	6	No	Proteins/mRNA	3	Primary active transporter	3.A.3.2.25	P-type ATPase (P-ATPase) Superfamily	calcium-transporting ATPase activity [GO:0005388]; nucleotide binding [GO:0000166]
C4LSX2	EHI_148020	Golgi apparatus membrane protein TVP23 homolog	hypothetical protein, conserved	203	Eukaryotic protein of unknown function (DUF846)	PlasmaMembrane	golgi apparatus membrane	4	4	No	Cation/Sugar/Other	3	Primary active transporter	3.A.3.5.10	P-type ATPase (P-ATPase) Superfamily		protein secretion [GO:0009306]; vesicle-mediated transport [GO:0016192]
C4M108	EHI_135220	Phospholipid-transporting P-type ATPase, putative	phospholipid-transporting P-type ATPase, putative	982	haloacid dehalogenase-like hydrolase	PlasmaMembrane	golgi apparatus membrane	10	10	No	Anion/Cation/Other	3	Primary active transporter	3.A.3.8.1	P-type ATPase (P-ATPase) Superfamily	ATP binding [GO:0005524]; magnesium ion binding [GO:0000287]; phospholipid-translocating ATPase activity [GO:0004012]	Golgi vesicle budding [GO:0048194]
C4LZ23	EHI_009460	Phospholipid-transporting ATPase (EC 3.6.3.1)	phospholipid-transporting P-type ATPase, putative	1099	haloacid dehalogenase-like hydrolase	PlasmaMembrane	golgi apparatus membrane	6	12	No	Anion/Proteins/mRNA	3	Primary active transporter	3.A.3.8.10	P-type ATPase (P-ATPase) Superfamily	ATP binding [GO:0005524]; magnesium ion binding [GO:0000287]; phospholipid-translocating ATPase activity [GO:0004012]	Golgi vesicle budding [GO:0048194]
C4M462	EHI_140130	Phospholipid-transporting ATPase (EC 3.6.3.1)	phospholipid-transporting P-type ATPase, putative	1335	haloacid dehalogenase-like hydrolase	PlasmaMembrane	golgi apparatus membrane	10	10	No	Anion/Electron/Sugar	3	Primary active transporter	3.A.3.8.10	P-type ATPase (P-ATPase) Superfamily	ATP binding [GO:0005524]; magnesium ion binding [GO:0000287]; phospholipid-translocating ATPase activity [GO:0004012]	Golgi vesicle budding [GO:0048194]
C4MA58	EHI_024120	Phospholipid-transporting ATPase (EC 3.6.3.1)	phospholipid-transporting P-type ATPase, putative	1055	haloacid dehalogenase-like hydrolase	PlasmaMembrane	plasma membrane	10	10	No	Anion/Cation/Sugar	3	Primary active transporter	3.A.3.8.12	P-type ATPase (P-ATPase) Superfamily	ATP binding [GO:0005524]; magnesium ion binding [GO:0000287]; phospholipid-translocating ATPase activity [GO:0004012]	Golgi vesicle budding [GO:0048194]
B1N2P9	EHI_197300	Phospholipid-transporting ATPase (EC 3.6.3.1)	phospholipid-transporting ATPase Neo1, putative	1063	haloacid dehalogenase-like hydrolase	PlasmaMembrane	golgi apparatus membrane	8	10	No	Anion/Cation/Electron	3	Primary active transporter	3.A.3.8.16	P-type ATPase (P-ATPase) Superfamily	ATP binding [GO:0005524]; magnesium ion binding [GO:0000287]; phospholipid-translocating ATPase activity [GO:0004012]	endocytosis [GO:0006897]; retrograde vesicle-mediated transport, Golgi to ER [GO:0006890]
C4LUG5	EHI_049640	Phospholipid-transporting ATPase (EC 3.6.3.1)	phospholipid-transporting P-type ATPase, putative	1068	haloacid dehalogenase-like hydrolase	PlasmaMembrane	golgi apparatus membrane	10	10	No	Anion/Electron	3	Primary active transporter	3.A.3.8.16	P-type ATPase (P-ATPase) Superfamily	ATP binding [GO:0005524]; magnesium ion binding [GO:0000287]; phospholipid-translocating ATPase activity [GO:0004012]	endocytosis [GO:0006897]; retrograde vesicle-mediated transport, Golgi to ER [GO:0006890]
Q9Y088	EHI_168260	Phospholipid-transporting ATPase (EC 3.6.3.1)	phospholipid-transporting P-type ATPase, putative	1057	haloacid dehalogenase-like hydrolase	PlasmaMembrane	golgi apparatus membrane	10	0	No	Anion	3	Primary active transporter	3.A.3.8.16	P-type ATPase (P-ATPase) Superfamily	ATP binding [GO:0005524]; magnesium ion binding [GO:0000287]; phospholipid-translocating ATPase activity [GO:0004012]	endocytosis [GO:0006897]; retrograde vesicle-mediated transport, Golgi to ER [GO:0006890]
B1N3G4	EHI_174280	Phospholipid-transporting ATPase (EC 3.6.3.1)	phospholipid-translocating P-type ATPase, putative	1001	ATPase-Plipid: phospholipid-translocating P-type ATPase, flippase	PlasmaMembrane	golgi apparatus membrane	8	8	No	Anion	3	Primary active transporter	3.A.3.8.6	P-type ATPase (P-ATPase) Superfamily	ATP binding [GO:0005524]; magnesium ion binding [GO:0000287]; phospholipid-translocating ATPase activity [GO:0004012]	Golgi vesicle budding [GO:0048194]
C4LWH4	EHI_096620	Phospholipid-transporting ATPase (EC 3.6.3.1)	phospholipid-transporting P-type ATPase, putative	1166	haloacid dehalogenase-like hydrolase	PlasmaMembrane	golgi apparatus membrane	10	10	No	Anion/Cation	3	Primary active transporter	3.A.3.8.6	P-type ATPase (P-ATPase) Superfamily	ATP binding [GO:0005524]; magnesium ion binding [GO:0000287]; phospholipid-translocating ATPase activity [GO:0004012]	Golgi vesicle budding [GO:0048194]
C4LW20	EHI_141350	Phospholipid-transporting ATPase (EC 3.6.3.1)	phospholipid-transporting ATPase IA, putative	1098	haloacid dehalogenase-like hydrolase	PlasmaMembrane	golgi apparatus membrane	10	10	No	Anion	3	Primary active transporter	3.A.3.8.8	P-type ATPase (P-ATPase) Superfamily	ATP binding [GO:0005524]; magnesium ion binding [GO:0000287]; phospholipid-translocating ATPase activity [GO:0004012]	Golgi vesicle budding [GO:0048194]
C4M195	EHI_188210	Phospholipid-transporting ATPase (EC 3.6.3.1)	phospholipid-transporting P-type ATPase, putative	1050	haloacid dehalogenase-like hydrolase	PlasmaMembrane	golgi apparatus membrane	7	9	No	No hits	3	Primary active transporter	3.A.3.8.8	P-type ATPase (P-ATPase) Superfamily	ATP binding [GO:0005524]; magnesium ion binding [GO:0000287]; phospholipid-translocating ATPase activity [GO:0004012]	Golgi vesicle budding [GO:0048194]
B1N2N5	EHI_092570	Uncharacterized protein	hypothetical protein	236	Signal recognition particle receptor beta subunit	PlasmaMembrane	cytoplasm	1	1	No	Electron/Proteins/mRNA	3	Primary active transporter	3.A.5.8.1	General Secretory Pathway (Sec) Family	GTP binding [GO:0005525]; signal recognition particle binding [GO:0005047]
B1N345	EHI_000670	Uncharacterized protein	hypothetical protein	236	Signal recognition particle receptor beta subunit	PlasmaMembrane	cytoplasm	1	1	No	Electron/Proteins/mRNA	3	Primary active transporter	3.A.5.8.1	General Secretory Pathway (Sec) Family	GTP binding [GO:0005525]; signal recognition particle binding [GO:0005047]
C4LUZ7	EHI_092340	Sec61 protein, putative	Sec61 protein, putative	81	Plug domain of Sec61p	PlasmaMembrane	endoplasmic reticulum membrane	1	1	No	Anion	3	Primary active transporter	3.A.5.9.1	General Secretory Pathway (Sec) Family		protein transport [GO:0015031]
C4LZS0	EHI_038990	Protein transport protein SEC61 gamma subunit, putative	Protein transport protein SEC61 gamma subunit, putative	70	SecE/Sec61-gamma subunits of protein translocation complex	PlasmaMembrane	endoplasmic reticulum membrane	1	1	No	Anion	3	Primary active transporter	3.A.5.9.1	General Secretory Pathway (Sec) Family	P-P-bond-hydrolysis-driven protein transmembrane transporter activity [GO:0015450]	protein targeting [GO:0006605]
C4M1T1	EHI_164500	Sec61 alpha subunit, putative	Sec61 alpha subunit, putative	344	SecY translocase	PlasmaMembrane	endoplasmic reticulum membrane	4	8	No	Cation/Sugar	3	Primary active transporter	3.A.5.9.1	General Secretory Pathway (Sec) Family		protein transport [GO:0015031]
C4M417	EHI_195140	Uncharacterized protein	hypothetical protein	152	B-cell receptor-associated protein 31-like	PlasmaMembrane	endoplasmic reticulum membrane	3	3	No	Anion/Cation	3	Primary active transporter	3.A.5.9.1	General Secretory Pathway (Sec) Family		ER to Golgi vesicle-mediated transport [GO:0006888]; intracellular protein transport [GO:0006886]; protein localization to endoplasmic reticulum exit site [GO:0070973]
C4M4A8	EHI_048170	Protein	Protein transport protein SEC61 gamma subunit, putative	69	SecE/Sec61-gamma subunits of protein translocation complex	Nuclear	endoplasmic reticulum membrane	1	1	No	No hits	3	Primary active transporter	3.A.5.9.1	General Secretory Pathway (Sec) Family
Q1EPZ3	EHI_086200	EhSyntaxin	hypothetical protein	109	SNARE domain	Cytoplasmic	golgi apparatus membrane	1	1	No	Cation/Proteins/MRNA/Sugar	3	Primary active transporter	8.A.91.1.0	Syntaxin (Syntaxin) Family
C4M5M0	EHI_122890	Uncharacterized protein	hypothetical protein	612	Intramolecular chaperone auto-processing domain	PlasmaMembrane	golgi apparatus membrane	5	5	No	No hits	3	Primary active transporter	3.A.7.12.1	Type IV (Conjugal DNA-Protein Transfer or VirB) Secretory Pathway (IVSP) Family
C4MBM7	EHI_115160	AIG1 family protein	AIG1	309	AIG1 family	Chloroplast	mitochondrion membrane	1	1	No	No hits	3	Primary active transporter	3.A.9.1.1	Chloroplast Envelope Protein Translocase (CEPT or Tic-Toc) Family
C4M4X3	EHI_119040	AIG1 family protein	AIG1 family protein, putative	308	AIG1 family	Cytoplasmic	mitochondrion membrane	1	1	No	No hits	3	Primary active transporter	3.A.9.1.1	Chloroplast Envelope Protein Translocase (CEPT or Tic-Toc) Family
C4LXL4	EHI_073540	Heat shock protein 101, putative	heat shock protein 101, putative	166	AAA ATPase domain	PlasmaMembrane	mitochondrion	1	1	No	Anion/Proteins/mRNA	3	Primary active transporter	3.A.9.1.2	Chloroplast Envelope Protein Translocase (CEPT or Tic-Toc) Family		protein metabolic process [GO:0019538]
C4M5K7	EHI_001930	Pyridine nucleotide transhydrogenase beta subunit, putative	pyridine nucleotide transhydrogenase beta subunit, putative	462	NAD(P) transhydrogenase beta subunit	PlasmaMembrane	plasma membrane	9	9	No	Anion/Cation	3	Primary active transporter	3.D.2.1.1	Proton-translocating Transhydrogenase (PTH) Family	NAD(P)+ transhydrogenase (AB-specific) activity [GO:0008750]; NAD binding [GO:0051287]; NADP binding [GO:0050661]	NADPH regeneration [GO:0006740]; proton transport [GO:0015992]
B1N4I3	EHI_055400	Uncharacterized protein	NAD(P)( ) transhydrogenase (AB-specific), alpha subunit, putative	1098	Alanine dehydrogenase/PNT, C-terminal domain	PlasmaMembrane	plasma membrane	13	13	No	Amino Acid/Anion	3	Primary active transporter	3.D.2.4.1	Proton-translocating Transhydrogenase (PTH) Family	NAD(P)+ transhydrogenase (AB-specific) activity [GO:0008750]; NAD binding [GO:0051287]; NADP binding [GO:0050661]	NADPH regeneration [GO:0006740]; proton transport [GO:0015992]
Q24858	EHI_014030	NAD(P) transhydrogenase subunit alpha, putative (Pyridine nucleotidetranshydrogenase)	NAD(P) transhydrogenase subunit alpha, putative	1083	NAD(P) transhydrogenase beta subunit	PlasmaMembrane	plasma membrane	13	13	No	Amino Acid	3	Primary active transporter	3.D.2.4.1	Proton-translocating Transhydrogenase (PTH) Family	NAD(P)+ transhydrogenase (AB-specific) activity [GO:0008750]; NAD binding [GO:0051287]; NADP binding [GO:0050661]	NADPH regeneration [GO:0006740]; proton transport [GO:0015992]
C4M658	EHI_042900	Thioredoxin, putative	thioredoxin, putative	144	Thioredoxin	PlasmaMembrane	chloroplast	1	1	No	Anion/Electron	3	Primary active transporter	3.D.3.5.2	Proton-translocating Quinol:Cytochrome c Reductase (QCR) Superfamily	oxidoreductase activity, acting on a sulfur group of donors, disulfide as acceptor [GO:0016671]; protein disulfide oxidoreductase activity [GO:0015035]; protein-disulfide reductase activity [GO:0047134]; thioredoxin-disulfide reductase activity [GO:0004791]	cell redox homeostasis [GO:0045454]; cellular response to oxidative stress [GO:0034599]; glycerol ether metabolic process [GO:0006662]
C4LTA3	EHI_044840	Chitin synthase 2, putative	chitin synthase 2, putative	946	Chitin synthase	PlasmaMembrane	plasma membrane	16	16	No	No hits	4	Group Transporters	4.D.1.1.12	Putative Vectorial Glycosyl Polymerization (VGP) Family	chitin synthase activity [GO:0004100]	cell wall chitin biosynthetic process [GO:0006038]
C4M7L0	EHI_170480	Chitin sythase, putative	chitin sythase, putative	642	Chitin synthase	PlasmaMembrane	plasma membrane	7	7	No	Anion/Cation/Sugar	4	Group Transporters	4.D.1.1.12	Putative Vectorial Glycosyl Polymerization (VGP) Family	chitin synthase activity [GO:0004100]	cell wall chitin biosynthetic process [GO:0006038]
C4M6U0	EHI_054260	Dolichol monophosphate mannose synthase, putative	dolichol monophosphate mannose synthase, putative	353	Glycosyl transferase family 2	PlasmaMembrane	endoplasmic reticulum membrane	4	4	No	Amino Acid/Anion	4	Group Transporters	4.D.2.1.13	Glycosyl Transferase 2 (GT2) Family		polysaccharide biosynthetic process [GO:0000271]
C4M6C8	EHI_099290	Aminoalcoholphosphotransferase, putative	aminoalcoholphosphotransferase, putative	349	CDP-alcohol phosphatidyltransferase	PlasmaMembrane	golgi apparatus membrane	10	10	No	No hits	4	Group Transporters	4.F.1.1.1	Choline/EthanolaminePhosphotransferase 1 (CEPT1) Family	phosphotransferase activity, for other substituted phosphate groups [GO:0016780]	phospholipid biosynthetic process [GO:0008654]
C4M9P0	EHI_080720	Aminoalcoholphosphotransferase, putative	aminoalcoholphosphotransferase, putative	377	CDP-alcohol phosphatidyltransferase	PlasmaMembrane	golgi apparatus membrane	8	8	No	No hits	4	Group Transporters	4.F.1.1.1	Choline/EthanolaminePhosphotransferase 1 (CEPT1) Family	phosphotransferase activity, for other substituted phosphate groups [GO:0016780]	phospholipid biosynthetic process [GO:0008654]
C4MBH3	EHI_182040	CDP-alcohol phosphatidyltransferase family protein	CDP-alcohol phosphatidyltransferase family protein	383	CDP-alcohol phosphatidyltransferase	PlasmaMembrane	golgi apparatus membrane	10	10	No	Anion/Sugar	4	Group Transporters	4.F.1.1.1	Choline/EthanolaminePhosphotransferase 1 (CEPT1) Family	phosphotransferase activity, for other substituted phosphate groups [GO:0016780]	phospholipid biosynthetic process [GO:0008654]
B1N5L7	EHI_055140	Ethanolamine phosphotransferase, putative (Fragment)	ethanolamine phosphotransferase, putative	136	CDP-alcohol phosphatidyltransferase	PlasmaMembrane	golgi apparatus membrane	2	2	No	No hits	4	Group Transporters	4.F.1.1.2	Choline/EthanolaminePhosphotransferase 1 (CEPT1) Family	phosphotransferase activity, for other substituted phosphate groups [GO:0016780]	phospholipid biosynthetic process [GO:0008654]
C4LTG8	EHI_045570	CDP-alcohol phosphatidyltransferase family protein	CDP-alcohol phosphatidyltransferase family protein	372	CDP-alcohol phosphatidyltransferase	PlasmaMembrane	golgi apparatus membrane	9	10	No	No hits	4	Group Transporters	4.F.1.1.2	Choline/EthanolaminePhosphotransferase 1 (CEPT1) Family	phosphotransferase activity, for other substituted phosphate groups [GO:0016780]	phospholipid biosynthetic process [GO:0008654]
C4LTY8	EHI_067920	CDP-alcohol phosphatidyltransferase family protein	CDP-alcohol phosphatidyltransferase family protein	371	CDP-alcohol phosphatidyltransferase	PlasmaMembrane	golgi apparatus membrane	9	10	No	Anion/Sugar	4	Group Transporters	4.F.1.1.2	Choline/EthanolaminePhosphotransferase 1 (CEPT1) Family	phosphotransferase activity, for other substituted phosphate groups [GO:0016780]	phospholipid biosynthetic process [GO:0008654]
C4M2J1	EHI_054720	CDP-alcohol phosphatidyltransferase family protein	CDP-alcohol phosphatidyltransferase family protein	385	CDP-alcohol phosphatidyltransferase	PlasmaMembrane	golgi apparatus membrane	9	10	No	No hits	4	Group Transporters	4.F.1.1.2	Choline/EthanolaminePhosphotransferase 1 (CEPT1) Family	phosphotransferase activity, for other substituted phosphate groups [GO:0016780]	phospholipid biosynthetic process [GO:0008654]
B1N5V9	EHI_105970	Diacylglycerol cholinephosphotransferase, putative	diacylglycerol cholinephosphotransferase, putative	130	CDP-alcohol phosphatidyltransferase	PlasmaMembrane	golgi apparatus membrane	2	2	No	No hits	4	Group Transporters	4.F.1.1.3	Choline/EthanolaminePhosphotransferase 1 (CEPT1) Family	phosphotransferase activity, for other substituted phosphate groups [GO:0016780]	phospholipid biosynthetic process [GO:0008654]
C4LWQ0	EHI_069630	CDP-diacylglycerol--inositol 3-phosphatidyltransferase (EC 2.7.8.11)	CDP-diacylglycerol--inositol3-phosphatidyltransferase, putative	214	CDP-alcohol phosphatidyltransferase	PlasmaMembrane	golgi apparatus membrane	4	5	No	No hits	4	Group Transporters	4.F.1.3.3	Choline/EthanolaminePhosphotransferase 1 (CEPT1) Family	CDP-diacylglycerol-inositol 3-phosphatidyltransferase activity [GO:0003881]	phosphatidylinositol biosynthetic process [GO:0006661]
C4M390	EHI_106250	Uncharacterized protein	hypothetical protein	438	Lung seven transmembrane receptor	PlasmaMembrane	endoplasmic reticulum membrane	7	7	Yes	No hits	5	Transmembrane electron carriers	5.B.1.1.6	gp91phox Phagocyte NADPH Oxidase-associated Cytochrome b558 (Phox) Family
C4M1C2	EHI_170000	Uncharacterized protein	hypothetical protein	533	Ferric reductase like transmembrane component	PlasmaMembrane	plasma membrane	5	7	No	No hits	5	Transmembrane electron carriers	5.B.1.4.4	gp91phox Phagocyte NADPH Oxidase-associated Cytochrome b558 (Phox) Family
C4M5D2	EHI_121860	Microsomal signal peptidase subunit, putative	microsomal signal peptidase subunit, putative	168	Signal peptidase subunit	Extracellular	endoplasmic reticulum membrane	1	1	No	No hits	8	Accessory factors involved in transport	8.A.1.4.1	Membrane Fusion Protein (MFP) Family
C4LSW2	EHI_152790	Membrane-bound O-acyltransferase (MBOAT ) family protein	membrane-bound O-acyltransferase (MBOAT ) family protein	473	MBOAT, membrane-bound O-acyltransferase family	PlasmaMembrane	endoplasmic reticulum membrane	8	11	No	No hits	8	Accessory factors involved in transport	8.A.100.1.1	Protein-Serine O-Palmitoleoyltransferase Porcupine (PS-PP) Family	transferase activity, transferring acyl groups [GO:0016746]
C4LVJ0	EHI_103460	Membrane-bound O-acyltransferase (MBOAT ) family protein	membrane-bound O-acyltransferase (MBOAT ) family protein	473	MBOAT, membrane-bound O-acyltransferase family	PlasmaMembrane	endoplasmic reticulum membrane	10	9	No	No hits	8	Accessory factors involved in transport	8.A.100.1.1	Protein-Serine O-Palmitoleoyltransferase Porcupine (PS-PP) Family	transferase activity, transferring acyl groups [GO:0016746]
C4M373	EHI_086180	Membrane-bound O-acyltransferase (MBOAT ) family protein	membrane-bound O-acyltransferase (MBOAT ) family protein	487	MBOAT, membrane-bound O-acyltransferase family	PlasmaMembrane	endoplasmic reticulum membrane	10	11	No	No hits	8	Accessory factors involved in transport	8.A.100.1.1	Protein-Serine O-Palmitoleoyltransferase Porcupine (PS-PP) Family	transferase activity, transferring acyl groups [GO:0016746]
C4MAP0	EHI_162540	Vacuolar protein sorting 26	vacuolar protein sorting 26	471	MBOAT, membrane-bound O-acyltransferase family	PlasmaMembrane	endoplasmic reticulum membrane	7	9	No	No hits	8	Accessory factors involved in transport	8.A.100.1.1	Protein-Serine O-Palmitoleoyltransferase Porcupine (PS-PP) Family
B1N342	EHI_104720	Uncharacterized protein	hypothetical protein	493	Protein kinase domain	PlasmaMembrane	cytoplasm	1	1	No	No hits	8	Accessory factors involved in transport	8.A.104.1.1	5'-AMP-activated protein kinase (AMPK) Family	ATP binding [GO:0005524]; protein serine/threonine kinase activity [GO:0004674]; signal transducer activity [GO:0004871]	intracellular signal transduction [GO:0035556]
C4LUZ1	EHI_092260	Tyrosine kinase, putative	tyrosine kinase, putative	733	Protein kinase domain	PlasmaMembrane	plasma membrane	1	1	No	No hits	8	Accessory factors involved in transport	8.A.23.1.12	Basigin (Basigin) Family	ATP binding [GO:0005524]; protein serine/threonine kinase activity [GO:0004674]; signal transducer activity [GO:0004871]	intracellular signal transduction [GO:0035556]
C4LUZ4	EHI_092300	Protein kinase, putative	protein kinase, putative	1301	Protein kinase domain	PlasmaMembrane	plasma membrane	1	1	Yes	No hits	8	Accessory factors involved in transport	8.A.23.1.12	Basigin (Basigin) Family	ATP binding [GO:0005524]; protein serine/threonine kinase activity [GO:0004674]; signal transducer activity [GO:0004871]	intracellular signal transduction [GO:0035556]
C4LVR6	EHI_186990	Tyrosine kinase, putative	tyrosine kinase, putative	892	Protein kinase domain	PlasmaMembrane	cytoplasm	1	1	Yes	No hits	8	Accessory factors involved in transport	8.A.23.1.12	Basigin (Basigin) Family	ATP binding [GO:0005524]; protein kinase activity [GO:0004672]; signal transducer activity [GO:0004871]	intracellular signal transduction [GO:0035556]; protein phosphorylation [GO:0006468]
C4LZI6	EHI_124500	Tyrosine kinase, putative	tyrosine kinase, putative	2577	Protein kinase domain	PlasmaMembrane	cytoplasm	2	1	Yes	No hits	8	Accessory factors involved in transport	8.A.23.1.12	Basigin (Basigin) Family	ATP binding [GO:0005524]; protein serine/threonine kinase activity [GO:0004674]; signal transducer activity [GO:0004871]	intracellular signal transduction [GO:0035556]
C4M683	EHI_117680	Tyrosine kinase, putative	tyrosine kinase, putative	1764	Protein kinase domain	PlasmaMembrane	cytoplasm	2	1	Yes	No hits	8	Accessory factors involved in transport	8.A.23.1.12	Basigin (Basigin) Family	ATP binding [GO:0005524]; protein serine/threonine kinase activity [GO:0004674]; signal transducer activity [GO:0004871]	intracellular signal transduction [GO:0035556]
B1N339	EHI_009580	Tyrosine kinase, putative	tyrosine kinase, putative	1080	Protein tyrosine kinase	PlasmaMembrane	cytoplasm	2	1	Yes	No hits	8	Accessory factors involved in transport	8.A.23.1.12	Basigin (Basigin) Family	ATP binding [GO:0005524]; protein serine/threonine kinase activity [GO:0004674]; signal transducer activity [GO:0004871]	intracellular signal transduction [GO:0035556]
C4LUB2	EHI_110650	Tyrosine kinase, putative	tyrosine kinase, putative	1730	Protein tyrosine kinase	PlasmaMembrane	cytoplasm	1	1	Yes	No hits	8	Accessory factors involved in transport	8.A.23.1.12	Basigin (Basigin) Family	ATP binding [GO:0005524]; protein serine/threonine kinase activity [GO:0004674]; signal transducer activity [GO:0004871]	intracellular signal transduction [GO:0035556]
C4LUL7	EHI_023050	Protein kinase domain containing protein	protein kinase domain containing protein	1176	Protein tyrosine kinase	PlasmaMembrane	cytoplasm	2	1	Yes	No hits	8	Accessory factors involved in transport	8.A.23.1.12	Basigin (Basigin) Family	ATP binding [GO:0005524]; protein kinase activity [GO:0004672]; signal transducer activity [GO:0004871]	intracellular signal transduction [GO:0035556]; protein phosphorylation [GO:0006468]
C4LUS6	EHI_178610	Tyrosine kinase, putative	tyrosine kinase, putative	1816	Protein tyrosine kinase	PlasmaMembrane	plasma membrane	2	1	Yes	No hits	8	Accessory factors involved in transport	8.A.23.1.12	Basigin (Basigin) Family	ATP binding [GO:0005524]; protein serine/threonine kinase activity [GO:0004674]; signal transducer activity [GO:0004871]	intracellular signal transduction [GO:0035556]
C4LVF1	EHI_197350	Protein tyrosine kinase domain-containing protein	protein tyrosine kinase domain-containing protein	1055	Protein tyrosine kinase	PlasmaMembrane	plasma membrane	2	1	Yes	No hits	8	Accessory factors involved in transport	8.A.23.1.12	Basigin (Basigin) Family	ATP binding [GO:0005524]; protein kinase activity [GO:0004672]; signal transducer activity [GO:0004871]	intracellular signal transduction [GO:0035556]; protein phosphorylation [GO:0006468]
C4LWX5	EHI_127000	Protein tyrosine kinase domain-containing protein	protein tyrosine kinase domain-containing protein	1073	Protein tyrosine kinase	PlasmaMembrane	cytoplasm	1	1	No	No hits	8	Accessory factors involved in transport	8.A.23.1.12	Basigin (Basigin) Family	ATP binding [GO:0005524]; protein kinase activity [GO:0004672]; signal transducer activity [GO:0004871]	intracellular signal transduction [GO:0035556]; protein phosphorylation [GO:0006468]
C4LYF5	EHI_008220	Protein kinase domain containing protein	protein kinase domain containing protein	611	Protein tyrosine kinase	PlasmaMembrane	plasma membrane	1	2	Yes	No hits	8	Accessory factors involved in transport	8.A.23.1.12	Basigin (Basigin) Family	ATP binding [GO:0005524]; protein kinase activity [GO:0004672]
C4LZE4	EHI_137810	Protein kinase domain containing protein	protein kinase domain containing protein	304	Protein tyrosine kinase	PlasmaMembrane	plasma membrane	1	1	No	No hits	8	Accessory factors involved in transport	8.A.23.1.12	Basigin (Basigin) Family	ATP binding [GO:0005524]; protein kinase activity [GO:0004672]
C4LZX6	EHI_065500	Protein kinase, putative	tyrosin kinase, putative	671	Protein tyrosine kinase	PlasmaMembrane	cytoplasm	2	1	No	No hits	8	Accessory factors involved in transport	8.A.23.1.12	Basigin (Basigin) Family	ATP binding [GO:0005524]; protein kinase activity [GO:0004672]
C4M024	EHI_134750	Protein tyrosine kinase domain-containing protein	protein tyrosine kinase domain-containing protein	1112	Protein tyrosine kinase	PlasmaMembrane	secreted	1	1	Yes	No hits	8	Accessory factors involved in transport	8.A.23.1.12	Basigin (Basigin) Family	ATP binding [GO:0005524]; protein kinase activity [GO:0004672]; signal transducer activity [GO:0004871]	intracellular signal transduction [GO:0035556]; protein phosphorylation [GO:0006468]
C4M185	EHI_188110	Protein kinase, putative	protein kinase, putative	951	Protein tyrosine kinase	PlasmaMembrane	cytoplasm	2	2	Yes	No hits	8	Accessory factors involved in transport	8.A.23.1.12	Basigin (Basigin) Family	ATP binding [GO:0005524]; protein kinase activity [GO:0004672]; signal transducer activity [GO:0004871]	intracellular signal transduction [GO:0035556]; protein phosphorylation [GO:0006468]
C4M3L3	EHI_109950	Protein tyrosine kinase domain-containing protein	protein tyrosine kinase domain-containing protein	1154	Protein tyrosine kinase	PlasmaMembrane	plasma membrane	2	1	Yes	No hits	8	Accessory factors involved in transport	8.A.23.1.12	Basigin (Basigin) Family	ATP binding [GO:0005524]; protein kinase activity [GO:0004672]; signal transducer activity [GO:0004871]	intracellular signal transduction [GO:0035556]; protein phosphorylation [GO:0006468]
C4M4X4	EHI_119250	Tyrosine kinase, putative	tyrosine kinase, putative	544	Protein tyrosine kinase	PlasmaMembrane	cytoplasm	1	1	No	No hits	8	Accessory factors involved in transport	8.A.23.1.12	Basigin (Basigin) Family	ATP binding [GO:0005524]; protein serine/threonine kinase activity [GO:0004674]; signal transducer activity [GO:0004871]	intracellular signal transduction [GO:0035556]
C4M5U4	EHI_082220	Protein tyrosine kinase domain-containing protein	protein tyrosine kinase domain-containing protein	1380	Protein tyrosine kinase	PlasmaMembrane	cytoplasm	2	1	Yes	No hits	8	Accessory factors involved in transport	8.A.23.1.12	Basigin (Basigin) Family	ATP binding [GO:0005524]; protein kinase activity [GO:0004672]; signal transducer activity [GO:0004871]	intracellular signal transduction [GO:0035556]; protein phosphorylation [GO:0006468]
C4M635	EHI_179840	Serine/threonine-protein kinase, putative	tyrosin kinase, putative	670	Protein tyrosine kinase	PlasmaMembrane	cytoplasm	1	1	Yes	No hits	8	Accessory factors involved in transport	8.A.23.1.12	Basigin (Basigin) Family	ATP binding [GO:0005524]; protein kinase activity [GO:0004672]; signal transducer activity [GO:0004871]	intracellular signal transduction [GO:0035556]; protein phosphorylation [GO:0006468]
C4M695	EHI_081790	Protein kinase domain containing protein	protein kinase domain containing protein	1183	Protein tyrosine kinase	PlasmaMembrane	cytoplasm	1	1	Yes	No hits	8	Accessory factors involved in transport	8.A.23.1.12	Basigin (Basigin) Family	ATP binding [GO:0005524]; protein kinase activity [GO:0004672]; signal transducer activity [GO:0004871]	intracellular signal transduction [GO:0035556]; protein phosphorylation [GO:0006468]
C4M6K2	EHI_065240	Uncharacterized protein	hypothetical protein	1916	Protein tyrosine kinase	PlasmaMembrane	plasma membrane	2	1	Yes	No hits	8	Accessory factors involved in transport	8.A.23.1.12	Basigin (Basigin) Family	ATP binding [GO:0005524]; protein serine/threonine kinase activity [GO:0004674]; signal transducer activity [GO:0004871]	intracellular signal transduction [GO:0035556]
C4M6P3	EHI_171310	Protein kinase domain containing protein	protein kinase domain containing protein	635	Protein tyrosine kinase	PlasmaMembrane	cytoplasm	1	1	Yes	No hits	8	Accessory factors involved in transport	8.A.23.1.12	Basigin (Basigin) Family	ATP binding [GO:0005524]; protein serine/threonine kinase activity [GO:0004674]; signal transducer activity [GO:0004871]	intracellular signal transduction [GO:0035556]
C4M6Q6	EHI_201270	Protein tyrosine kinase domain-containing protein	protein tyrosine kinase domain-containing protein	1199	Protein tyrosine kinase	PlasmaMembrane	plasma membrane	2	1	Yes	No hits	8	Accessory factors involved in transport	8.A.23.1.12	Basigin (Basigin) Family	ATP binding [GO:0005524]; protein kinase activity [GO:0004672]; signal transducer activity [GO:0004871]	intracellular signal transduction [GO:0035556]; protein phosphorylation [GO:0006468]
C4M700	EHI_057680	Protein kinase, putative	protein kinase, putative	1061	Protein tyrosine kinase	PlasmaMembrane	cytoplasm	2	1	Yes	No hits	8	Accessory factors involved in transport	8.A.23.1.12	Basigin (Basigin) Family	ATP binding [GO:0005524]; protein kinase activity [GO:0004672]; signal transducer activity [GO:0004871]	intracellular signal transduction [GO:0035556]; protein phosphorylation [GO:0006468]
C4M8B8	EHI_101280	Protein tyrosine kinase domain-containing protein	protein tyrosine kinase domain-containing protein	1196	Protein tyrosine kinase	PlasmaMembrane	cytoplasm	2	1	Yes	No hits	8	Accessory factors involved in transport	8.A.23.1.12	Basigin (Basigin) Family	ATP binding [GO:0005524]; protein kinase activity [GO:0004672]; signal transducer activity [GO:0004871]	intracellular signal transduction [GO:0035556]; protein phosphorylation [GO:0006468]
C4M8M5	EHI_114420	Tyrosine kinase, putative	tyrosine kinase, putative	1056	Protein tyrosine kinase	PlasmaMembrane	plasma membrane	2	1	No	No hits	8	Accessory factors involved in transport	8.A.23.1.12	Basigin (Basigin) Family	ATP binding [GO:0005524]; protein serine/threonine kinase activity [GO:0004674]; signal transducer activity [GO:0004871]	intracellular signal transduction [GO:0035556]
C4M8T7	EHI_143790	Receptor protein kinase, putative	receptor protein kinase, putative	1039	Protein tyrosine kinase	PlasmaMembrane	plasma membrane	2	1	Yes	No hits	8	Accessory factors involved in transport	8.A.23.1.12	Basigin (Basigin) Family	ATP binding [GO:0005524]; protein serine/threonine kinase activity [GO:0004674]; signal transducer activity [GO:0004871]	intracellular signal transduction [GO:0035556]
C4M935	EHI_097640	Protein kinase, putative	tyrosin kinase, putative	686	Protein tyrosine kinase	PlasmaMembrane	cytoplasm	1	1	No	No hits	8	Accessory factors involved in transport	8.A.23.1.12	Basigin (Basigin) Family	ATP binding [GO:0005524]; protein kinase activity [GO:0004672]; signal transducer activity [GO:0004871]	intracellular signal transduction [GO:0035556]; protein phosphorylation [GO:0006468]
C4M963	EHI_135730	Tyrosine kinase, putative	tyrosine kinase, putative	1336	Protein tyrosine kinase	PlasmaMembrane	plasma membrane	1	1	Yes	No hits	8	Accessory factors involved in transport	8.A.23.1.12	Basigin (Basigin) Family	ATP binding [GO:0005524]; protein serine/threonine kinase activity [GO:0004674]; signal transducer activity [GO:0004871]	intracellular signal transduction [GO:0035556]
C4MA43	EHI_067070	Protein kinase, putative	protein kinase, putative	1198	Protein tyrosine kinase	PlasmaMembrane	cytoplasm	2	1	Yes	No hits	8	Accessory factors involved in transport	8.A.23.1.12	Basigin (Basigin) Family	ATP binding [GO:0005524]; protein kinase activity [GO:0004672]; signal transducer activity [GO:0004871]	intracellular signal transduction [GO:0035556]; protein phosphorylation [GO:0006468]
C4MB68	EHI_040850	Protein kinase domain containing protein	protein kinase domain containing protein	1345	Protein tyrosine kinase	PlasmaMembrane	plasma membrane	1	1	Yes	No hits	8	Accessory factors involved in transport	8.A.23.1.12	Basigin (Basigin) Family	ATP binding [GO:0005524]; protein kinase activity [GO:0004672]; signal transducer activity [GO:0004871]	intracellular signal transduction [GO:0035556]; protein phosphorylation [GO:0006468]
C4LZL7	EHI_174920	Uncharacterized protein	hypothetical protein	1920	Protein tyrosine kinase	PlasmaMembrane	plasma membrane	1	1	Yes	No hits	8	Accessory factors involved in transport	8.A.23.1.7	Basigin (Basigin) Family	ATP binding [GO:0005524]; protein kinase activity [GO:0004672]; signal transducer activity [GO:0004871]	intracellular signal transduction [GO:0035556]; protein phosphorylation [GO:0006468]
C4M1S0	EHI_164380	Protein kinase domain containing protein	protein kinase domain containing protein	1136	Protein tyrosine kinase	PlasmaMembrane	cytoplasm	1	1	Yes	No hits	8	Accessory factors involved in transport	8.A.23.1.7	Basigin (Basigin) Family	ATP binding [GO:0005524]; protein kinase activity [GO:0004672]; signal transducer activity [GO:0004871]	intracellular signal transduction [GO:0035556]; protein phosphorylation [GO:0006468]
C4M256	EHI_174080	Protein kinase, putative	protein kinase, putative	1585	Protein tyrosine kinase	PlasmaMembrane	cytoplasm	1	1	Yes	No hits	8	Accessory factors involved in transport	8.A.23.1.7	Basigin (Basigin) Family	ATP binding [GO:0005524]; protein kinase activity [GO:0004672]
C4M420	EHI_114130	Protein kinase domain containing protein	protein kinase domain containing protein	1092	Protein tyrosine kinase	PlasmaMembrane	cytoplasm	2	1	Yes	No hits	8	Accessory factors involved in transport	8.A.23.1.7	Basigin (Basigin) Family	ATP binding [GO:0005524]; protein kinase activity [GO:0004672]; signal transducer activity [GO:0004871]	intracellular signal transduction [GO:0035556]; protein phosphorylation [GO:0006468]
C4M980	EHI_124860	Protein kinase, putative	protein kinase, putative	1087	Protein tyrosine kinase	PlasmaMembrane	cytoplasm	2	2	Yes	No hits	8	Accessory factors involved in transport	8.A.23.1.7	Basigin (Basigin) Family	ATP binding [GO:0005524]; protein kinase activity [GO:0004672]; signal transducer activity [GO:0004871]	intracellular signal transduction [GO:0035556]; protein phosphorylation [GO:0006468]
C4M423	EHI_114160	Protein tyrosine kinase domain-containing protein	protein tyrosine kinase domain-containing protein	1070	Protein tyrosine kinase	PlasmaMembrane	cytoplasm	2	1	Yes	No hits	8	Accessory factors involved in transport	8.A.23.1.9	Basigin (Basigin) Family	ATP binding [GO:0005524]; protein kinase activity [GO:0004672]; signal transducer activity [GO:0004871]	intracellular signal transduction [GO:0035556]; protein phosphorylation [GO:0006468]
C4M4M4	EHI_189290	Protein tyrosine kinase domain-containing protein	protein tyrosine kinase domain-containing protein	1215	Protein tyrosine kinase	PlasmaMembrane	cytoplasm	2	1	Yes	No hits	8	Accessory factors involved in transport	8.A.23.1.9	Basigin (Basigin) Family	ATP binding [GO:0005524]; protein kinase activity [GO:0004672]; signal transducer activity [GO:0004871]	intracellular signal transduction [GO:0035556]; protein phosphorylation [GO:0006468]
C4M6E4	EHI_142740	Uncharacterized protein	hypothetical protein	316	LEM3 (ligand-effect modulator 3) family / CDC50 family	PlasmaMembrane	endoplasmic reticulum membrane	2	2	No	Anion	8	Accessory factors involved in transport	8.A.27.1.4	CDC50 P-type ATPase Lipid Flippase β-Subunit (CDC50) Family
C4M992	EHI_075690	Uncharacterized protein	hypothetical protein	218	Tetraspanin family	PlasmaMembrane	endoplasmic reticulum membrane	4	4	No	Electron/Sugar/Other	8	Accessory factors involved in transport	8.A.40.1.1	Tetraspanin (Tetraspanin) Family
C4M3W1	EHI_016390	Uncharacterized protein	hypothetical protein	196	Tetraspanin family	PlasmaMembrane	mitochondrion membrane	4	3	No	No hits	8	Accessory factors involved in transport	8.A.40.1.8	Tetraspanin (Tetraspanin) Family
C4M9J5	EHI_107790	Uncharacterized protein	hypothetical protein	195	Tetraspanin family	PlasmaMembrane	mitochondrion membrane	4	4	No	No hits	8	Accessory factors involved in transport	8.A.40.1.8	Tetraspanin (Tetraspanin) Family
B1N3A0	EHI_135050	Uncharacterized protein	hypothetical protein	500	Wnt-binding factor required for Wnt secretion	PlasmaMembrane	endoplasmic reticulum membrane	9	8	No	No hits	8	Accessory factors involved in transport	8.A.56.1.3	Wntless Protein (Wls) Family
C4LUD7	EHI_049350	Uncharacterized protein	hypothetical protein	538	Wnt-binding factor required for Wnt secretion	PlasmaMembrane	endoplasmic reticulum membrane	8	8	No	No hits	8	Accessory factors involved in transport	8.A.56.1.3	Wntless Protein (Wls) Family
C4M4J4	EHI_139040	Uncharacterized protein	hypothetical protein, conserved	492	Wnt-binding factor required for Wnt secretion	PlasmaMembrane	endoplasmic reticulum membrane	7	8	No	Cation	8	Accessory factors involved in transport	8.A.56.1.3	Wntless Protein (Wls) Family
C4M6D2	EHI_142960	Uncharacterized protein	hypothetical protein	518	Wnt-binding factor required for Wnt secretion	PlasmaMembrane	endoplasmic reticulum membrane	8	8	No	No hits	8	Accessory factors involved in transport	8.A.56.1.3	Wntless Protein (Wls) Family
C4M9X2	EHI_179320	Uncharacterized protein	hypothetical protein	492	Wnt-binding factor required for Wnt secretion	PlasmaMembrane	endoplasmic reticulum membrane	8	8	No	Cation	8	Accessory factors involved in transport	8.A.56.1.3	Wntless Protein (Wls) Family
Q5EHP7	EHI_025100	G protein-coupled receptor 1	hypothetical protein, conserved	491	Wnt-binding factor required for Wnt secretion	PlasmaMembrane	endoplasmic reticulum membrane	7	8	No	Anion/Other	8	Accessory factors involved in transport	8.A.56.1.3	Wntless Protein (Wls) Family
C4LZF3	EHI_137920	Uncharacterized protein	hypothetical protein, conserved	496	Wnt-binding factor required for Wnt secretion	PlasmaMembrane	endoplasmic reticulum membrane	8	8	No	Sugar	8	Accessory factors involved in transport	8.A.56.1.4	Wntless Protein (Wls) Family
C4MA86	EHI_039820	Uncharacterized protein	hypothetical protein	490	Wnt-binding factor required for Wnt secretion	PlasmaMembrane	endoplasmic reticulum membrane	8	8	No	Anion/Other	8	Accessory factors involved in transport	8.A.56.1.4	Wntless Protein (Wls) Family
C4M8E7	EHI_115360	Uncharacterized protein	hypothetical protein	143	Cornichon protein	PlasmaMembrane	endoplasmic reticulum membrane	3	4	No	No hits	8	Accessory factors involved in transport	8.A.61.1.1	Endoplasmic Reticulum-derived Vesicle Protein, Erv14 (Erv14) Family		vesicle-mediated transport [GO:0016192]
C4MAS2	EHI_049050	Uncharacterized protein	hypothetical protein	148	Cornichon protein	PlasmaMembrane	endoplasmic reticulum membrane	3	4	No	No hits	8	Accessory factors involved in transport	8.A.61.1.9	Endoplasmic Reticulum-derived Vesicle Protein, Erv14 (Erv14) Family		vesicle-mediated transport [GO:0016192]
B1N3X9	EHI_082580	Uncharacterized protein	hypothetical protein	373	Endomembrane protein 70	PlasmaMembrane	endoplasmic reticulum membrane	9	9	No	Anion	8	Accessory factors involved in transport	8.A.68.1.6	Endomembrane protein-70 (EMP70) Family
Q1EQ04	EHI_082090	EhSyntaxin A	hypothetical protein	214	SNARE domain	Nuclear	vacuole membrane	1	1	No	No hits	8	Accessory factors involved in transport	8.A.91.1.1	Syntaxin (Syntaxin) Family
C4LV39	EHI_182580	Syntaxin PM-like protein	syntaxin PM-like protein	238	SNARE domain	PlasmaMembrane	vacuole membrane	1	1	No	No hits	8	Accessory factors involved in transport	8.A.91.1.2	Syntaxin (Syntaxin) Family	SNAP receptor activity [GO:0005484]; SNARE binding [GO:0000149]	exocytosis [GO:0006887]; intracellular protein transport [GO:0006886]; vesicle docking [GO:0048278]; vesicle fusion [GO:0006906]
B1N4Q5	No hits	Syntaxin 5-like protein, putative	No hits	300	Helical region found in SNAREs	Nuclear	golgi apparatus membrane	1	1	No	No hits	8	Accessory factors involved in transport	8.A.91.1.4	Syntaxin (Syntaxin) Family
C4LT43	EHI_148750	Syntaxin, putative	syntaxin, putative	278	SNARE domain	Nuclear	vacuole membrane	1	1	No	No hits	8	Accessory factors involved in transport	8.A.91.1.4	Syntaxin (Syntaxin) Family
Q1EQ05	EHI_164320	EhSyntaxin 16	syntaxin, putative	278	SNARE domain	Nuclear	vacuole membrane	1	1	No	No hits	8	Accessory factors involved in transport	8.A.91.1.4	Syntaxin (Syntaxin) Family
Q1EQ08	EHI_052830	EhSyntaxin 1B	syntaxin, putative	318	SNARE domain	Nuclear	golgi apparatus membrane	1	1	No	No hits	8	Accessory factors involved in transport	8.A.91.1.4	Syntaxin (Syntaxin) Family
C4M112	EHI_105070	Uncharacterized protein	hypothetical protein	319	G protein-coupled glucose receptor regulating Gpa2 C-term	PlasmaMembrane	plasma membrane	8	7	Yes	No hits	9	Incompletely characterized transport systems	9.A.14.14.2	G-protein-coupled receptor (GPCR) Family	transmembrane signaling receptor activity [GO:0004888]	cell surface receptor signaling pathway [GO:0007166]
B1N383	EHI_064610	Protein kinase domain containing protein	protein kinase domain containing protein	1037	Serine/Threonine protein kinases, catalytic domain	PlasmaMembrane	plasma membrane	2	1	Yes	No hits	9	Incompletely characterized transport systems	9.A.15.1.1	Autophagy-related Phagophore-formation Transporter (APT) Family	ATP binding [GO:0005524]; protein serine/threonine kinase activity [GO:0004674]; signal transducer activity [GO:0004871]	intracellular signal transduction [GO:0035556]
C4LZM6	EHI_175010	Autophagy-related protein 9	hypothetical protein	296	Autophagy protein Apg9	PlasmaMembrane	endoplasmic reticulum membrane	4	4	No	No hits	9	Incompletely characterized transport systems	9.A.15.1.1	Autophagy-related Phagophore-formation Transporter (APT) Family		autophagy [GO:0006914]; protein transport [GO:0015031]
C4M606	EHI_072010	Autophagy-related protein 9	hypothetical protein	533	Autophagy protein Apg9	PlasmaMembrane	endoplasmic reticulum membrane	5	6	No	No hits	9	Incompletely characterized transport systems	9.A.15.1.1	Autophagy-related Phagophore-formation Transporter (APT) Family		autophagy [GO:0006914]; protein transport [GO:0015031]
B1N574	EHI_195370	Protein kinase domain containing protein	protein kinase domain containing protein	1356	Protein kinase domain	PlasmaMembrane	secreted	1	1	Yes	No hits	9	Incompletely characterized transport systems	9.A.15.3.1	Autophagy-related Phagophore-formation Transporter (APT) Family	ATP binding [GO:0005524]; protein serine/threonine kinase activity [GO:0004674]; signal transducer activity [GO:0004871]	intracellular signal transduction [GO:0035556]
B1N5C2	EHI_128800	Uncharacterized protein (Fragment)	hypothetical protein	1262	Protein kinase domain	PlasmaMembrane	cytoplasm	1	1	Yes	No hits	9	Incompletely characterized transport systems	9.A.15.3.1	Autophagy-related Phagophore-formation Transporter (APT) Family	ATP binding [GO:0005524]; protein serine/threonine kinase activity [GO:0004674]; signal transducer activity [GO:0004871]	intracellular signal transduction [GO:0035556]
B1N2Q1	EHI_103240	Protein kinase domain containing protein	protein kinase domain containing protein	1355	Protein kinase domain	PlasmaMembrane	plasma membrane	1	1	Yes	No hits	9	Incompletely characterized transport systems	9.A.15.3.1	Autophagy-related Phagophore-formation Transporter (APT) Family	ATP binding [GO:0005524]; protein serine/threonine kinase activity [GO:0004674]; signal transducer activity [GO:0004871]	intracellular signal transduction [GO:0035556]
B1N4R4	EHI_059040	Protein kinase domain containing protein	protein kinase domain containing protein	1342	Protein kinase domain	PlasmaMembrane	plasma membrane	1	1	Yes	No hits	9	Incompletely characterized transport systems	9.A.15.3.1	Autophagy-related Phagophore-formation Transporter (APT) Family	ATP binding [GO:0005524]; protein serine/threonine kinase activity [GO:0004674]; signal transducer activity [GO:0004871]	intracellular signal transduction [GO:0035556]
B1N550	EHI_001630	Tyrosine kinase, putative (Fragment)	hypothetical protein	623	Serine/Threonine protein kinases, catalytic domain	PlasmaMembrane	cytoplasm	1	1	No	No hits	9	Incompletely characterized transport systems	9.A.15.3.1	Autophagy-related Phagophore-formation Transporter (APT) Family	ATP binding [GO:0005524]; protein serine/threonine kinase activity [GO:0004674]; signal transducer activity [GO:0004871]	intracellular signal transduction [GO:0035556]
B1N5W9	EHI_115050	Protein kinase, putative (Fragment)	protein kinase, putative	437	Serine/Threonine protein kinases, catalytic domain	PlasmaMembrane	cytoplasm	2	1	No	No hits	9	Incompletely characterized transport systems	9.A.15.3.1	Autophagy-related Phagophore-formation Transporter (APT) Family	ATP binding [GO:0005524]; protein serine/threonine kinase activity [GO:0004674]; signal transducer activity [GO:0004871]	intracellular signal transduction [GO:0035556]
C4LU09	EHI_068160	Tyrosine kinase, putative	tyrosine kinase, putative	2171	Serine/Threonine protein kinases, catalytic domain	PlasmaMembrane	cytoplasm	1	1	Yes	No hits	9	Incompletely characterized transport systems	9.A.15.3.1	Autophagy-related Phagophore-formation Transporter (APT) Family	ATP binding [GO:0005524]; protein serine/threonine kinase activity [GO:0004674]; signal transducer activity [GO:0004871]	intracellular signal transduction [GO:0035556]
C4LU28	EHI_068350	Protein kinase, putative	protein kinase, putative	765	Serine/Threonine protein kinases, catalytic domain	PlasmaMembrane	endoplasmic reticulum membrane	1	2	No	No hits	9	Incompletely characterized transport systems	9.A.15.3.1	Autophagy-related Phagophore-formation Transporter (APT) Family	ATP binding [GO:0005524]; protein kinase activity [GO:0004672]; ribonuclease activity [GO:0004540]	mRNA processing [GO:0006397]
C4LXM6	EHI_073660	Tyrosine kinase, putative	tyrosine kinase, putative	1309	Serine/Threonine protein kinases, catalytic domain	PlasmaMembrane	secreted	1	1	Yes	No hits	9	Incompletely characterized transport systems	9.A.15.3.1	Autophagy-related Phagophore-formation Transporter (APT) Family	ATP binding [GO:0005524]; protein serine/threonine kinase activity [GO:0004674]; signal transducer activity [GO:0004871]	intracellular signal transduction [GO:0035556]
C4LXW0	EHI_087800	Tyrosine kinase, putative	tyrosine kinase, putative	1104	Serine/Threonine protein kinases, catalytic domain	PlasmaMembrane	plasma membrane	1	1	Yes	No hits	9	Incompletely characterized transport systems	9.A.15.3.1	Autophagy-related Phagophore-formation Transporter (APT) Family	ATP binding [GO:0005524]; protein kinase activity [GO:0004672]; signal transducer activity [GO:0004871]	intracellular signal transduction [GO:0035556]; protein phosphorylation [GO:0006468]
C4LYK3	EHI_118410	Tyrosine kinase, putative	tyrosine kinase, putative	1697	Serine/Threonine protein kinases, catalytic domain	PlasmaMembrane	cytoplasm	1	1	Yes	No hits	9	Incompletely characterized transport systems	9.A.15.3.1	Autophagy-related Phagophore-formation Transporter (APT) Family	ATP binding [GO:0005524]; protein serine/threonine kinase activity [GO:0004674]; signal transducer activity [GO:0004871]	intracellular signal transduction [GO:0035556]
C4LZW0	EHI_194480	Tyrosine kinase, putative	tyrosine kinase, putative	897	Serine/Threonine protein kinases, catalytic domain	PlasmaMembrane	cytoplasm	2	1	Yes	No hits	9	Incompletely characterized transport systems	9.A.15.3.1	Autophagy-related Phagophore-formation Transporter (APT) Family	ATP binding [GO:0005524]; protein kinase activity [GO:0004672]; signal transducer activity [GO:0004871]	intracellular signal transduction [GO:0035556]; protein phosphorylation [GO:0006468]
C4M105	EHI_135190	Protein kinase, putative	protein kinase, putative	895	Serine/Threonine protein kinases, catalytic domain	PlasmaMembrane	plasma membrane	2	1	Yes	No hits	9	Incompletely characterized transport systems	9.A.15.3.1	Autophagy-related Phagophore-formation Transporter (APT) Family	ATP binding [GO:0005524]; protein kinase activity [GO:0004672]; signal transducer activity [GO:0004871]	intracellular signal transduction [GO:0035556]; protein phosphorylation [GO:0006468]
C4M282	EHI_180320	Tyrosine kinase, putative	tyrosine kinase, putative	1465	Serine/Threonine protein kinases, catalytic domain	PlasmaMembrane	cytoplasm	1	1	Yes	No hits	9	Incompletely characterized transport systems	9.A.15.3.1	Autophagy-related Phagophore-formation Transporter (APT) Family	ATP binding [GO:0005524]; protein serine/threonine kinase activity [GO:0004674]; signal transducer activity [GO:0004871]	intracellular signal transduction [GO:0035556]
C4M7D0	EHI_011170	Protein kinase, putative	protein kinase, putative	507	Serine/Threonine protein kinases, catalytic domain	PlasmaMembrane	cytoplasm	2	1	No	No hits	9	Incompletely characterized transport systems	9.A.15.3.1	Autophagy-related Phagophore-formation Transporter (APT) Family	ATP binding [GO:0005524]; protein serine/threonine kinase activity [GO:0004674]; signal transducer activity [GO:0004871]	intracellular signal transduction [GO:0035556]
C4M7N9	EHI_037140	Receptor protein kinase, putative	receptor protein kinase, putative	1150	Protein kinase domain	PlasmaMembrane	cytoplasm	1	1	Yes	No hits	9	Incompletely characterized transport systems	9.A.15.3.1	Autophagy-related Phagophore-formation Transporter (APT) Family	ATP binding [GO:0005524]; protein kinase activity [GO:0004672]; signal transducer activity [GO:0004871]	intracellular signal transduction [GO:0035556]; protein phosphorylation [GO:0006468]
C4M7Q9	EHI_120930	Protein kinase domain containing protein	protein kinase domain containing protein	1364	Serine/Threonine protein kinases, catalytic domain	PlasmaMembrane	cytoplasm	1	0	Yes	No hits	9	Incompletely characterized transport systems	9.A.15.3.1	Autophagy-related Phagophore-formation Transporter (APT) Family	ATP binding [GO:0005524]; protein serine/threonine kinase activity [GO:0004674]; signal transducer activity [GO:0004871]	intracellular signal transduction [GO:0035556]
C4M7Z7	EHI_167650	Tyrosine kinase, putative	tyrosine kinase, putative	1279	Serine/Threonine protein kinases, catalytic domain	PlasmaMembrane	cytoplasm	1	0	Yes	No hits	9	Incompletely characterized transport systems	9.A.15.3.1	Autophagy-related Phagophore-formation Transporter (APT) Family	ATP binding [GO:0005524]; protein serine/threonine kinase activity [GO:0004674]; signal transducer activity [GO:0004871]	intracellular signal transduction [GO:0035556]
C4M8J0	EHI_062090	Protein kinase domain containing protein	protein kinase domain containing protein	1355	Serine/Threonine protein kinases, catalytic domain	PlasmaMembrane	secreted	1	1	Yes	No hits	9	Incompletely characterized transport systems	9.A.15.3.1	Autophagy-related Phagophore-formation Transporter (APT) Family	ATP binding [GO:0005524]; protein serine/threonine kinase activity [GO:0004674]; signal transducer activity [GO:0004871]	intracellular signal transduction [GO:0035556]
C4M9E8	EHI_074740	Tyrosine kinase, putative	tyrosine kinase, putative	1277	Serine/Threonine protein kinases, catalytic domain	PlasmaMembrane	plasma membrane	2	1	Yes	No hits	9	Incompletely characterized transport systems	9.A.15.3.1	Autophagy-related Phagophore-formation Transporter (APT) Family	ATP binding [GO:0005524]; protein serine/threonine kinase activity [GO:0004674]; signal transducer activity [GO:0004871]	intracellular signal transduction [GO:0035556]
C4MA30	EHI_175920	Protein kinase, putative	protein kinase, putative	1084	Serine/Threonine protein kinases, catalytic domain	PlasmaMembrane	plasma membrane	1	1	No	No hits	9	Incompletely characterized transport systems	9.A.15.3.1	Autophagy-related Phagophore-formation Transporter (APT) Family	ATP binding [GO:0005524]; protein serine/threonine kinase activity [GO:0004674]; signal transducer activity [GO:0004871]	intracellular signal transduction [GO:0035556]
C4MBD2	EHI_034210	Protein kinase domain containing protein	protein kinase domain containing protein	1355	Serine/Threonine protein kinases, catalytic domain	PlasmaMembrane	cytoplasm	1	1	Yes	No hits	9	Incompletely characterized transport systems	9.A.15.3.1	Autophagy-related Phagophore-formation Transporter (APT) Family	ATP binding [GO:0005524]; protein serine/threonine kinase activity [GO:0004674]; signal transducer activity [GO:0004871]	intracellular signal transduction [GO:0035556]
C4M0B9	EHI_064500	Protein tyrosine kinase domain-containing protein	protein tyrosine kinase domain-containing protein	1191	Protein tyrosine kinase	PlasmaMembrane	plasma membrane	1	1	Yes	No hits	9	Incompletely characterized transport systems	9.A.15.3.1	Autophagy-related Phagophore-formation Transporter (APT) Family
C4M2D7	EHI_158180	Tyrosine kinase, putative	tyrosine kinase, putative	1691	Protein tyrosine kinase	PlasmaMembrane	plasma membrane	2	0	Yes	No hits	9	Incompletely characterized transport systems	9.A.15.3.1	Autophagy-related Phagophore-formation Transporter (APT) Family
C4M229	EHI_150480	Uncharacterized protein	hypothetical protein	496	Serine/Threonine protein kinases, catalytic domain	PlasmaMembrane	plasma membrane	1	1	Yes	No hits	9	Incompletely characterized transport systems	9.A.15.3.1	Autophagy-related Phagophore-formation Transporter (APT) Family
C4M410	EHI_195050	Tyrosine kinase, putative	tyrosine kinase, putative	1697	Serine/Threonine protein kinases, catalytic domain	Extracellular	plasma membrane	1	1	Yes	No hits	9	Incompletely characterized transport systems	9.A.15.3.1	Autophagy-related Phagophore-formation Transporter (APT) Family
C4M455	EHI_030420	Tyrosine kinase, putative	tyrosine kinase, putative	1100	Serine/Threonine protein kinases, catalytic domain	Extracellular	plasma membrane	1	1	Yes	No hits	9	Incompletely characterized transport systems	9.A.15.3.1	Autophagy-related Phagophore-formation Transporter (APT) Family
C4MAV1	EHI_020490	Uncharacterized protein	hypothetical protein, conserved	257	Arv1-like family	PlasmaMembrane	endoplasmic reticulum membrane	5	5	No	No hits	9	Incompletely characterized transport systems	9.A.19.1.2	Lipid Intermediate Transporter (Arv1) Family		intracellular sterol transport [GO:0032366]; regulation of plasma membrane sterol distribution [GO:0097036]; sphingolipid metabolic process [GO:0006665]; sterol metabolic process [GO:0016125]
C4M8G7	EHI_063000	Uncharacterized protein	hypothetical protein, conserved	375	Serine incorporator (Serinc)	PlasmaMembrane	endoplasmic reticulum membrane	9	9	No	No hits	9	Incompletely characterized transport systems	9.A.29.3.4	Lantibiotic Immunity Protein/Serine Connector Protein (LIP/SIP) Family	L-serine transmembrane transporter activity [GO:0015194]
C4M528	EHI_127810	PRA1 family protein	hypothetical protein	182	PRA1 family protein	PlasmaMembrane	endoplasmic reticulum membrane	4	4	No	Anion	9	Incompletely characterized transport systems	9.A.49.1.4	Prenylated Rab Acceptor Protein 1 (PRA1) Family
C4LTI4	EHI_011900	PRA1 family protein	hypothetical protein	150	PRA1 family protein	PlasmaMembrane	mitochondrion membrane	4	4	No	No hits	9	Incompletely characterized transport systems	9.A.49.1.5	Prenylated Rab Acceptor Protein 1 (PRA1) Family
C4M0X4	EHI_015360	Uncharacterized protein	hypothetical protein, conserved	481	LMBR1-like membrane protein	PlasmaMembrane	golgi apparatus membrane	10	9	No	Anion	9	Incompletely characterized transport systems	9.A.54.1.4	Lysosomal Cobalamin (B12) Transporter (L-B12T) Family
B1N4V5	EHI_048960	Uncharacterized protein	hypothetical protein	185	LMBR1-like membrane protein	PlasmaMembrane	golgi apparatus membrane	4	4	No	Anion	9	Incompletely characterized transport systems	9.A.54.1.4	Lysosomal Cobalamin (B12) Transporter (L-B12T) Family
B1N5T6	EHI_045920	Uncharacterized protein (Fragment)	hypothetical protein	217	LMBR1-like membrane protein	PlasmaMembrane	golgi apparatus membrane	5	5	No	Anion/Cation	9	Incompletely characterized transport systems	9.A.54.3.1	Lysosomal Cobalamin (B12) Transporter (L-B12T) Family
C4LUH4	EHI_049750	Uncharacterized protein	hypothetical protein, conserved	544	LMBR1-like membrane protein	PlasmaMembrane	golgi apparatus membrane	9	9	No	No hits	9	Incompletely characterized transport systems	9.A.54.3.1	Lysosomal Cobalamin (B12) Transporter (L-B12T) Family
C4M4T1	EHI_095190	Uncharacterized protein	hypothetical protein, conserved	585	LMBR1-like membrane protein	PlasmaMembrane	golgi apparatus membrane	9	9	No	Anion	9	Incompletely characterized transport systems	9.A.54.3.1	Lysosomal Cobalamin (B12) Transporter (L-B12T) Family
C4M8R3	EHI_181390	Uncharacterized protein	hypothetical protein, conserved	203	LMBR1-like membrane protein	PlasmaMembrane	endoplasmic reticulum membrane	3	3	No	No hits	9	Incompletely characterized transport systems	9.A.54.3.1	Lysosomal Cobalamin (B12) Transporter (L-B12T) Family
C4M915	EHI_192750	Uncharacterized protein	hypothetical protein, conserved	509	Putative integral membrane protein conserved region (DUF2404)	Nuclear	endoplasmic reticulum membrane	1	1	No	No hits	9	Incompletely characterized transport systems	9.A.58.1.1	Maintenance of Mitochondrial Morphology (MMM) Family
C4LXX0	EHI_035390	Phosphatidylinositol-glycan biosynthesis class O protein, putative	phosphatidylinositol-glycan biosynthesis class O protein, putative	870	Type I phosphodiesterase / nucleotide pyrophosphatase	PlasmaMembrane	endoplasmic reticulum membrane	13	0	No	Anion	9	Incompletely characterized transport systems	9.A.6.1.2	ATP Exporter (ATP-E) Family	mannose-ethanolamine phosphotransferase activity [GO:0051377]	GPI anchor biosynthetic process [GO:0006506]
C4M173	EHI_107320	Phosphatidylinositol-glycan biosynthesis class O protein, putative	phosphatidylinositol-glycan biosynthesis class O protein, putative	866	Type I phosphodiesterase / nucleotide pyrophosphatase	PlasmaMembrane	endoplasmic reticulum membrane	14	13	No	Anion	9	Incompletely characterized transport systems	9.A.6.1.2	ATP Exporter (ATP-E) Family	mannose-ethanolamine phosphotransferase activity [GO:0051377]	GPI anchor biosynthetic process [GO:0006506]
B1N2X7	EHI_014210	Uncharacterized protein	hypothetical protein	201	Ras family	PlasmaMembrane	cytoplasm	2	1	No	No hits	9	Incompletely characterized transport systems	9.A.63.1.1	Retromer-dependent Vacuolar Protein Sorting (R-VPS) Family	GTPase activity [GO:0003924]; GTP binding [GO:0005525]	signal transduction [GO:0007165]
C4LW15	EHI_126310	Rho family GTPase	Rho family GTPase	212	Ras family	PlasmaMembrane	cytoplasm	1	1	No	No hits	9	Incompletely characterized transport systems	9.A.63.1.1	Retromer-dependent Vacuolar Protein Sorting (R-VPS) Family	GTPase activity [GO:0003924]; GTP binding [GO:0005525]
C4LXQ9	EHI_014220	Small Rab GTPase, putative	small Rab GTPase, putative	201	Ras family	PlasmaMembrane	cytoplasm	1	0	No	Cation/Proteins/MRNA	9	Incompletely characterized transport systems	9.A.63.1.1	Retromer-dependent Vacuolar Protein Sorting (R-VPS) Family	GTPase activity [GO:0003924]; GTP binding [GO:0005525]	protein secretion [GO:0009306]; regulation of exocytosis [GO:0017157]; vesicle docking involved in exocytosis [GO:0006904]
C4M0X5	EHI_015370	Uncharacterized protein	hypothetical protein	1089	Paraquat-inducible protein A	PlasmaMembrane	plasma membrane	9	9	Yes	Cation/Other	9	Incompletely characterized transport systems	9.A.69.1.1	Intermembrane Phospholipid Translocase (IMPL-T) Family
C4M998	EHI_075660	CAAX prenyl protease, putative	CAAX prenyl protease, putative	416	CAAX prenyl protease 1, N-terminal	PlasmaMembrane	endoplasmic reticulum membrane	7	7	No	Anion	9	Incompletely characterized transport systems	9.B.1.1.2	Integral Membrane CAAX Protease (CAAX Protease) Family	metalloendopeptidase activity [GO:0004222]	CAAX-box protein processing [GO:0071586]
C4LVT7	EHI_187200	CAAX prenyl protease family	CAAX prenyl protease family	237	CAAX protease self-immunity	PlasmaMembrane	endoplasmic reticulum membrane	8	8	No	Anion/Cation	9	Incompletely characterized transport systems	9.B.1.2.6	Integral Membrane CAAX Protease (CAAX Protease) Family	cysteine-type endopeptidase activity [GO:0004197]; metalloendopeptidase activity [GO:0004222]	CAAX-box protein processing [GO:0071586]
B1N625	EHI_034110	Uncharacterized protein (Fragment)		251	Sulphur transport	PlasmaMembrane	golgi apparatus membrane	6	6	No	Sugar	9	Incompletely characterized transport systems	9.B.102.1.1	YedE/YeeE (YeeE) Family
B1N2T2	EHI_096500	Uncharacterized protein	UBA/TS-N domain-containing protein	286	Ubiquitin-associated domain	PlasmaMembrane	endoplasmic reticulum membrane	5	4	No	No hits	9	Incompletely characterized transport systems	9.B.104.1.2	Rhomboid Protease Family	ubiquitin binding [GO:0043130]	retrograde vesicle-mediated transport, Golgi to ER [GO:0006890]
C4M6J0	EHI_060330	Rhomboid-like protein (EC 3.4.21.-)	peptidase S54 (rhomboid) family protein	311	Rhomboid family	PlasmaMembrane	endoplasmic reticulum membrane	8	7	No	Anion	9	Incompletely characterized transport systems	9.B.104.1.2	Rhomboid Protease Family	serine-type endopeptidase activity [GO:0004252]
C4MAW9	EHI_029220	Peptidase S54 (Rhomboid) family protein	peptidase S54 (rhomboid) family protein	266	Rhomboid family	PlasmaMembrane	endoplasmic reticulum membrane	6	6	No	Anion/Cation	9	Incompletely characterized transport systems	9.B.104.1.2	Rhomboid Protease Family	serine-type endopeptidase activity [GO:0004252]
C4LVG2	EHI_197460	Rhomboid-like protein (EC 3.4.21.-)	peptidase S54 (rhomboid) family protein	304	Rhomboid family	PlasmaMembrane	endoplasmic reticulum membrane	7	7	No	Amino Acid/Cation/Sugar	9	Incompletely characterized transport systems	9.B.104.1.3	Rhomboid Protease Family	serine-type endopeptidase activity [GO:0004252]
C4M529	EHI_128190	Rhomboid-like protein (EC 3.4.21.-)	peptidase S54 (rhomboid) family protein	351	Rhomboid family	PlasmaMembrane	endoplasmic reticulum membrane	7	7	No	Sugar	9	Incompletely characterized transport systems	9.B.104.1.3	Rhomboid Protease Family	serine-type endopeptidase activity [GO:0004252]
C4LXK2	EHI_073370	Lipid phosphate phosphatase, putative (EC 3.1.3.-)	lipid phosphate phosphatase, putative	240	Acid phosphatase homologues	PlasmaMembrane	plasma membrane	6	6	No	Anion	9	Incompletely characterized transport systems	9.B.105.1.6	Lipoprotein Signal Peptidase/Phosphatase/Lead Resistance Fusion Protein (PbrBC) Family	phosphatidate phosphatase activity [GO:0008195]
C4M8U7	EHI_169660	Lipid phosphate phosphatase, putative	lipid phosphate phosphatase, putative	371	Acid phosphatase homologues	PlasmaMembrane	endoplasmic reticulum membrane	7	9	No	No hits	9	Incompletely characterized transport systems	9.B.105.1.7	Lipoprotein Signal Peptidase/Phosphatase/Lead Resistance Fusion Protein (PbrBC) Family
C4LSA3	EHI_153110	Dolichyldiphosphatase, putative (EC 3.6.1.43)	dolichyldiphosphatase, putative	194	Acid phosphatase homologues	PlasmaMembrane	endoplasmic reticulum membrane	5	5	No	No hits	9	Incompletely characterized transport systems	9.B.105.2.1	Lipoprotein Signal Peptidase/Phosphatase/Lead Resistance Fusion Protein (PbrBC) Family	dolichyldiphosphatase activity [GO:0047874]
C4M3P1	EHI_140690	Sphingosine-1-phosphate phosphatase, putative	sphingosine-1-phosphate phosphatase, putative	358	Acid phosphatase homologues	PlasmaMembrane	endoplasmic reticulum membrane	7	9	No	No hits	9	Incompletely characterized transport systems	9.B.105.2.1	Lipoprotein Signal Peptidase/Phosphatase/Lead Resistance Fusion Protein (PbrBC) Family
C4M9S8	EHI_056630	Lipid phosphate phosphatase, putative	lipid phosphate phosphatase, putative	402	Acid phosphatase homologues	PlasmaMembrane	endoplasmic reticulum membrane	7	8	No	No hits	9	Incompletely characterized transport systems	9.B.105.2.1	Lipoprotein Signal Peptidase/Phosphatase/Lead Resistance Fusion Protein (PbrBC) Family
B1N2E1	EHI_153600	PAP2 superfamily domain containing protein	PAP2 superfamily domain containing protein	137	Acid phosphatase homologues	PlasmaMembrane	endoplasmic reticulum membrane	3	3	No	No hits	9	Incompletely characterized transport systems	9.B.105.2.1	Lipoprotein Signal Peptidase/Phosphatase/Lead Resistance Fusion Protein (PbrBC) Family
C4LZI1	EHI_124450	Lipid phosphate phosphatase, putative (EC 3.1.3.-)	lipid phosphate phosphatase, putative	243	Acid phosphatase homologues	PlasmaMembrane	plasma membrane	6	6	No	No hits	9	Incompletely characterized transport systems	9.B.105.3.2	Lipoprotein Signal Peptidase/Phosphatase/Lead Resistance Fusion Protein (PbrBC) Family	phosphatidate phosphatase activity [GO:0008195]
C4M0I3	EHI_024410	Lipid phosphate phosphatase, putative (EC 3.1.3.-)	lipid phosphate phosphatase, putative	245	Acid phosphatase homologues	PlasmaMembrane	plasma membrane	6	6	No	No hits	9	Incompletely characterized transport systems	9.B.105.3.2	Lipoprotein Signal Peptidase/Phosphatase/Lead Resistance Fusion Protein (PbrBC) Family	phosphatidate phosphatase activity [GO:0008195]
C4M210	EHI_165320	Lipid phosphate phosphatase, putative (EC 3.1.3.-)	lipid phosphate phosphatase, putative	255	Acid phosphatase homologues	PlasmaMembrane	vacuole membrane	5	6	No	No hits	9	Incompletely characterized transport systems	9.B.105.3.2	Lipoprotein Signal Peptidase/Phosphatase/Lead Resistance Fusion Protein (PbrBC) Family	phosphatidate phosphatase activity [GO:0008195]
C4M5X2	EHI_136980	Lipid phosphate phosphatase, putative (EC 3.1.3.-)	lipid phosphate phosphatase, putative	259	Acid phosphatase homologues	PlasmaMembrane	vacuole membrane	6	6	No	No hits	9	Incompletely characterized transport systems	9.B.105.3.2	Lipoprotein Signal Peptidase/Phosphatase/Lead Resistance Fusion Protein (PbrBC) Family	phosphatidate phosphatase activity [GO:0008195]
C4MB00	EHI_176830	Lipid phosphate phosphatase, putative (EC 3.1.3.-)	lipid phosphate phosphatase, putative	245	Acid phosphatase homologues	PlasmaMembrane	vacuole membrane	6	6	No	No hits	9	Incompletely characterized transport systems	9.B.105.3.2	Lipoprotein Signal Peptidase/Phosphatase/Lead Resistance Fusion Protein (PbrBC) Family	phosphatidate phosphatase activity [GO:0008195]
C4M985	EHI_119910	Lipid phosphate phosphatase, putative	lipid phosphate phosphatase, putative	250	PAP2 superfamily	PlasmaMembrane	endoplasmic reticulum membrane	5	6	No	Amino Acid/Other	9	Incompletely characterized transport systems	9.B.105.3.2	Lipoprotein Signal Peptidase/Phosphatase/Lead Resistance Fusion Protein (PbrBC) Family	phosphatidate phosphatase activity [GO:0008195]
C4LTC8	EHI_045150	Protein-S-isoprenylcysteine O-methyltransferase (EC 2.1.1.100)	prenyl cysteine carboxyl methyltransferase, putative	221	Isoprenylcysteine carboxyl methyltransferase (ICMT) family	PlasmaMembrane	endoplasmic reticulum membrane	5	4	No	No hits	9	Incompletely characterized transport systems	9.B.115.1.6	Putative Integral Membrane Steroid 5α-reductase (SαR) Family	protein C-terminal S-isoprenylcysteine carboxyl O-methyltransferase activity [GO:0004671]
C4M2P4	EHI_006100	Protein-S-isoprenylcysteine O-methyltransferase (EC 2.1.1.100)	prenyl cysteine carboxyl methyltransferase, putative	246	Isoprenylcysteine carboxyl methyltransferase (ICMT) family	PlasmaMembrane	endoplasmic reticulum membrane	5	6	No	No hits	9	Incompletely characterized transport systems	9.B.115.1.6	Putative Integral Membrane Steroid 5α-reductase (SαR) Family	protein C-terminal S-isoprenylcysteine carboxyl O-methyltransferase activity [GO:0004671]
B1N379	EHI_005110	Uncharacterized protein	hypothetical protein	68	Proteolipid membrane potential modulator	PlasmaMembrane	vacuole membrane	2	2	No	No hits	9	Incompletely characterized transport systems	9.B.12.1.1	Sensitivity to Sodium or Salt Stress-induced Hydrophobic Peptide (Sna) Family
C4LUK3	EHI_022900	Uncharacterized protein	hypothetical protein	68	Proteolipid membrane potential modulator	PlasmaMembrane	vacuole membrane	2	2	No	No hits	9	Incompletely characterized transport systems	9.B.12.1.1	Sensitivity to Sodium or Salt Stress-induced Hydrophobic Peptide (Sna) Family
C4LUX6	EHI_092110	Uncharacterized protein	hypothetical protein	56	Proteolipid membrane potential modulator	PlasmaMembrane	vacuole membrane	2	2	No	No hits	9	Incompletely characterized transport systems	9.B.12.1.3	Sensitivity to Sodium or Salt Stress-induced Hydrophobic Peptide (Sna) Family
C4LUX9	EHI_092140	Protein YIPF	vesicular transport protein Yip1, putative	231	Yip1 domain	PlasmaMembrane	golgi apparatus membrane	5	5	No	Anion/Cation/Sugar/Other	9	Incompletely characterized transport systems	9.B.135.1.2	Membrane Trafficking Yip (Yip) Family
C4LSB8	EHI_153260	Uncharacterized protein	hypothetical protein, conserved	265	YIF1	PlasmaMembrane	endoplasmic reticulum membrane	5	5	No	Anion/Sugar	9	Incompletely characterized transport systems	9.B.135.2.5	Membrane Trafficking Yip (Yip) Family		ER to Golgi vesicle-mediated transport [GO:0006888]
C4LYI9	EHI_093980	Uncharacterized protein	hypothetical protein	231	YIF1	PlasmaMembrane	endoplasmic reticulum membrane	6	6	No	No hits	9	Incompletely characterized transport systems	9.B.135.2.5	Membrane Trafficking Yip (Yip) Family		ER to Golgi vesicle-mediated transport [GO:0006888]
C4LTU7	EHI_050770	Uncharacterized protein	hypothetical protein	441	Wnt-binding factor required for Wnt secretion	PlasmaMembrane	endoplasmic reticulum membrane	8	8	No	No hits	9	Incompletely characterized transport systems	9.B.14.1.11	Putative Heme Handling Protein (HHP) Family
C4LWF9	EHI_096460	F-box domain containing membrane protein, putative	F-box domain containing membrane protein, putative	485	F-box domain	PlasmaMembrane	endoplasmic reticulum membrane	7	8	No	No hits	9	Incompletely characterized transport systems	9.B.14.1.11	Putative Heme Handling Protein (HHP) Family
C4LY48	EHI_177450	Uncharacterized protein	hypothetical protein, conserved	137	Got1/Sft2-like family	PlasmaMembrane	golgi apparatus membrane	3	4	No	Sugar	9	Incompletely characterized transport systems	9.B.14.1.12	Putative Heme Handling Protein (HHP) Family		vesicle-mediated transport [GO:0016192]
C4LZB5	EHI_000640	Vesicle transport protein	hypothetical protein, conserved	163	Got1/Sft2-like family	PlasmaMembrane	golgi apparatus membrane	4	4	No	No hits	9	Incompletely characterized transport systems	9.B.14.1.12	Putative Heme Handling Protein (HHP) Family		protein transport [GO:0015031]; vesicle-mediated transport [GO:0016192]
C4M2D5	EHI_158160	Uncharacterized protein	hypothetical protein	524	Protein kinase domain	PlasmaMembrane	endoplasmic reticulum membrane	7	7	No	No hits	9	Incompletely characterized transport systems	9.B.14.1.12	Putative Heme Handling Protein (HHP) Family	ATP binding [GO:0005524]; protein kinase activity [GO:0004672]
B1N3J2	EHI_059850	Uncharacterized protein	hypothetical protein	280	Transmembrane protein 164	PlasmaMembrane	endoplasmic reticulum membrane	7	6	No	No hits	9	Incompletely characterized transport systems	9.B.14.1.12	Putative Heme Handling Protein (HHP) Family
C4M9H8	EHI_187710	F-box domain containing membrane protein, putative	F-box domain containing membrane protein, putative	467	F-box domain	PlasmaMembrane	endoplasmic reticulum membrane	8	10	No	No hits	9	Incompletely characterized transport systems	9.B.14.1.4	Putative Heme Handling Protein (HHP) Family
C4LWF3	EHI_096400	F-box domain containing membrane protein, putative	F-box domain containing membrane protein, putative	325	F-box domain profile.	PlasmaMembrane	endoplasmic reticulum membrane	5	8	No	No hits	9	Incompletely characterized transport systems	9.B.14.1.4	Putative Heme Handling Protein (HHP) Family
C4M0V3	EHI_100340	F-box domain containing membrane protein, putative	F-box domain containing membrane protein, putative	535	F-box domain profile.	PlasmaMembrane	endoplasmic reticulum membrane	8	8	No	No hits	9	Incompletely characterized transport systems	9.B.14.1.4	Putative Heme Handling Protein (HHP) Family
C4LTV4	EHI_050840	Uncharacterized protein	hypothetical protein	436	Wnt-binding factor required for Wnt secretion	PlasmaMembrane	endoplasmic reticulum membrane	8	8	No	No hits	9	Incompletely characterized transport systems	9.B.14.1.8	Putative Heme Handling Protein (HHP) Family
C4M896	EHI_019090	Uncharacterized protein	hypothetical protein, conserved	352	Protein of unknown function (DUF2838)	PlasmaMembrane	endoplasmic reticulum membrane	8	8	No	No hits	9	Incompletely characterized transport systems	9.B.14.1.8	Putative Heme Handling Protein (HHP) Family
C4M719	EHI_189880	Uncharacterized protein	hypothetical protein	216	UNC-50 family	PlasmaMembrane	golgi apparatus membrane	5	5	No	No hits	9	Incompletely characterized transport systems	9.B.14.1.8	Putative Heme Handling Protein (HHP) Family
C4M0P6	EHI_009800	Phosphatidylserine synthase, putative	phosphatidylserine synthase, putative	442	Phosphatidyl serine synthase	PlasmaMembrane	endoplasmic reticulum membrane	7	9	No	No hits	9	Incompletely characterized transport systems	9.B.14.2.5	Putative Heme Handling Protein (HHP) Family		phosphatidylserine biosynthetic process [GO:0006659]
C4M697	EHI_081700	Uncharacterized protein	hypothetical protein	246	Frag1/DRAM/Sfk1 family	PlasmaMembrane	mitochondrion membrane	6	6	No	No hits	9	Incompletely characterized transport systems	9.B.14.4.2	Putative Heme Handling Protein (HHP) Family
C4LXF6	EHI_130880	Uncharacterized	hypothetical protein	503	Eukaryotic initiation factor 4E	PlasmaMembrane	endoplasmic reticulum membrane	1	0	No	No hits	9	Channel	9.B.14.4.4	Putative Heme Handling Protein (HHP) Family
C4MAN9	EHI_075540	Protein kinase, putative	protein kinase, putative	779	Glycosylphosphatidylinositol-mannosyltransferase I, PIG-X/PBN1	PlasmaMembrane	endoplasmic reticulum membrane	1	1	Yes	No hits	9	Incompletely characterized transport systems	1.I.1.1.3	Eukaryotic Nuclear Pore Complex (E-NPC) Family
C4LU26	EHI_068330	GPI mannosyltransferase 2 (EC 2.4.1.-)	hypothetical protein, conserved	417	Mannosyltransferase (PIG-V))	PlasmaMembrane	endoplasmic reticulum membrane	9	11	No	No hits	9	Incompletely characterized transport systems	9.B.142.11.8	Integral membrane Glycosyltransferase family 39 (GT39) Family	dolichyl-phosphate-mannose-glycolipid alpha-mannosyltransferase activity [GO:0004584]; mannosyltransferase activity [GO:0000030]	GPI anchor biosynthetic process [GO:0006506]
C4LVM0	EHI_103780	Dolichyl-diphosphooligosaccharide--protein glycosyltransferase subunit OST2 (Oligosaccharyl transferase subunit OST2) (EC 2.4.99.18)	defender against cell death protein, putative	118	DAD family	PlasmaMembrane	endoplasmic reticulum membrane	3	3	No	Sugar	9	Incompletely characterized transport systems	9.B.142.3.14	Integral membrane Glycosyltransferase family 39 (GT39) Family	dolichyl-diphosphooligosaccharide-protein glycotransferase activity [GO:0004579]	protein N-linked glycosylation [GO:0006487]
C4LV77	EHI_183010	Dolichyl-diphosphooligosaccharide--protein glycosyltransferase 48 kDa subunit (Oligosaccharyl transferase 48 kDa subunit) (EC 2.4.99.18)	dolichyl-diphosphooligosaccharide-protein glycotransferase, putative	376	Oligosaccharyltransferase 48 kDa subunit beta	PlasmaMembrane	endoplasmic reticulum membrane	1	1	Yes	No hits	9	Incompletely characterized transport systems	9.B.142.3.14	Integral membrane Glycosyltransferase family 39 (GT39) Family	transferase activity, transferring glycosyl groups [GO:0016757]	protein N-linked glycosylation via asparagine [GO:0018279]
C4LWN1	EHI_069430	Dolichyl-diphosphooligosaccharide--protein glycosyltransferase 48 kDa subunit (Oligosaccharyl transferase 48 kDa subunit) (EC 2.4.99.18)	dolichyl-di-phosphooligosaccharide-protein glycotransferase, putative	416	Oligosaccharyltransferase 48 kDa subunit beta	PlasmaMembrane	endoplasmic reticulum membrane	1	1	Yes	Anion/Proteins/mRNA	9	Incompletely characterized transport systems	9.B.142.3.14	Integral membrane Glycosyltransferase family 39 (GT39) Family	transferase activity, transferring glycosyl groups [GO:0016757]	protein N-linked glycosylation via asparagine [GO:0018279]
C4M4V6	EHI_028900	Dolichyl-diphosphooligosaccharide--protein glycosyltransferase 48 kDa subunit (Oligosaccharyl transferase 48 kDa subunit) (EC 2.4.99.18)	dolichyl-diphosphooligosaccharide-protein glycotransferase, putative	416	Oligosaccharyltransferase 48 kDa subunit beta	PlasmaMembrane	endoplasmic reticulum membrane	1	1	Yes	No hits	9	Incompletely characterized transport systems	9.B.142.3.14	Integral membrane Glycosyltransferase family 39 (GT39) Family	transferase activity, transferring glycosyl groups [GO:0016757]	protein N-linked glycosylation via asparagine [GO:0018279]
C4LYH0	EHI_093790	Dolichyl-diphosphooligosaccharide--protein glycosyltransferase subunit 1 (EC 2.4.99.18)	dolychil-diphosphooligosaccharide-- protein glycosyltransferase subunit, putative	423	Ribophorin I	PlasmaMembrane	endoplasmic reticulum membrane	1	1	Yes	No hits	9	Incompletely characterized transport systems	9.B.142.3.14	Rhomboid Protease Family	dolichyl-diphosphooligosaccharide-protein glycotransferase activity [GO:0004579]	protein N-linked glycosylation via asparagine [GO:0018279]
C4M2N3	EHI_005980	Dolichyl-diphosphooligosaccharide--protein glycosyltransferase subunit 1 (EC 2.4.99.18)	hypothetical protein	425	Ribophorin I	PlasmaMembrane	cytoplasm	1	1	No	No hits	9	Incompletely characterized transport systems	9.B.142.3.14	Rhomboid Protease Family	dolichyl-diphosphooligosaccharide-protein glycotransferase activity [GO:0004579]	protein N-linked glycosylation via asparagine [GO:0018279]
C4M718	EHI_190000	Dolichyl-diphosphooligosaccharide--protein glycosyltransferase subunit 1 (EC 2.4.99.18)	dolychil-diphosphooligosaccharide-- protein glycosyltransferase subunit, putative	406	Ribophorin I	PlasmaMembrane	endoplasmic reticulum membrane	1	1	No	No hits	9	Incompletely characterized transport systems	9.B.142.3.14	Rhomboid Protease Family	dolichyl-diphosphooligosaccharide-protein glycotransferase activity [GO:0004579]	protein N-linked glycosylation via asparagine [GO:0018279]
C4M7V5	EHI_029540	Dolichyl-diphosphooligosaccharide--protein glycosyltransferase subunit 1 (EC 2.4.99.18)	dolychil-diphosphooligosaccharide-- protein glycosyltransferase subunit, putative	423	Ribophorin I	PlasmaMembrane	endoplasmic reticulum membrane	1	1	Yes	Anion/Cation	9	Incompletely characterized transport systems	9.B.142.3.14	Rhomboid Protease Family	dolichyl-diphosphooligosaccharide-protein glycotransferase activity [GO:0004579]	protein N-linked glycosylation via asparagine [GO:0018279]
B1N2H8	EHI_045470	Dolichyl-diphosphooligosaccharide--protein	dolychil-diphosphooligosaccharide-- protein glycosyltransferase subunit, putative	398	Ribophorin I	Nuclear	endoplasmic reticulum membrane	1	1	No	No hits	9	Incompletely characterized transport systems	9.B.142.3.14	Integral membrane Glycosyltransferase family 39 (GT39) Family
B1N615	EHI_042580	Dolychil-diphosphooligosaccharide--protein glycosyltransferase subunit, putative (Fragment)	dolychil-diphosphooligosaccharide-- protein glycosyltransferase subunit, putative	160	Oligosaccharyl transferase STT3 subunit	PlasmaMembrane	endoplasmic reticulum membrane	4	4	No	Anion/Other	9	Incompletely characterized transport systems	9.B.142.3.3	Integral membrane Glycosyltransferase family 39 (GT39) Family	oligosaccharyl transferase activity [GO:0004576]	protein glycosylation [GO:0006486]
C4LTI8	EHI_011940	Dolichyl-diphosphooligosaccharide--protein glycosyltransferase subunit STT3A, putative	dolichyl-diphosphooligosaccharide--protein glycosyltransferase subunit STT3A, putative	721	Oligosaccharyl transferase STT3 subunit	PlasmaMembrane	endoplasmic reticulum membrane	13	13	No	No hits	9	Incompletely characterized transport systems	9.B.142.3.3	Integral membrane Glycosyltransferase family 39 (GT39) Family	dolichyl-diphosphooligosaccharide-protein glycotransferase activity [GO:0004579]	post-translational protein modification [GO:0043687]; protein N-linked glycosylation via asparagine [GO:0018279]
C4LYN6	EHI_118880	Oligosaccharyl transferase, putative	Oligosaccharyl transferase, putative	710	Oligosaccharyl transferase STT3 subunit	PlasmaMembrane	endoplasmic reticulum membrane	13	13	No	Anion/Other	9	Incompletely characterized transport systems	9.B.142.3.3	Integral membrane Glycosyltransferase family 39 (GT39) Family	dolichyl-diphosphooligosaccharide-protein glycotransferase activity [GO:0004579]	post-translational protein modification [GO:0043687]; protein N-linked glycosylation via asparagine [GO:0018279]
B1N575	EHI_160010	Uncharacterized protein (Fragment)	hypothetical protein, conserved	218	Protein of unknown function (DUF2838)	PlasmaMembrane	endoplasmic reticulum membrane	6	6	No	No hits	9	Incompletely characterized transport systems	9.B.142.9.13	Integral membrane Glycosyltransferase family 39 (GT39) Family
C4LTW5	EHI_050950	Uncharacterized protein	hypothetical protein, conserved	345	Protein of unknown function (DUF2838)	PlasmaMembrane	endoplasmic reticulum membrane	8	8	No	No hits	9	Incompletely characterized transport systems	9.B.142.9.13	Integral membrane Glycosyltransferase family 39 (GT39) Family
C4M1Q8	EHI_062840	UDP-N-acetylglucosamine--dolichyl-phosphate N-acetylglucosaminephosphotransferase, putative	UDP-N-acetylglucosamine--dolichyl-phosphate N-acetylglucosaminephosphotransferase, putative	365	Glycosyl transferase family 4	PlasmaMembrane	endoplasmic reticulum membrane	10	11	No	Cation	9	Incompletely characterized transport systems	9.B.146.1.5	Putative Undecaprenyl-phosphate N-Acetylglucosaminyl Transferase (MurG) Family	phospho-N-acetylmuramoyl-pentapeptide-transferase activity [GO:0008963]; UDP-N-acetylglucosamine-dolichyl-phosphate N-acetylglucosaminephosphotransferase activity [GO:0003975]	dolichyl diphosphate biosynthetic process [GO:0006489]; protein N-linked glycosylation [GO:0006487]
C4LVV7	EHI_125700	dTDP-D-glucose	dTDP-D-glucose 4,6-dehydratase, putative	342	NAD dependent epimerase/dehydratase family	Cytoplasmic	golgi apparatus membrane	1	0	No	Anion/Electron	9	Incompletely characterized transport systems	9.B.18.2.1	Xanthan Glycosyl Transferase, GumD (GumD) Family
C4M255	EHI_174070	dTDP-D-glucose	dTDP-D-glucose 4,6-dehydratase, putative	341	NAD dependent epimerase/dehydratase family	Cytoplasmic	golgi apparatus membrane	1	0	No	Anion/Electron	9	Incompletely characterized transport systems	9.B.18.2.1	Xanthan Glycosyl Transferase, GumD (GumD) Family
C4LXK1	EHI_073360	Uncharacterized protein	hypothetical protein, conserved	227	YhhN-like protein	PlasmaMembrane	endoplasmic reticulum membrane	7	8	No	No hits	9	Incompletely characterized transport systems	9.B.183.1.4	Wzy Glycosyltransferase (EpsG) Family
Q1EQ41	EHI_023070	EhEmp24C	hypothetical protein, conserved	216	emp24/gp25L/p24 family/GOLD	Cytoplasmic	endoplasmic reticulum membrane	1	1	Yes	Cation	9	Incompletely characterized transport systems	9.B.188.1.1	Transmembrane Emp24 Domain-containing Protein (TMED) Family
C4LU54	EHI_068640	Alpha/beta hydrolase fold protein, putative	alpha/beta hydrolase fold protein, putative	404	emp24/gp25L/p24 family/GOLD	PlasmaMembrane	secreted	1	1	Yes	Anion/Cation/Electron	9	Incompletely characterized transport systems	9.B.188.1.2	Transmembrane Emp24 Domain-containing Protein (TMED) Family
C4LWD8	EHI_096250	Uncharacterized protein	hypothetical protein	622	emp24/gp25L/p24 family/GOLD	PlasmaMembrane	endoplasmic reticulum membrane	1	1	Yes	No hits	9	Incompletely characterized transport systems	9.B.188.1.2	Transmembrane Emp24 Domain-containing Protein (TMED) Family
Q1EQ42	EHI_096210	Coated vesicle membrane protein, putative (EhEmp24B)	Coated vesicle membrane protein, putative	194	Translocon-associated protein beta (TRAPB)	PlasmaMembrane	golgi apparatus membrane	1	1	Yes	Cation/Proteins/MRNA	9	Incompletely characterized transport systems	9.B.188.1.2	Transmembrane Emp24 Domain-containing Protein (TMED) Family
C4M7K4	EHI_170470	ER lumen protein-retaining receptor	ER lumen protein retaining receptor	214	ER lumen protein retaining receptor	PlasmaMembrane	endoplasmic reticulum membrane	6	7	No	No hits	9	Incompletely characterized transport systems	9.B.191.1.5	Endoplasmic Reticulum Retention Receptor (KDELR) Family	ER retention sequence binding [GO:0046923]	protein retention in ER lumen [GO:0006621]; protein transport [GO:0015031]
C4M735	EHI_183560	CAAX amino terminal protease family	CAAX amino terminal protease family	320	CAAX protease self-immunity	PlasmaMembrane	golgi apparatus membrane	8	7	No	No hits	9	Incompletely characterized transport systems	9.B.2.1.22	Integral Membrane CAAX Protease-2 (CAAX Protease2) Family	peptidase activity [GO:0008233]
C4LZT2	EHI_194060	CAAX amino terminal protease family	CAAX amino terminal protease family	229	CAAX protease self-immunity	PlasmaMembrane	endoplasmic reticulum membrane	5	6	No	No hits	9	Incompletely characterized transport systems	9.B.2.1.23	Integral Membrane CAAX Protease-2 (CAAX Protease2) Family	peptidase activity [GO:0008233]
C4LZW9	EHI_194580	CAAX amino terminal protease family	CAAX amino terminal protease family	283	CAAX protease self-immunity	PlasmaMembrane	mitochondrion membrane	6	7	No	No hits	9	Incompletely characterized transport systems	9.B.2.1.23	Integral Membrane CAAX Protease-2 (CAAX Protease2) Family	peptidase activity [GO:0008233]
B1N4S7	EHI_191790	Uncharacterized protein	hypothetical protein	223	FAR-17a/AIG1-like protein	PlasmaMembrane	endoplasmic reticulum membrane	4	4	No	No hits	9	Incompletely characterized transport systems	9.B.203.1.2	AIG1 Lipid Hydrolase (AIG1) Family
C4LVH7	EHI_103330	Mannosyltransferase, putative	mannosyltransferase, putative	384	Mannosyltransferase (PIG-M)	PlasmaMembrane	endoplasmic reticulum membrane	9	10	No	No hits	9	Incompletely characterized transport systems	9.B.225.1.7	Mannosyl Transferase (MptB) Family	transferase activity, transferring hexosyl groups [GO:0016758]	GPI anchor biosynthetic process [GO:0006506]
C4M7V9	EHI_029580	Mannosyltransferase, putative	mannosyltransferase, putative	412	Mannosyltransferase (PIG-M)	PlasmaMembrane	endoplasmic reticulum membrane	9	10	No	No hits	9	Incompletely characterized transport systems	9.B.225.1.7	Mannosyl Transferase (MptB) Family	transferase activity, transferring hexosyl groups [GO:0016758]	GPI anchor biosynthetic process [GO:0006506]
C4M3J9	EHI_109690	Uncharacterized protein	hypothetical protein, conserved	391	Protein of unknown function (DUF2838)	PlasmaMembrane	endoplasmic reticulum membrane	6	8	No	No hits	9	Incompletely characterized transport systems	9.B.225.1.7	Mannosyl Transferase (MptB) Family
C4LWE5	EHI_096320	Uncharacterized protein	hypothetical protein	219	Mannose-6-phosphate receptor	PlasmaMembrane	endoplasmic reticulum membrane	1	1	Yes	Cation	9	Incompletely characterized transport systems	9.B.247.1.3	Mannose 6-Phosphate Receptor (M6PR) Family
C4LWG5	EHI_096530	Uncharacterized protein	hypothetical protein	267	Mannose-6-phosphate receptor binding domain	PlasmaMembrane	endoplasmic reticulum membrane	1	1	Yes	No hits	9	Incompletely characterized transport systems	9.B.247.1.7	Mannose 6-Phosphate Receptor (M6PR) Family
C4LU48	EHI_068570	Uncharacterized protein	hypothetical protein	159	Protein of unknown function (DUF788)	PlasmaMembrane	endoplasmic reticulum membrane	3	4	No	Sugar	9	Incompletely characterized transport systems	9.B.26.1.2	Regulator of ER Stress and Autophagy TMEM208 (TMEM208) Family		vacuolar protein processing [GO:0006624]
C4LSB5	EHI_153230	Uncharacterized protein	hypothetical protein	464	Lung seven transmembrane receptor-like	PlasmaMembrane	endoplasmic reticulum membrane	8	7	No	No hits	9	Incompletely characterized transport systems	9.B.266.1.3	Uncharacterized Bacterial Protein-12 (UBP12) Family		G-protein coupled receptor signaling pathway [GO:0007186]; response to pheromone [GO:0019236]
C4MAR9	EHI_049010	Uncharacterized protein	hypothetical protein	268	SNARE associated Golgi protein	PlasmaMembrane	golgi apparatus membrane	6	7	No	Anion/Cation	9	Incompletely characterized transport systems	9.B.27.1.1	DedA or YdjX-Z (DedA) Family
C4M9U1	EHI_108350	Hypothetical transmembrane protein	hypothetical transmembrane protein	258	SNARE associated Golgi protein	PlasmaMembrane	golgi apparatus membrane	5	7	No	Anion/Cation	9	Incompletely characterized transport systems	9.B.27.5.1	DedA or YdjX-Z (DedA) Family
C4LYA6	EHI_167040	Uncharacterized protein	hypothetical protein, conserved	264	SNARE associated Golgi protein	PlasmaMembrane	endoplasmic reticulum membrane	6	7	No	Cation	9	Incompletely characterized transport systems	9.B.27.5.3	DedA or YdjX-Z (DedA) Family
C4M2J4	EHI_054750	Phosphatidate cytidylyltransferase, putative	phosphatidate cytidylyltransferase, putative	295	Cytidylyltransferase family	PlasmaMembrane	endoplasmic reticulum membrane	6	9	No	No hits	9	Incompletely characterized transport systems	9.B.273.1.2	Phosphatidate Cytidylyltransferase (PCT) Family	phosphatidate cytidylyltransferase activity [GO:0004605]	CDP-diacylglycerol biosynthetic process [GO:0016024]; phosphatidylglycerol biosynthetic process [GO:0006655]
B1N3Z7	EHI_173180	Coatomer subunit beta, putative	coatomer subunit beta, putative	406	Adaptin N terminal region	PlasmaMembrane	nucleus	1	1	No	Anion/Cation/Proteins/mRNA	9	Incompletely characterized transport systems	9.B.278.1.1	Organellar-targeting Adaptor Protein Complex (O-APC) Family		ER to Golgi vesicle-mediated transport [GO:0006888]; intracellular protein transport [GO:0006886]; intra-Golgi vesicle-mediated transport [GO:0006891]; retrograde vesicle-mediated transport, Golgi to ER [GO:0006890]
C4LU25	EHI_068320	Glycerophosphoryl diester phosphodiesterase, putative	glycerophosphoryl diester phosphodiesterase, putative	396	Glycerophosphoryl diester phosphodiesterase family	PlasmaMembrane	mitochondrion membrane	2	1	No	Anion/Other	9	Incompletely characterized transport systems	9.B.28.5.1	Putative Essential Component of the MusEFGKI ABC Transporter, MusI (MusI) Family	glycerophosphodiester phosphodiesterase activity [GO:0008889]	lipid metabolic process [GO:0006629]
C4M346	EHI_059880	Glycerophosphoryl diester phosphodiesterase, putative	glycerophosphoryl diester phosphodiesterase, putative	386	Glycerophosphoryl diester phosphodiesterase family	PlasmaMembrane	mitochondrion membrane	2	2	No	Anion/Cation/Electron	9	Incompletely characterized transport systems	9.B.28.5.1	Putative Essential Component of the MusEFGKI ABC Transporter, MusI (MusI) Family	glycerophosphodiester phosphodiesterase activity [GO:0008889]	lipid metabolic process [GO:0006629]
C4M8W3	EHI_113970	Glycerophosphoryl diester phosphodiesterase, putative	glycerophosphoryl diester phosphodiesterase, putative	380	Glycerophosphoryl diester phosphodiesterase family	PlasmaMembrane	mitochondrion membrane	2	2	Yes	Anion	9	Incompletely characterized transport systems	9.B.28.5.1	Putative Essential Component of the MusEFGKI ABC Transporter, MusI (MusI) Family	glycerophosphodiester phosphodiesterase activity [GO:0008889]	lipid metabolic process [GO:0006629]
C4LTM7	EHI_012340	Uncharacterized protein	hypothetical protein	883	Bacterial pre-peptidase C-terminal domain	PlasmaMembrane	secreted	1	1	No	No hits	9	Incompletely characterized transport systems	9.B.3.1.1	Cysteine Protease Binding Protein-8 (CPB8) Family
C4LXJ0	EHI_131240	Palmitoyltransferase (EC 2.3.1.225)	hypothetical protein, conserved domain containing	330	DHHC palmitoyltransferase	PlasmaMembrane	endoplasmic reticulum membrane	5	5	Yes	No hits	9	Incompletely characterized transport systems	9.B.37.2.1	Huntington-interacting Protein 14 (HIP14) Family	protein-cysteine S-palmitoyltransferase activity [GO:0019706]
C4M1V5	EHI_027690	Palmitoyltransferase (EC 2.3.1.225)	hypothetical protein, conserved domain containing	310	DHHC palmitoyltransferase	PlasmaMembrane	golgi apparatus membrane	4	4	No	Anion	9	Incompletely characterized transport systems	9.B.37.2.1	Huntington-interacting Protein 14 (HIP14) Family	protein-cysteine S-palmitoyltransferase activity [GO:0019706]
C4M4X7	EHI_119280	Palmitoyltransferase (EC 2.3.1.225)	hypothetical protein, conserved domain containing	352	DHHC palmitoyltransferase	PlasmaMembrane	endoplasmic reticulum membrane	6	5	No	No hits	9	Incompletely characterized transport systems	9.B.37.2.1	Huntington-interacting Protein 14 (HIP14) Family	protein-cysteine S-palmitoyltransferase activity [GO:0019706]
C4M696	EHI_081800	Palmitoyltransferase (EC 2.3.1.225)	hypothetical protein, conserved domain containing	314	DHHC palmitoyltransferase	PlasmaMembrane	golgi apparatus membrane	5	4	No	No hits	9	Incompletely characterized transport systems	9.B.37.2.1	Huntington-interacting Protein 14 (HIP14) Family	protein-cysteine S-palmitoyltransferase activity [GO:0019706]
C4LT07	EHI_148370	Palmitoyltransferase (EC 2.3.1.225)	hypothetical protein, conserved domain containing	282	DHHC palmitoyltransferase	PlasmaMembrane	vacuole membrane	4	4	No	No hits	9	Incompletely characterized transport systems	9.B.37.2.2	Huntington-interacting Protein 14 (HIP14) Family	protein-cysteine S-palmitoyltransferase activity [GO:0019706]
C4LW58	EHI_142130	Palmitoyltransferase (EC 2.3.1.225)	hypothetical protein, conserved domain containing	271	DHHC palmitoyltransferase	PlasmaMembrane	endoplasmic reticulum membrane	4	4	No	No hits	9	Incompletely characterized transport systems	9.B.37.2.2	Huntington-interacting Protein 14 (HIP14) Family	protein-cysteine S-palmitoyltransferase activity [GO:0019706]
C4M026	EHI_134770	Palmitoyltransferase (EC 2.3.1.225)	hypothetical protein, conserved domain containing	216	DHHC palmitoyltransferase	PlasmaMembrane	endoplasmic reticulum membrane	2	2	No	No hits	9	Incompletely characterized transport systems	9.B.37.2.2	Huntington-interacting Protein 14 (HIP14) Family	protein-cysteine S-palmitoyltransferase activity [GO:0019706]
C4M092	EHI_004980	Palmitoyltransferase (EC 2.3.1.225)	hypothetical protein, conserved domain containing	275	DHHC palmitoyltransferase	PlasmaMembrane	endoplasmic reticulum membrane	4	4	No	No hits	9	Incompletely characterized transport systems	9.B.37.2.2	Huntington-interacting Protein 14 (HIP14) Family	protein-cysteine S-palmitoyltransferase activity [GO:0019706]
C4M0L9	EHI_008430	Palmitoyltransferase (EC 2.3.1.225)	hypothetical protein, conserved domain containing	258	DHHC palmitoyltransferase	PlasmaMembrane	endoplasmic reticulum membrane	4	4	No	No hits	9	Incompletely characterized transport systems	9.B.37.2.2	Huntington-interacting Protein 14 (HIP14) Family	protein-cysteine S-palmitoyltransferase activity [GO:0019706]
C4M2I1	EHI_054500	Palmitoyltransferase (EC 2.3.1.225)	hypothetical protein, conserved domain containing	225	DHHC palmitoyltransferase	PlasmaMembrane	vacuole membrane	2	2	No	No hits	9	Incompletely characterized transport systems	9.B.37.2.2	Huntington-interacting Protein 14 (HIP14) Family	protein-cysteine S-palmitoyltransferase activity [GO:0019706]
C4M319	EHI_025320	Palmitoyltransferase (EC 2.3.1.225)	hypothetical protein, conserved domain containing	293	DHHC palmitoyltransferase	PlasmaMembrane	endoplasmic reticulum membrane	4	4	No	No hits	9	Incompletely characterized transport systems	9.B.37.2.2	Huntington-interacting Protein 14 (HIP14) Family	protein-cysteine S-palmitoyltransferase activity [GO:0019706]
C4M7C1	EHI_007270	Palmitoyltransferase (EC 2.3.1.225)	hypothetical protein, conserved domain containing	309	DHHC palmitoyltransferase	PlasmaMembrane	endoplasmic reticulum membrane	4	4	No	No hits	9	Incompletely characterized transport systems	9.B.37.2.2	Huntington-interacting Protein 14 (HIP14) Family	protein-cysteine S-palmitoyltransferase activity [GO:0019706]
C4M7K1	EHI_170440	Palmitoyltransferase (EC 2.3.1.225)	hypothetical protein, conserved domain containing	263	DHHC palmitoyltransferase	PlasmaMembrane	endoplasmic reticulum membrane	4	4	No	No hits	9	Incompletely characterized transport systems	9.B.37.2.2	Huntington-interacting Protein 14 (HIP14) Family	protein-cysteine S-palmitoyltransferase activity [GO:0019706]
C4M7W8	EHI_047770	Palmitoyltransferase (EC 2.3.1.225)	hypothetical protein, conserved domain containing	296	DHHC palmitoyltransferase	PlasmaMembrane	endoplasmic reticulum membrane	4	4	No	No hits	9	Incompletely characterized transport systems	9.B.37.2.2	Huntington-interacting Protein 14 (HIP14) Family	protein-cysteine S-palmitoyltransferase activity [GO:0019706]
B1N5H0	EHI_048840	Palmitoyltransferase (EC 2.3.1.225) (Fragment)	hypothetical protein, conserved domain containing	217	DHHC palmitoyltransferase	PlasmaMembrane	endoplasmic reticulum membrane	3	3	No	No hits	9	Incompletely characterized transport systems	9.B.37.2.3	Huntington-interacting Protein 14 (HIP14) Family	protein-cysteine S-palmitoyltransferase activity [GO:0019706]
B1N5J3	EHI_037820	Palmitoyltransferase (EC 2.3.1.225)	hypothetical protein, conserved domain containing	335	DHHC palmitoyltransferase	PlasmaMembrane	endoplasmic reticulum membrane	4	4	No	No hits	9	Incompletely characterized transport systems	9.B.37.2.3	Huntington-interacting Protein 14 (HIP14) Family	protein-cysteine S-palmitoyltransferase activity [GO:0019706]
C4LUI4	EHI_049860	Palmitoyltransferase (EC 2.3.1.225)	hypothetical protein, conserved domain containing	305	DHHC palmitoyltransferase	PlasmaMembrane	endoplasmic reticulum membrane	4	4	No	No hits	9	Incompletely characterized transport systems	9.B.37.2.3	Huntington-interacting Protein 14 (HIP14) Family	protein-cysteine S-palmitoyltransferase activity [GO:0019706]
C4LWQ2	EHI_198560	Palmitoyltransferase (EC 2.3.1.225)	hypothetical protein, conserved domain containing	324	DHHC palmitoyltransferase	PlasmaMembrane	endoplasmic reticulum membrane	5	4	No	No hits	9	Incompletely characterized transport systems	9.B.37.2.3	Huntington-interacting Protein 14 (HIP14) Family	protein-cysteine S-palmitoyltransferase activity [GO:0019706]
C4LXL9	EHI_073590	Palmitoyltransferase (EC 2.3.1.225)	hypothetical protein, conserved domain containing	318	DHHC palmitoyltransferase	PlasmaMembrane	endoplasmic reticulum membrane	4	4	No	No hits	9	Incompletely characterized transport systems	9.B.37.2.3	Huntington-interacting Protein 14 (HIP14) Family	protein-cysteine S-palmitoyltransferase activity [GO:0019706]
C4M135	EHI_105310	Palmitoyltransferase (EC 2.3.1.225)	hypothetical protein, conserved domain containing	198	DHHC palmitoyltransferase	PlasmaMembrane	endoplasmic reticulum membrane	2	2	No	No hits	9	Incompletely characterized transport systems	9.B.37.2.3	Huntington-interacting Protein 14 (HIP14) Family	protein-cysteine S-palmitoyltransferase activity [GO:0019706]
C4M1B8	EHI_169960	Palmitoyltransferase (EC 2.3.1.225)	hypothetical protein, conserved domain containing	271	DHHC palmitoyltransferase	PlasmaMembrane	endoplasmic reticulum membrane	4	4	No	No hits	9	Incompletely characterized transport systems	9.B.37.2.3	Huntington-interacting Protein 14 (HIP14) Family	protein-cysteine S-palmitoyltransferase activity [GO:0019706]
C4M3W4	EHI_016420	Palmitoyltransferase (EC 2.3.1.225)	hypothetical protein, conserved domain containing	269	DHHC palmitoyltransferase	PlasmaMembrane	golgi apparatus membrane	4	4	No	No hits	9	Incompletely characterized transport systems	9.B.37.2.3	Huntington-interacting Protein 14 (HIP14) Family	protein-cysteine S-palmitoyltransferase activity [GO:0019706]
C4M852	EHI_052120	Palmitoyltransferase (EC 2.3.1.225)	hypothetical protein, conserved domain containing	335	DHHC palmitoyltransferase	PlasmaMembrane	endoplasmic reticulum membrane	4	4	No	No hits	9	Incompletely characterized transport systems	9.B.37.2.3	Huntington-interacting Protein 14 (HIP14) Family	protein-cysteine S-palmitoyltransferase activity [GO:0019706]
C4M6Z0	EHI_056400	Uncharacterized protein	hypothetical protein	459	Wnt-binding factor required for Wnt secretion	PlasmaMembrane	endoplasmic reticulum membrane	7	8	No	No hits	9	Incompletely characterized transport systems	9.B.72.2.5	4 TMS GlpM (GlpM) Family
C4M1N3	EHI_062460	Protein RER1	RER1 protein, putative	174	Rer1 family	PlasmaMembrane	golgi apparatus membrane	3	4	No	No hits	9	Incompletely characterized transport systems	9.B.82.1.1	Endoplasmic Reticulum Retrieval Protein1 (Putative Heavy Metal Transporter) (Rer1) Family		retrograde vesicle-mediated transport, Golgi to ER [GO:0006890]
B1N3B3	EHI_030860	Cysteine surface protein, putative	cysteine surface protein, putative	428	Growth factor receptor cysteine-rich domain superfamily	Extracellular	plasma membrane	1	1	No	No hits	9	Incompletely characterized transport systems	9.B.87.1.1	Selenoprotein P Receptor (SelP-Receptor) Family
B1N4T5	EHI_160750	Cysteine surface protein, putative	cysteine surface protein, putative	560	Growth factor receptor cysteine-rich domain superfamily	Nuclear	plasma membrane	1	1	No	No hits	9	Incompletely characterized transport systems	9.B.87.1.14	Selenoprotein P Receptor (SelP-Receptor) Family
C4LTT5	EHI_050650	Protein kinase, putative	protein kinase, putative	1880	Tyrosine-protein kinase ephrin type A/B receptor-like	Extracellular	plasma membrane	2	1	Yes	No hits	9	Incompletely characterized transport systems	9.B.87.1.2	Selenoprotein P Receptor (SelP-Receptor) Family
C4LWK1	EHI_069120	N-acetylglucosaminyl transferase, putative	N-acetylglucosaminyl transferase, putative	324	N-acetylglucosaminyl transferase component (Gpi1)	PlasmaMembrane	endoplasmic reticulum membrane	6	6	No	No hits	9	Incompletely characterized transport systems	9.B.146	Putative Undecaprenyl-phosphate N-Acetylglucosaminyl Transferase (MurG) Family	phosphatidylinositol N-acetylglucosaminyltransferase activity [GO:0017176]	GPI anchor biosynthetic process [GO:0006506]
C4LUA6	EHI_110570	Protein tyrosine phosphatase, putative	protein tyrosine phosphatase, putative	218	Protein tyrosine phosphatase-like protein, PTPLA	PlasmaMembrane	endoplasmic reticulum membrane	4	6	No	No hits	9	Incompletely characterized transport systems	9.B.97.8.1	Acyltransferase-3/Putative Acetyl-CoA Transporter (ATAT) Family	3-hydroxyacyl-CoA dehydratase activity [GO:0018812]	fatty acid elongation [GO:0030497]; sphingolipid biosynthetic process [GO:0030148]; very long-chain fatty acid biosynthetic process [GO:0042761]
C4M045	EHI_021300	Lecithin:cholesterol acyltransferase domain-containing protein	lecithin:cholesterol acyltransferase domain-containing protein	395	Serine/Threonine protein kinases, catalytic domain	PlasmaMembrane	endoplasmic reticulum membrane	1	1	Yes	No hits	No hits
C4LYE2	EHI_008070	Molybdenum cofactor sulfurase, putative	molybdenum cofactor sulfurase, putative	484	Aminotransferase class-V	PlasmaMembrane	mitochondrion	1	1	No	Anion/Electron	No hits				catalytic activity [GO:0003824]
C4LWW9	EHI_126930	Serine/threonine protein phosphatase type 5, putative	serine/threonine protein phosphatase type 5, putative	388	Calcineurin-like phosphoesterase	PlasmaMembrane	nucleus	3	2	No	No hits	No hits				hydrolase activity [GO:0016787]
C4M0G5	EHI_006920	Papain family cysteine protease domain containing protein	papain family cysteine protease domain containing protein	571	Papain-like cysteine peptidase	PlasmaMembrane	secreted	1	1	No	No hits	No hits				cysteine-type peptidase activity [GO:0008234]
C4M0X6	EHI_015380	Immuno-dominant variable surface antigen	immuno-dominant variable surface antigen	1113	Galactose-binding-like domain superfamily	PlasmaMembrane	cytoplasm	1	1	No	No hits	No hits
C4M1P1	EHI_062550	Uncharacterized protein	hypothetical protein	441	Serine/threonine phosphatases, family 2C, catalytic domain	PlasmaMembrane	nucleus	1	0	No	No hits	No hits				catalytic activity [GO:0003824]
C4M655	EHI_042870	Cell surface protease gp63, putative	cell surface protease gp63, putative	662	Leishmanolysin	PlasmaMembrane	cytoplasm	1	1	Yes	Anion/Cation	No hits				metalloendopeptidase activity [GO:0004222]	cell adhesion [GO:0007155]
C4M2F0	EHI_158310	Uncharacterized protein	hypothetical protein, conserved	311	short chain dehydrogenase	PlasmaMembrane	endoplasmic reticulum membrane	1	2	No	No hits	No hits				oxidoreductase activity [GO:0016491]
C4M3T5	EHI_163540	B-keto acyl reductase, putative	estradiol 17-beta-dehydrogenase, putative	319	short chain dehydrogenase	PlasmaMembrane	endoplasmic reticulum membrane	1	1	No	Anion/Electron	No hits
C4LTB6	EHI_045010	Uncharacterized protein	hypothetical protein, conserved	188	Protein of unknown function (DUF778)	PlasmaMembrane	endoplasmic reticulum membrane	1	3	No	No hits	No hits
C4M0S8	EHI_010140	DNA primase	DNA primase small subunit, putative	372	PAP/25A-associated	PlasmaMembrane	nucleus	1	0	No	No hits	No hits
Q1EQ43	EHI_058320	EhEmp24A	transmembrane protein tmp21, putative	208	Tetratricopeptide-like helical domain superfamily	PlasmaMembrane	endoplasmic reticulum membrane	1	1	Yes	Anion/Cation/Proteins/mRNA	No hits
Q1EQ40	EHI_038590	EhEmp24D	hypothetical protein	193	Immunoglobulin E-set	PlasmaMembrane	endoplasmic reticulum membrane	1	0	Yes	Anion/Cation	No hits
C4LZ13	EHI_009250	Vesicular integral membrane protein VIP36, putative	Legume-like lectin family protein, membrane-bound	414	Lecithin:cholesterol/phospholipid:diacylglycerol acyltransferase	PlasmaMembrane	golgi apparatus membrane	1	0	Yes	No hits	No hits
C4M944	EHI_083600	Uncharacterized	hypothetical protein	212	Uncharacterised conserved protein (DUF2305)	PlasmaMembrane	secreted	1	0	No	Cation	No hits
C4LUW8	EHI_179060	Uncharacterized protein	hypothetical protein	683	Protein of unknown function (DUF3184)	Cytoplasmic	golgi apparatus membrane	1	0	No	No hits	No hits
C4LSB2	EHI_153200	Uncharacterized protein	hypothetical protein, conserved	315	Endoplasmic reticulum vesicle transporter	PlasmaMembrane	endoplasmic reticulum membrane	2	2	No	Anion	No Significant hits
C4LV74	EHI_182970	Uncharacterized protein	hypothetical protein, conserved	361	Endoplasmic reticulum vesicle transporter	PlasmaMembrane	secreted	2	2	No	Anion/Cation	No Significant hits
C4LYJ5	EHI_094080	Leucine rich repeat protein, BspA family	leucine rich repeat protein, BspA family	844	Leucine rich repeats (6 copies)	PlasmaMembrane	chloroplast	1	1	Yes	No hits	No Significant hits
C4LUR1	EHI_178450	Uncharacterized protein	hypothetical protein	626	Intramolecular chaperone auto-processing domain	PlasmaMembrane	endoplasmic reticulum membrane	5	5	No	No hits	No Significant hits				nucleic acid binding [GO:0003676]
C4M8P7	EHI_053610	Apyrase, putative	apyrase, putative	352	Apyrase	PlasmaMembrane	cytoplasm	1	1	No	No hits	No Significant hits				calcium ion binding [GO:0005509]; guanosine-diphosphatase activity [GO:0004382]; uridine-diphosphatase activity [GO:0045134]	proteoglycan biosynthetic process [GO:0030166]
C4M2I5	EHI_054660	Apyrase, putative	apyrase, putative	362	Apyrase	PlasmaMembrane	cytoplasm	1	1	No	No hits	No Significant hits				calcium ion binding [GO:0005509]; guanosine-diphosphatase activity [GO:0004382]; uridine-diphosphatase activity [GO:0045134]	proteoglycan biosynthetic process [GO:0030166]
C4M9M8	EHI_112890	Apyrase, putative	apyrase, putative	367	Apyrase	PlasmaMembrane	cytoplasm	1	1	No	No hits	No Significant hits				calcium ion binding [GO:0005509]; guanosine-diphosphatase activity [GO:0004382]; uridine-diphosphatase activity [GO:0045134]	proteoglycan biosynthetic process [GO:0030166]
C4M666	EHI_042980	Initiation factor eIF-2B delta subunit, putative	Initiation factor eIF-2B delta subunit, putative	510	Initiation factor 2 subunit family	PlasmaMembrane	chloroplast	2	2	No	Anion/Proteins/mRNA	No Significant hits				translation initiation factor activity [GO:0003743]
C4M0C0	EHI_064510	Uncharacterized protein	hypothetical protein	524	Intramolecular chaperone auto-processing domain	PlasmaMembrane	endoplasmic reticulum membrane	5	5	No	No hits	No Significant hits
C4M130	EHI_105260	Uncharacterized protein	hypothetical protein	675	Major facilitator superfamily domain	PlasmaMembrane	nucleus	5	5	No	No hits	No Significant hits
C4M136	EHI_105320	Uncharacterized protein	hypothetical protein	678	Major facilitator superfamily domain	PlasmaMembrane	plasma membrane	5	5	No	No hits	No Significant hits
C4M1W5	EHI_027790	Uncharacterized protein	hypothetical protein	632	Major facilitator superfamily domain	PlasmaMembrane	endoplasmic reticulum membrane	5	5	No	No hits	No Significant hits
C4M950	EHI_083660	Uncharacterized protein	hypothetical protein	698	Major facilitator superfamily domain	PlasmaMembrane	endoplasmic reticulum membrane	5	5	No	No hits	No Significant hits
C4M8Y5	EHI_086370	Hydrolase, alpha/beta fold family domain containing protein	hydrolase, alpha/beta fold family domain containing protein	277	Alpha/beta hydrolase family	PlasmaMembrane	mitochondrion	2	0	No	Amino Acid	No Significant hits				lipase activity [GO:0016298]	lipid metabolic process [GO:0006629]
C4MA88	EHI_039840	Hydrolase, alpha/beta fold family domain containing protein	hydrolase, alpha/beta fold family domain containing protein	276	Alpha/beta hydrolase family	PlasmaMembrane	mitochondrion	1	0	No	No hits	No Significant hits				lipase activity [GO:0016298]	lipid metabolic process [GO:0006629]
B1N3J9	EHI_095910	Uncharacterized protein	hypothetical protein	710	Alpha/beta hydrolase family	PlasmaMembrane	golgi apparatus membrane	5	6	No	No hits	No Significant hits					lipid metabolic process [GO:0006629]
C4LUD4	EHI_049320	Uncharacterized protein	hypothetical protein	722	Alpha/beta hydrolase family	PlasmaMembrane	endoplasmic reticulum membrane	7	8	No	No hits	No Significant hits					lipid metabolic process [GO:0006629]
C4MA37	EHI_180940	Uncharacterized protein	hypothetical protein	689	Alpha/beta hydrolase family	PlasmaMembrane	endoplasmic reticulum membrane	8	8	No	Cation/Other	No Significant hits
C4MAW4	EHI_077750	Uncharacterized protein	hypothetical protein	823	Alpha/beta hydrolase family	PlasmaMembrane	golgi apparatus membrane	7	7	No	Anion/Cation	No Significant hits					lipid metabolic process [GO:0006629]
C4MB54	EHI_198210	Uncharacterized protein	hypothetical protein	586	Alpha/beta hydrolase family	PlasmaMembrane	golgi apparatus membrane	5	5	No	No hits	No Significant hits					lipid metabolic process [GO:0006629]
C4MB72	EHI_032470	Uncharacterized protein	hypothetical protein	837	Alpha/beta hydrolase family	PlasmaMembrane	golgi apparatus membrane	7	7	No	Anion/Cation	No Significant hits					lipid metabolic process [GO:0006629]
C4M4V9	EHI_028950	Chitobiosyldiphosphodolichol beta-mannosyltransferase, putative	chitobiosyldiphosphodolichol beta-mannosyltransferase, putative	427	Glycosyl transferases group 1	PlasmaMembrane	cytoplasm	2	0	No	No hits	No Significant hits				mannosyltransferase activity [GO:0000030]	protein glycosylation [GO:0006486]
C4M124	EHI_105190	Uncharacterized protein	hypothetical protein	487	Intramolecular chaperone auto-processing domain	PlasmaMembrane	golgi apparatus membrane	5	5	No	No hits	No Significant hits
C4M7H6	EHI_112040	Uncharacterized protein	hypothetical protein	559	Intramolecular chaperone auto-processing domain	PlasmaMembrane	golgi apparatus membrane	5	5	No	No hits	No Significant hits
C4LZ15	EHI_009370	3-ketoacyl-CoA synthase (EC 2.3.1.-)	fatty acid elongase, putative	486	3-Oxoacyl-[acyl-carrier-protein (ACP)] synthase III C terminal	PlasmaMembrane	cytoplasm	2	2	No	Anion/Other	No Significant hits				transferase activity, transferring acyl groups other than amino-acyl groups [GO:0016747]	fatty acid biosynthetic process [GO:0006633]
C4M2E3	EHI_158240	3-ketoacyl-CoA synthase (EC 2.3.1.-)	fatty acid elongase, putative	495	3-Oxoacyl-[acyl-carrier-protein (ACP)] synthase III C terminal	PlasmaMembrane	cytoplasm	2	2	No	Anion/Cation	No Significant hits				transferase activity, transferring acyl groups other than amino-acyl groups [GO:0016747]	fatty acid biosynthetic process [GO:0006633]
C4M9M6	EHI_112870	3-ketoacyl-CoA synthase (EC 2.3.1.-)	fatty acid elongase, putative	478	3-Oxoacyl-[acyl-carrier-protein (ACP)] synthase III C terminal	PlasmaMembrane	cytoplasm	2	4	No	Anion/Cation/Sugar	No Significant hits				transferase activity, transferring acyl groups other than amino-acyl groups [GO:0016747]	fatty acid biosynthetic process [GO:0006633]
C4LWC2	EHI_155730	1-acyl-glycerol-3-phosphate acyltransferase, putative	1-acyl-glycerol-3-phosphate acyltransferase, putative	323	Acyltransferase	PlasmaMembrane	endoplasmic reticulum membrane	2	4	No	No hits	No Significant hits				transferase activity, transferring acyl groups [GO:0016746]	metabolic process [GO:0008152]
C4M932	EHI_097610	Acyl-CoA:1-acylglycerol-3-phosphate acyltransferase, putative	acyl-CoA:1-acylglycerol-3-phosphate acyltransferase, putative	322	Phospholipid/glycerol acyltransferase	PlasmaMembrane	endoplasmic reticulum membrane	2	3	No	No hits	No Significant hits				transferase activity, transferring acyl groups [GO:0016746]	metabolic process [GO:0008152]
C4LUY4	EHI_092190	3-ketoacyl-CoA synthase (EC 2.3.1.-)	fatty acid elongase, putative	487	3-Oxoacyl-[acyl-carrier-protein (ACP)] synthase III, C-terminal	PlasmaMembrane	cytoplasm	2	2	No	Anion/Electron	No Significant hits				transferase activity, transferring acyl groups other than amino-acyl groups [GO:0016747]	fatty acid biosynthetic process [GO:0006633]
B1N502	EHI_156710	3-ketoacyl-CoA synthase 4, putative	3-ketoacyl-CoA synthase 4, putative	231	3-Oxoacyl-[acyl-carrier-protein (ACP)] synthase III, C-terminal	PlasmaMembrane	endoplasmic reticulum membrane	3	3	No	No hits	No Significant hits				transferase activity, transferring acyl groups other than amino-acyl groups [GO:0016747]	fatty acid biosynthetic process [GO:0006633]
C4M5I2	EHI_111000	3-ketoacyl-CoA synthase (EC 2.3.1.-)	fatty acid elongase, putative	494	3-Oxoacyl-[acyl-carrier-protein (ACP)] synthase III, C-terminal	PlasmaMembrane	cytoplasm	2	2	No	Anion/Electron	No Significant hits				transferase activity, transferring acyl groups other than amino-acyl groups [GO:0016747]	fatty acid biosynthetic process [GO:0006633]
C4LYI6	EHI_093950	Glycosyltransferase, putative	alpha-1,2-mannosyltransferase alg11, putative	445	Glycosyl transferases group 1	PlasmaMembrane	endoplasmic reticulum membrane	4	4	No	Anion/Electron	No Significant hits				GDP-Man:Man3GlcNAc2-PP-Dol alpha-1,2-mannosyltransferase activity [GO:0004377]	oligosaccharide-lipid intermediate biosynthetic process [GO:0006490]; protein glycosylation in endoplasmic reticulum [GO:0033577]
C4MBA0	EHI_031520	Phosphatidylinositol N-acetylglucosaminyltransferase subunit C, putative	phosphatidylinositol N-acetylglucosaminyltransferase subunit C, putative	293	Phosphatidylinositol N-acetylglucosaminyltransferase	PlasmaMembrane	endoplasmic reticulum membrane	7	8	No	No hits	No Significant hits				catalytic activity [GO:0003824]; phosphatidylinositol N-acetylglucosaminyltransferase activity [GO:0017176]	GPI anchor biosynthetic process [GO:0006506]
C4M0A5	EHI_005120	Uncharacterized protein	hypothetical protein	371	Phosphatidylinositol-glycan biosynthesis class S protein	PlasmaMembrane	endoplasmic reticulum membrane	2	2	No	No hits	No Significant hits					attachment of GPI anchor to protein [GO:0016255]
C4M0W5	EHI_015270	N-acetylglucosaminyl-phosphatidylinositol de-N-acetylase, putative	N-acetylglucosaminyl-phosphatidylinositol de-N-acetylase, putative	237	N-acetylglucosaminyl phosphatidylinositol deacetylase-related	PlasmaMembrane	endoplasmic reticulum membrane	1	1	No	No hits	No Significant hits
C4LX82	EHI_013150	Phosphoesterase, putative	phosphoesterase, putative	407	Calcineurin-like phosphoesterase	PlasmaMembrane	plasma membrane	4	4	No	Electron	No Significant hits				hydrolase activity [GO:0016787]
C4M1A4	EHI_169810	Uncharacterized protein	hypothetical protein	271	PAP2 superfamily	PlasmaMembrane	endoplasmic reticulum membrane	5	6	No	No hits	No Significant hits
C4LU21	EHI_068280	Uncharacterized protein	hypothetical protein	357	Sphingomyelin synthase-like domain	PlasmaMembrane	golgi apparatus membrane	6	6	No	No hits	No Significant hits				ceramide cholinephosphotransferase activity [GO:0047493]; sphingomyelin synthase activity [GO:0033188]	ceramide biosynthetic process [GO:0046513]
C4LV27	EHI_092670	Hypothetical membrane-spanning protein	hypothetical membrane-spanning protein	301	Sphingomyelin synthase-like domain	PlasmaMembrane	endoplasmic reticulum membrane	6	6	No	No hits	No Significant hits				ceramide cholinephosphotransferase activity [GO:0047493]; sphingomyelin synthase activity [GO:0033188]	ceramide biosynthetic process [GO:0046513]
C4LVF5	EHI_197390	Uncharacterized protein	hypothetical protein	338	Sphingomyelin synthase-like domain	PlasmaMembrane	endoplasmic reticulum membrane	6	6	No	No hits	No Significant hits				ceramide cholinephosphotransferase activity [GO:0047493]; sphingomyelin synthase activity [GO:0033188]	ceramide biosynthetic process [GO:0046513]
C4LVY2	EHI_125970	Uncharacterized protein	hypothetical protein	143	Sphingomyelin synthase-like domain	PlasmaMembrane	endoplasmic reticulum membrane	3	3	No	No hits	No Significant hits				ceramide cholinephosphotransferase activity [GO:0047493]; sphingomyelin synthase activity [GO:0033188]	ceramide biosynthetic process [GO:0046513]
C4M364	EHI_086090	Uncharacterized protein	hypothetical protein	328	Sphingomyelin synthase-like domain	PlasmaMembrane	endoplasmic reticulum membrane	5	6	No	No hits	No Significant hits				ceramide cholinephosphotransferase activity [GO:0047493]; sphingomyelin synthase activity [GO:0033188]	ceramide biosynthetic process [GO:0046513]
C4M5Q9	EHI_129780	Uncharacterized protein	hypothetical protein	333	Sphingomyelin synthase-like domain	PlasmaMembrane	endoplasmic reticulum membrane	5	6	No	No hits	No Significant hits				ceramide cholinephosphotransferase activity [GO:0047493]; sphingomyelin synthase activity [GO:0033188]	ceramide biosynthetic process [GO:0046513]
C4LUG7	EHI_049660	Uncharacterized protein	hypothetical protein, conserved	345	Oligosaccharide biosynthesis protein Alg14-like	PlasmaMembrane	endoplasmic reticulum	2	2	No	Anion/Cation	No Significant hits				transferase activity, transferring hexosyl groups [GO:0016758]	dolichol-linked oligosaccharide biosynthetic process [GO:0006488]
C4M4Y8	EHI_035210	Ser/thr protein phosphatase family protein	ser/thr protein phosphatase family protein	299	Calcineurin-like phosphoesterase	PlasmaMembrane	secreted	1	1	No	No hits	No Significant hits				hydrolase activity [GO:0016787]
C4M5Y4	EHI_137250	Ser/thr protein phosphatase family protein	ser/thr protein phosphatase family protein	628	Transmembrane protein 62	PlasmaMembrane	endoplasmic reticulum membrane	6	6	No	No hits	No Significant hits				hydrolase activity [GO:0016787]
C4M672	EHI_117570	Serine/threonine-protein phosphatase (EC 3.1.3.16)	serine/threonine protein phosphatase, putative	433	Calcineurin-like phosphoesterase	PlasmaMembrane	nucleus	3	4	No	No hits	No Significant hits				phosphoprotein phosphatase activity [GO:0004721]
C4MA36	EHI_180930	Uncharacterized protein	hypothetical protein	376	Calcineurin-like phosphoesterase	PlasmaMembrane	endoplasmic reticulum membrane	3	5	Yes	Electron	No Significant hits				hydrolase activity [GO:0016787]
C4LZS6	EHI_039050	Uncharacterized protein	hypothetical protein, conserved	326	Protein-tyrosine phosphatase-like	PlasmaMembrane	cytoplasm	5	4	No	No hits	No Significant hits				protein tyrosine phosphatase activity [GO:0004725]
C4M5Z2	EHI_181200	Uncharacterized protein	hypothetical protein, conserved	282	Tyrosine phosphatase family C-terminal region	PlasmaMembrane	cytoplasm	1	0	No	No hits	No Significant hits				protein tyrosine phosphatase activity [GO:0004725]
B1N4U5	EHI_157150	Protein kinase, putative	protein kinase, putative	592	Protein kinase domain	PlasmaMembrane	cytoplasm	1	1	No	No hits	No Significant hits				ATP binding [GO:0005524]; protein kinase activity [GO:0004672]
B1N2E2	EHI_153610	Uncharacterized protein	hypothetical protein	231	Protein kinase-like domain superfamily	PlasmaMembrane	secreted	4	2	No	No hits	No Significant hits				cyclin-dependent protein serine/threonine kinase activity [GO:0004693]	cell differentiation [GO:0030154]; DNA repair [GO:0006281]; histone phosphorylation [GO:0016572]; microtubule cytoskeleton organization [GO:0000226]; mitotic cell cycle phase transition [GO:0044772]; regulation of gene expression [GO:0010468]; regulation of meiotic cell cycle [GO:0051445]; regulation of mitotic cell cycle [GO:0007346]
C4M519	EHI_127820	Tyrosine kinase, putative	tyrosine kinase, putative	1590	Protein kinase domain	PlasmaMembrane	cytoplasm	1	1	Yes	No hits	No Significant hits				ATP binding [GO:0005524]; protein serine/threonine kinase activity [GO:0004674]; signal transducer activity [GO:0004871]	intracellular signal transduction [GO:0035556]
C4LUT5	EHI_178710	Phosphoesterase, putative	phosphoesterase, putative	417	Metallo-dependent phosphatase-like	PlasmaMembrane	endoplasmic reticulum membrane	4	4	No	No hits	No Significant hits				hydrolase activity [GO:0016787]
C4M133	EHI_105290	Uncharacterized protein	hypothetical protein	257	Prokaryotic membrane lipoprotein lipid attachment site profile.	PlasmaMembrane	mitochondrion membrane	4	2	No	Cation/Sugar/Other	No significant hits
B1N4B1	EHI_077490	Uncharacterized protein	hypothetical protein	165	MBOAT, membrane-bound O-acyltransferase family	PlasmaMembrane	endoplasmic reticulum membrane	2	4	No	No hits	No significant hits
C4LVZ8	EHI_126130	Uncharacterized protein	hypothetical protein	165	PIG-P	PlasmaMembrane	endoplasmic reticulum membrane	2	2	No	Anion	No significant hits
C4LSH2	EHI_151290	Longevity-assurance family protein	longevity-assurance family protein	327	Sphingosine N-acyltransferase Lag1/Lac1-like	PlasmaMembrane	endoplasmic reticulum membrane	6	8	No	No hits	No significant hits				N-acyltransferase activity [GO:0016410]	lipid metabolic process [GO:0006629]
C4LVU0	EHI_187230	Longevity-assurance family protein	longevity-assurance family protein	325	Sphingosine N-acyltransferase Lag1/Lac1-like	PlasmaMembrane	endoplasmic reticulum membrane	6	8	No	No hits	No significant hits				N-acyltransferase activity [GO:0016410]	lipid metabolic process [GO:0006629]
C4LXF4	EHI_130860	Longevity-assurance family protein	longevity-assurance family protein	325	Sphingosine N-acyltransferase Lag1/Lac1-like	PlasmaMembrane	endoplasmic reticulum membrane	7	8	No	No hits	No significant hits				N-acyltransferase activity [GO:0016410]	lipid metabolic process [GO:0006629]
C4M4K0	EHI_139080	Longevity-assurance family protein	longevity-assurance family protein	330	Sphingosine N-acyltransferase Lag1/Lac1-like	PlasmaMembrane	endoplasmic reticulum membrane	6	8	No	No hits	No significant hits				N-acyltransferase activity [GO:0016410]	lipid metabolic process [GO:0006629]
C4M4U4	EHI_193400	Longevity-assurance family protein	longevity-assurance family protein	330	Sphingosine N-acyltransferase Lag1/Lac1-like	PlasmaMembrane	endoplasmic reticulum membrane	5	8	No	No hits	No significant hits				N-acyltransferase activity [GO:0016410]	lipid metabolic process [GO:0006629]
C4M0E7	EHI_006740	Uncharacterized protein	hypothetical protein	692	Intramolecular chaperone auto-processing domain	PlasmaMembrane	plasma membrane	5	5	No	No hits	No significant hits
C4LT69	EHI_149030	Uncharacterized protein	hypothetical protein	581	Intramolecular chaperone auto-processing domain	PlasmaMembrane	plasma membrane	5	5	No	No hits	No significant hits
C4M7R2	EHI_079180	Uncharacterized protein	hypothetical protein, conserved	354	Endoplasmic reticulum vesicle transporter	PlasmaMembrane	plasma membrane	2	2	No	Anion/Sugar	No significant hits
C4LYT1	EHI_010340	Uncharacterized protein	hypothetical protein	554	Eukaryotic thiol (cysteine) proteases histidine active site.	PlasmaMembrane	secreted	1	1	No	No hits	No significant hits
C4M5J6	EHI_001820	Uncharacterized protein	hypothetical protein	185	domain found in Plexins, Semaphorins and Integrins	PlasmaMembrane	secreted	1	0	Yes	No hits	No significant hits
C4MB70	EHI_198000	Uncharacterized protein	hypothetical protein	214	Piezo non-specific cation channel, R-Ras-binding domain	PlasmaMembrane	chloroplast	2	2	No	Cation/Other	No significant hits
C4M2U4	EHI_188770	Uncharacterized	hypothetical protein	146	Legume-like lectin family	PlasmaMembrane	secreted	1	1	Yes	No hits	No significant hits
C4M2V7	EHI_188900	Uncharacterized protein	hypothetical protein	113	ER protein Pkr1	PlasmaMembrane	secreted	2	2	No	Cation/Proteins/MRNA	No significant hits					vacuolar proton-transporting V-type ATPase complex assembly [GO:0070072]
C4M7F1	EHI_166450	Uncharacterized protein	hypothetical protein	554	Domain of unknown function (DUF4209)	PlasmaMembrane	secreted	1	0	No	No hits	No significant hits
C4LTT9	EHI_050690	Uncharacterized	hypothetical protein	321	DnaJ domain	PlasmaMembrane	cytoplasm	1	0	No	No hits	No significant hits
C4M9H4	EHI_105770	Uncharacterized protein	hypothetical protein	165	Microsomal signal peptidase 25 kDa subunit (SPC25)	PlasmaMembrane	endoplasmic reticulum membrane	2	2	No	No hits	No significant hits				peptidase activity [GO:0008233]	protein targeting to ER [GO:0045047]; signal peptide processing [GO:0006465]
C4LZR9	EHI_038980	Uncharacterized protein	hypothetical protein	226	Prokaryotic membrane lipoprotein lipid attachment site profile.	PlasmaMembrane	endoplasmic reticulum membrane	4	3	No	Anion/Sugar/Other	No significant hits
C4LZW7	EHI_194560	Uncharacterized protein	hypothetical protein	562	Intramolecular chaperone auto-processing domain	PlasmaMembrane	endoplasmic reticulum membrane	4	5	No	No hits	No significant hits				nucleic acid binding [GO:0003676]
C4M2M7	EHI_005920	Uncharacterized protein	hypothetical protein	175	GPI-GlcNAc transferase complex, PIG-H component	PlasmaMembrane	chloroplast	2	2	No	No hits	No significant hits				phosphatidylinositol N-acetylglucosaminyltransferase activity [GO:0017176]
C4M1E7	EHI_030780	Uncharacterized protein	hypothetical protein	430	Alpha/beta hydrolase family	PlasmaMembrane	endoplasmic reticulum membrane	2	2	No	No hits	No significant hits				hydrolase activity, acting on ester bonds [GO:0016788]	cellular lipid metabolic process [GO:0044255]
C4LV58	EHI_182770	Uncharacterized protein	hypothetical protein	627	Eukaryotic thiol (cysteine) proteases cysteine active site.	PlasmaMembrane	secreted	1	1	No	No hits	No significant hits
C4LYT5	EHI_010380	Uncharacterized protein	hypothetical protein	483	DENN (AEX-3) domain	PlasmaMembrane	cytoplasm	2	2	No	No hits	No significant hits
C4M9D1	EHI_149860	Uncharacterized protein	Hypothetical protein T24C12.3, putative	691	pfkB family carbohydrate kinase	PlasmaMembrane	cytoplasm	1	2	No	Electron/Proteins/mRNA	No significant hits				hydrolase activity, acting on glycosyl bonds [GO:0016798]; phosphotransferase activity, alcohol group as acceptor [GO:0016773]
C4M5J8	EHI_001840	Uncharacterized protein	hypothetical protein, conserved	282	Protein of unknown function DUF92, TMEM19	PlasmaMembrane	plasma membrane	6	7	No	Cation	No significant hits
C4M8R6	EHI_181540	Uncharacterized protein	hypothetical protein	167	Ubiquitin family	PlasmaMembrane	chloroplast	2	2	No	No hits	No significant hits
C4M7T2	EHI_114660	Uncharacterized protein	hypothetical protein, conserved	180	DENN (AEX-3) domain	PlasmaMembrane	cytoplasm	3	0	No	No hits	No significant hits
B1N2M6	EHI_178640	Uncharacterized protein	Yos1-like domain-containing protein	84	Yos1-like	PlasmaMembrane	endoplasmic reticulum membrane	2	2	No	Cation	No significant hits					ER to Golgi vesicle-mediated transport [GO:0006888]
C4LXF3	EHI_130850	Uncharacterized protein	hypothetical protein, conserved	425	Cleft lip and palate transmembrane protein 1 (CLPTM1)	PlasmaMembrane	endoplasmic reticulum membrane	5	5	No	No hits	No significant hits
C4LVB3	EHI_196950	Uncharacterized protein	hypothetical protein	104	Rab5-interacting protein (Rab5ip)	PlasmaMembrane	endoplasmic reticulum membrane	3	3	No	Anion/Other	No significant hits
C4MAS3	EHI_049060	Uncharacterized protein	hypothetical protein	123	FAMILY NOT NAMED (PTHR36460)	PlasmaMembrane	golgi apparatus membrane	3	3	No	No hits	No significant hits
C4LZ56	EHI_104450	Uncharacterized protein	hypothetical protein	538	Papain-like cysteine peptidase superfamily	PlasmaMembrane	endoplasmic reticulum membrane	1	1	No	No hits	No significant hits
C4LZ19	EHI_009410	Uncharacterized protein	hypothetical protein, conserved	601	T-cell immunomodulatory protein	PlasmaMembrane	plasma membrane	1	1	Yes	Anion/Sugar	No significant hits
C4M1W9	EHI_164760	Uncharacterized protein	hypothetical protein, conserved	298	short chain dehydrogenase	PlasmaMembrane	endoplasmic reticulum membrane	1	1	No	No hits	No significant hits				oxidoreductase activity [GO:0016491]
C4M3A1	EHI_175220	Uncharacterized protein	hypothetical protein, conserved	227	tRNA methyltransferase complex GCD14 subunit	PlasmaMembrane	nucleus	1	0	No	Anion/Cation/Sugar	No significant hits				tRNA (adenine-N1-)-methyltransferase activity [GO:0016429]
C4M3R1	EHI_146190	Uncharacterized protein	hypothetical protein	298	Uncharacterised conserved protein (DUF2305)	PlasmaMembrane	cytoplasm	1	0	No	No hits	No significant hits					lipid storage [GO:0019915]
C4MA22	EHI_039600	Uncharacterized protein	hypothetical protein	606	Protein of unknown function (DUF1620)	PlasmaMembrane	cytoplasm	1	1	Yes	No hits	No significant hits
C4M9Q1	EHI_055360	Uncharacterized protein	hypothetical protein	222	Tetraspanin family	PlasmaMembrane	endoplasmic reticulum membrane	4	5	No	No hits	No significant hits
C4MBK8	EHI_160220	Uncharacterized protein	hypothetical protein, conserved	472	Putative integral membrane protein conserved region (DUF2404)	PlasmaMembrane	endoplasmic reticulum membrane	1	1	No	No hits	No significant hits				lipid binding [GO:0008289]
C4M287	EHI_180370	Uncharacterized protein	hypothetical protein	232	YhhN-like protein	PlasmaMembrane	endoplasmic reticulum membrane	7	8	No	No hits	No significant hits
C4LYK4	EHI_118430	Uncharacterized protein	hypothetical protein, conserved	330	PAP2 superfamily	PlasmaMembrane	endoplasmic reticulum membrane	7	8	No	No hits	No significant hits
C4M0E4	EHI_006710	Uncharacterized protein	hypothetical protein, conserved	447	Alpha/beta hydrolase family	PlasmaMembrane	endoplasmic reticulum membrane	2	3	No	No hits	No significant hits				hydrolase activity, acting on ester bonds [GO:0016788]	cellular lipid metabolic process [GO:0044255]
C4LVE4	EHI_197270	Uncharacterized protein	hypothetical protein, conserved	293	emp24/gp25L/p24 family/GOLD	PlasmaMembrane	secreted	1	1	Yes	No hits	No significant hits
C4LZC9	EHI_000800	Uncharacterized protein	hypothetical protein	194	Transmembrane adaptor Erv26	PlasmaMembrane	golgi apparatus membrane	4	5	No	No hits	No significant hits				COPII adaptor activity [GO:0097020]	ER to Golgi vesicle-mediated transport [GO:0006888]
C4LWF4	EHI_096410	Uncharacterized protein	hypothetical protein	136	Protein of unknown function DUF4870	PlasmaMembrane	golgi apparatus membrane	3	3	No	No hits	No significant hits
B1N3E0	EHI_027570	Uncharacterized protein	No hits	61	Sec61beta family	Nuclear	mitochondrion membrane	1	0	No	Sugar/Other	No significant hits
C4LZG8	EHI_138080	Uncharacterized protein	hypothetical protein	203	emp24/gp25L/p24 family/GOLD	Cytoplasmic	endoplasmic reticulum membrane	1	1	Yes	Cation	No significant hits
C4LWE6	EHI_096330	Polysaccharide deacetylase, putative	polysaccharide deacetylase, putative	275	Polysaccharide deacetylase	PlasmaMembrane	secreted	1	1	No	Anion	No significant hits				hydrolase activity, acting on carbon-nitrogen (but not peptide) bonds [GO:0016810]	carbohydrate metabolic process [GO:0005975]
C4M5Q4	EHI_129870	Leucine rich repeat protein, BspA family	leucine rich repeat protein, BspA family	344	Apyrase	PlasmaMembrane	chloroplast	1	0	No	No hits	No significant hits
C4LTD7	EHI_045240	Uncharacterized protein	hypothetical protein, conserved	176	Protein of unknown function (DUF778)	PlasmaMembrane	endoplasmic reticulum membrane	2	3	No	No hits	No significant hits
B1N2M8	EHI_179070	Uncharacterized protein	hypothetical protein, conserved	420	Protein of unknown function (DUF3184)	Vacuole	golgi apparatus membrane	1	0	No	No hits	No significant hits
C4MBJ8	EHI_163240	Phosphatidate cytidylyltransferase, putative	phosphatidate cytidylyltransferase, putative	230	FAMILY NOT NAMED (PTHR32523)	PlasmaMembrane	plasma membrane	5	7	No	Anion	No significant hits				kinase activity [GO:0016301]; nucleotidyltransferase activity [GO:0016779]
B1N3T4	EHI_111730	Uncharacterized protein	hypothetical protein	55	Integral membrane protein S linking to the trans Golgi network	PlasmaMembrane	secreted	1	1	No	No hits	No significant hits
C4M703	EHI_057830	Uncharacterized protein	hypothetical protein, conserved	366	Protein of unknown function (DUF1682)	Nuclear	endoplasmic reticulum membrane	1	1	Yes	Proteins/mRNA	No significant hits
C4M9X1	EHI_179310	Short chain dehydrogenase family protein	short chain dehydrogenase family protein	311	short chain dehydrogenase	PlasmaMembrane	endoplasmic reticulum membrane	1	2	No	Anion/Cation	No significant hits				oxidoreductase activity [GO:0016491]
C4LVX3	EHI_125870	Uncharacterized protein	hypothetical protein	536	Nicastrin	PlasmaMembrane	plasma membrane	1	2	Yes	No hits	No significant hits				endopeptidase activity [GO:0004175]	protein processing [GO:0016485]
B1N4A4	EHI_162230	Alpha-1,3-mannosyltransferase ALG2, putative	alpha-1,3-mannosyltransferase ALG2, putative	340	Glycosyl transferases group 1	Cytoplasmic	endoplasmic reticulum membrane	1	0	No	Anion/Electron/Other	No significant hits
C4M5L3	EHI_001990	Alpha-1,3-mannosyltransferase ALG2, putative	alpha-1,3-mannosyltransferase ALG2, putative	397	Glycosyl transferases group 1	Cytoplasmic	endoplasmic reticulum membrane	1	1	No	Anion/Electron/Other	No significant hits	Incompletely characterized transport systems	9.B.159.9.2	Inclusion Membrane Protein (IncA) Family
C4M176	EHI_188010	Vesicle transport protein	hypothetical protein, conserved	177	Got1/Sft2-like family	PlasmaMembrane	golgi apparatus membrane	4	4	No	Anion/Sugar	No significant hits	Secondary carriers	2.A.118.1.7	Basic Amino Acid Antiporter (ArcD) Family		protein transport [GO:0015031]; vesicle-mediated transport [GO:0016192]
C4MAP1	EHI_162550	Vesicular integral membrane protein VIP36, putative	vesicular integral membrane protein VIP36, putative	410	Legume-like lectin family	PlasmaMembrane	golgi apparatus membrane	1	1	Yes	Anion/Proteins/mRNA	No significant hits	Channel	1.A.30.6.7	H+- or Na+-translocating Bacterial Flagellar Motor/ExbBD Outer Membrane Transport Energizer (Mot-Exb) Superfamily
C4M7M4	EHI_200230	Cell surface protease gp63, putative	cell surface protease gp63, putative	643	Leishmanolysin	PlasmaMembrane	cytoplasm	1	1	Yes	Anion/Sugar	No significant hits	Secondary carriers	2.A.19.3.3	Ca2+:Cation Antiporter (CaCA) Family	metalloendopeptidase activity [GO:0004222]	cell adhesion [GO:0007155]
C4LZ48	EHI_104370	Vesicular integral membrane protein VIP36, putative	Legume-like lectin family protein, membrane-bound	380	Leucine rich repeats (6 copies)	PlasmaMembrane	golgi apparatus membrane	1	0	No	No hits	No significant hits	Secondary carriers	2.A.19.3.3	Ca2+:Cation Antiporter (CaCA) Family
C4LVB9	EHI_197020	Signal peptidase I (EC 3.4.21.89)	signal peptidase, putative	189	Peptidase S24-like	PlasmaMembrane	endoplasmic reticulum membrane	2	2	No	Anion	No significant hits	Secondary carriers	2.A.19.3.3	Ca2+:Cation Antiporter (CaCA) Family	peptidase activity [GO:0008233]; serine-type peptidase activity [GO:0008236]	signal peptide processing [GO:0006465]
B1N2E7	EHI_153710	Methylene-fatty-acyl-phospholipid synthase, putative	methylene-fatty-acyl-phospholipid synthase, putative	137	Phospholipid methyltransferase	PlasmaMembrane	endoplasmic reticulum membrane	3	3	No	Anion/Sugar	No significant hits	Secondary carriers	2.A.19.3.3	Ca2+:Cation Antiporter (CaCA) Family	S-adenosylmethionine-dependent methyltransferase activity [GO:0008757]	phosphatidylcholine biosynthetic process [GO:0006656]
C4LSF0	EHI_153680	Carbohydrate degrading enzyme, putative	carbohydrate degrading enzyme, putative	262	Polysaccharide deacetylase	PlasmaMembrane	secreted	1	1	No	No hits	No significant hits	Secondary carriers	2.A.19.3.3	Ca2+:Cation Antiporter (CaCA) Family	hydrolase activity, acting on carbon-nitrogen (but not peptide) bonds [GO:0016810]	carbohydrate metabolic process [GO:0005975]
C4LSC9	EHI_153380	Membrane transporter, putative	membrane transporter, putative	333	Protein of unknown function (DUF2838)	PlasmaMembrane	endoplasmic reticulum membrane	8	8	No	No hits	No significant hits	Secondary carriers	2.A.19.3.3	Ca2+:Cation Antiporter (CaCA) Family
C4LWE1	EHI_096280	Endo-1,4-beta-xylanase, putative	endo-1,4-beta-xylanase, putative	316	Putative esterase	PlasmaMembrane	secreted	1	1	Yes	Anion	No significant hits	Secondary carriers	2.A.19.3.3	Ca2+:Cation Antiporter (CaCA) Family
C4M6J7	EHI_060420	Rab GTPase activating protein, putative	Rab GTPase activating protein, putative	401	Rab-GTPase-TBC domain	PlasmaMembrane	golgi apparatus	1	1	No	No hits	No significant hits	Secondary carriers	2.A.19.3.3	Ca2+:Cation Antiporter (CaCA) Family	GTPase activator activity [GO:0005096]; Rab GTPase binding [GO:0017137]	activation of GTPase activity [GO:0090630]; intracellular protein transport [GO:0006886]; regulation of vesicle fusion [GO:0031338]
C4M0W4	EHI_015260	Rab GTPase activating protein, putative	Rab GTPase activating protein, putative	302	Rab-GTPase-TBC domain	PlasmaMembrane	endoplasmic reticulum membrane	1	4	No	Anion/Cation	No significant hits	Secondary carriers	2.A.19.3.3	Ca2+:Cation Antiporter (CaCA) Family	GTPase activator activity [GO:0005096]; Rab GTPase binding [GO:0017137]	ER to Golgi vesicle-mediated transport [GO:0006888]
C4MBH4	EHI_073170	Topoisomerase, putative	topoisomerase, putative	365	Serine/Threonine protein kinases, catalytic domain	PlasmaMembrane	nucleus	7	7	No	No hits	8	Accessory factors involved in transport	8.A.104.1.3	5'-AMP-activated protein kinase (AMPK) Family
C4M1Y9	EHI_165070	Short chain dehydrogenase family protein	estradiol 17-beta-dehydrogenase, putative	323	short chain dehydrogenase	PlasmaMembrane	endoplasmic reticulum membrane	1	2	No	Anion/Electron/Other	No significant hits	Secondary carriers	2.A.19.3.3	Ca2+:Cation Antiporter (CaCA) Family
C4LZ04	EHI_118210	Short chain dehydrogenase family protein	estradiol 17-beta-dehydrogenase, putative	306	short chain dehydrogenase	PlasmaMembrane	endoplasmic reticulum membrane	1	2	No	Anion/Electron	No significant hits	Secondary carriers	2.A.19.3.3	Ca2+:Cation Antiporter (CaCA) Family	oxidoreductase activity [GO:0016491]
C4M4A1	EHI_098040	Zinc finger domain containing protein	zinc finger domain containing protein	445	The RING-variant domain is a C4HC3 zinc-finger like motif found in a number of cellular and viral proteins. Some of these proteins have been shown both in vivo and in vitro to have ubiquitin E3 ligase activity.	PlasmaMembrane	plasma membrane	2	4	No	No hits	No significant hits	Secondary carriers	2.A.19.3.3	Ca2+:Cation Antiporter (CaCA) Family	zinc ion binding [GO:0008270]
